# Supplementary material
Source: MDPI journal article supplement (https://www.mdpi.com/2077-0472/13/1/63)
Supplement: s1 [file s1 › Table S3.xls]

## Sheet: Table S3
Table S3 OTUs of FUN Guild functional groups of soil fungal communities in different aged apple orchards
OTU ID	T1	T10	T11	T12	T13	T14	T2	T3	T4	T5	T6	T7	T8	T9	Taxonomy p	Taxonomy g	Trophic Mode	Guild
OTU1949	2644	12799.3	2497.33	4593	4792	1315.67	1452	6371.67	3214	10789.7	6973.67	7395.33	2218	6033.67	p__Ascomycota	g__Gibberella	Pathotroph	Plant Pathogen
OTU46	713.667	1946.33	1855	1193.67	4587.67	632.333	34512.3	3039	974.333	156.667	7226.33	3833.33	695.667	1392.33	p__Ascomycota	g__Chaetomium	Pathotroph-Saprotroph-Symbiotroph	Animal Pathogen-Dung Saprotroph-Endophyte-Epiphyte-Plant Saprotroph-Wood Saprotroph
OTU1524	4127.67	5402.33	2530.67	5859.67	5404.67	6635	834.333	1860.67	5149	550.667	5103.67	5209.67	1421	4507.67	p__Zygomycota	g__Mortierella	Saprotroph-Symbiotroph	Endophyte-Litter Saprotroph-Soil Saprotroph-Undefined Saprotroph
OTU927	8985	973.667	1816.33	3778.67	709.667	2686	260.333	3720.67	5525.67	1514.67	3182	1208.67	419.333	5703.33	p__Basidiomycota	g__Cryptococcus	Pathotroph-Saprotroph-Symbiotroph	Fungal Parasite-Undefined Saprotroph
OTU1530	2780	2107.33	981	3583.33	2085	7391.33	408	480	2095.67	79	1908.33	2631.67	1444	1684	p__Zygomycota	g__Mortierella	Saprotroph-Symbiotroph	Endophyte-Litter Saprotroph-Soil Saprotroph-Undefined Saprotroph
OTU818	3716.67	529	166	742	561.667	1895.33	6214.33	2737.67	1614.67	100.667	476.667	1216.67	1055.67	541.333	p__Ascomycota	g__unclassified_f__Chaetomiaceae	Pathotroph-Saprotroph-Symbiotroph	Animal Pathogen-Dung Saprotroph-Endophyte-Epiphyte-Plant Saprotroph-Wood Saprotroph
OTU1390	1681.67	3703.67	1122.33	2621.33	1186.67	838.667	74.6667	969.333	3690.67	71	1249	995.333	1587	1321.67	p__Zygomycota	g__Mortierella	Saprotroph-Symbiotroph	Endophyte-Litter Saprotroph-Soil Saprotroph-Undefined Saprotroph
OTU164	0	0	18554	0	0	0	3.33333	0	0	0	0	0	0	0	p__Basidiomycota	g__Sistotrema	Saprotroph-Symbiotroph	Ectomycorrhizal-Wood Saprotroph
OTU1712	2484.67	4130.33	247.667	742.667	652.333	412.333	23.3333	2171.67	1196.67	27	909	790.667	674	3815.67	p__Zygomycota	g__Mortierella	Saprotroph-Symbiotroph	Endophyte-Litter Saprotroph-Soil Saprotroph-Undefined Saprotroph
OTU1525	0	0	13725	0	0	11.6667	2.66667	0	0	0	0	0.333333	0	0	p__Ascomycota	g__unclassified_f__Sclerotiniaceae	Pathotroph	Plant Pathogen
OTU1526	774.333	831.667	438.667	915.667	781.667	405.667	356.667	599.333	1472	801.667	1901.67	1466.33	672.667	1763	p__Ascomycota	g__Fusarium	Pathotroph-Saprotroph-Symbiotroph	Animal Pathogen-Endophyte-Lichen Parasite-Plant Pathogen-Soil Saprotroph-Wood Saprotroph
OTU1721	183.333	752.667	510.667	426	3718.67	255.667	169.667	321.333	616	82.6667	123	576	3797.33	1200.67	p__Ascomycota	g__Fusarium	Pathotroph-Saprotroph-Symbiotroph	Animal Pathogen-Endophyte-Lichen Parasite-Plant Pathogen-Soil Saprotroph-Wood Saprotroph
OTU896	0	0	0	0	774.333	0	0	10515.7	0	0	0	0	0	0	p__Ascomycota	g__unclassified_o__Sordariales	-	-
OTU1202	0	0	0	0	0	0	0	0	0	11256.7	0	0	0	0	p__Chytridiomycota	g__Rhizophlyctis	Saprotroph	Undefined Saprotroph
OTU1585	1	1041.33	19	0.666667	2.33333	88	0	253.333	169.333	98.3333	4.33333	2.66667	8700.33	0	p__Ascomycota	g__Microdochium	Pathotroph-Symbiotroph	Endophyte-Plant Pathogen
OTU1675	2749.33	90.6667	133.667	229.333	135	176	120.667	341.333	1028.67	506.333	1159.67	615	65.6667	2080.33	p__Ascomycota	g__Humicola	Saprotroph	Undefined Saprotroph-Wood Saprotroph
OTU223	506.333	59	180	1546.33	696	301	0	663.333	197	500.667	217	3344.67	2.33333	604.333	p__Ascomycota	g__Humicola	Saprotroph	Undefined Saprotroph-Wood Saprotroph
OTU11	2.33333	984.667	19.6667	414.667	530	35.6667	69.6667	117.667	65.3333	6132	88.3333	140.667	23.3333	34	p__Ascomycota	g__unclassified_f__Bionectriaceae	Saprotroph	Undefined Saprotroph
OTU1346	524.667	120.667	382.667	462	838.333	469.667	847	235.333	381	411.667	1022	877.667	966	806.667	p__Ascomycota	g__Fusarium	Pathotroph-Saprotroph-Symbiotroph	Animal Pathogen-Endophyte-Lichen Parasite-Plant Pathogen-Soil Saprotroph-Wood Saprotroph
OTU1420	47	793.333	212.667	2918	36.3333	476	217.667	456	558	0	1048	42	652	449.333	p__Basidiomycota	g__Minimedusa	-	-
OTU1648	0	0	0	0.333333	0	945.667	0	4.33333	0	1662	0	0	5211	0	p__Chytridiomycota	g__Rhizophlyctis	Saprotroph	Undefined Saprotroph
OTU662	500	349.333	241.667	140	248.333	953	738.667	613.333	975.667	14	100	108.667	1700.33	1128	p__Ascomycota	g__unclassified_f__Microascaceae	Pathotroph-Saprotroph-Symbiotroph	Animal Pathogen-Endophyte-Plant Pathogen-Undefined Saprotroph
OTU1533	0	0	0	0	0	65	0	0	442	0	147	6993	0	2	p__unclassified_k__Fungi	g__unclassified_k__Fungi	-	-
OTU1839	611.333	22.6667	1222	2383.33	140.667	206.333	7.33333	223	208	375	406.333	1381	65	242	p__Ascomycota	g__unclassified_f__Chaetomiaceae	Pathotroph-Saprotroph-Symbiotroph	Animal Pathogen-Dung Saprotroph-Endophyte-Epiphyte-Plant Saprotroph-Wood Saprotroph
OTU1565	3152.67	479.667	248.667	165.667	36.3333	1085	146.667	352	264.333	72.3333	94.6667	287	966.333	32.3333	p__Ascomycota	g__Pseudallescheria	Saprotroph	Undefined Saprotroph
OTU1962	239.333	573.667	144.667	227.667	732.333	48	19	3053.33	630	122	63.6667	418.667	209	809.667	p__Ascomycota	g__Gibellulopsis	Pathotroph	Plant Pathogen
OTU1512	141	863	451	775.333	1329	640	25.3333	820	371	194.667	229.333	956	116	378	p__Ascomycota	g__Tetracladium	Saprotroph	Undefined Saprotroph
OTU383	828	428.333	0	69	2494	6.33333	4	531.333	1236	0	60.6667	773.667	0	466.333	p__unclassified_k__Fungi	g__unclassified_k__Fungi	-	-
OTU1104	177.667	1433	296	789	108.667	492	95.3333	219.333	1670.33	21.3333	613.667	269.667	60.6667	486.333	p__Ascomycota	g__unclassified_p__Ascomycota	-	-
OTU470	289.333	267.667	897.333	651.333	258.333	1416	250	162.333	288.333	173.667	403.667	295	338.333	597	p__Ascomycota	g__Ilyonectria	Saprotroph	Undefined Saprotroph
OTU1597	1539.67	52.3333	79.6667	53.3333	51	141.667	39.6667	92.6667	240.333	2.33333	1.33333	88.3333	3782.67	4	p__Ascomycota	g__Kernia	Saprotroph	Dung Saprotroph-Undefined Saprotroph
OTU1140	2.33333	0	0	2.66667	9.66667	1.66667	111.667	333.667	60.3333	5521.33	0	20.6667	1.66667	1	p__Ascomycota	g__Lectera	Pathotroph	Plant Pathogen
OTU1742	292	85	13.3333	36	18.6667	144	28.6667	147.333	1872.33	0	0	11.6667	354	2753.67	p__Basidiomycota	g__Guehomyces	-	-
OTU1449	140.333	358.667	341.333	11.3333	71	168	463.667	183	183.333	18.6667	301.667	580	273	2637.67	p__Ascomycota	g__Fusarium	Pathotroph-Saprotroph-Symbiotroph	Animal Pathogen-Endophyte-Lichen Parasite-Plant Pathogen-Soil Saprotroph-Wood Saprotroph
OTU428	0	0	0	1	5689	0	0	0	26.3333	4.66667	0	0	0	0	p__Ascomycota	g__Podospora	Saprotroph-Symbiotroph	Dung Saprotroph-Endophyte-Litter Saprotroph-Undefined Saprotroph
OTU222	90.6667	1935.67	149.333	724	335.333	549.667	269.333	308.333	189	93.3333	355.667	133.667	273	228	p__Ascomycota	g__Gibberella	Pathotroph	Plant Pathogen
OTU1422	0	0	0	95.3333	21	0	0	0	0.666667	30	5475.67	10	0	0	p__Ascomycota	g__Preussia	Saprotroph	Dung Saprotroph-Plant Saprotroph
OTU1047	20.3333	0	6	1308.33	167.667	0.333333	0	9.33333	84.6667	79.6667	1289	0	1638	11.6667	p__Ascomycota	g__unclassified_o__Sordariales	-	-
OTU2004	145	256.667	1485.33	135	1293.67	457.333	0.666667	335.333	36	10	38.6667	7.66667	23.3333	319.667	p__Ascomycota	g__Cylindrocarpon	Pathotroph	Plant Pathogen
OTU1505	134.667	0	7	122.667	93.6667	26.6667	0	9.66667	1153.33	0.666667	176.667	2626.33	30.3333	7.33333	p__Ascomycota	g__Metarhizium	Pathotroph	Animal Pathogen
OTU1375	603	119.667	55.6667	168	194.667	832	0	96.6667	131	202	1067.33	165.333	270	332.333	p__Zygomycota	g__unclassified_f__Mortierellaceae	Saprotroph-Symbiotroph	Endophyte-Litter Saprotroph-Soil Saprotroph-Undefined Saprotroph
OTU845	45	84.6667	5.33333	77.6667	242.667	15.6667	172.333	682	34.6667	340	78.3333	1254.33	1134.67	18	p__Ascomycota	g__Monographella	Pathotroph	Plant Pathogen
OTU783	49.3333	94	357.333	493.333	3	1246.33	423	47.3333	53.3333	21.6667	620.333	254.333	258	236	p__Ascomycota	g__Metarhizium	Pathotroph	Animal Pathogen
OTU52	134	89.6667	7.33333	10.6667	21	3432.33	75	52	21.3333	38.6667	26.6667	67.6667	11	48	p__Ascomycota	g__Chaetomium	Pathotroph-Saprotroph-Symbiotroph	Animal Pathogen-Dung Saprotroph-Endophyte-Epiphyte-Plant Saprotroph-Wood Saprotroph
OTU408	93.6667	0	9.33333	158.333	2913.33	821.667	0	14.3333	0	1.66667	0.666667	0	5.66667	0	p__Zygomycota	g__Mortierella	Saprotroph-Symbiotroph	Endophyte-Litter Saprotroph-Soil Saprotroph-Undefined Saprotroph
OTU524	242.667	215.333	95.6667	135.333	722.333	619.333	1.66667	86.3333	348	2.66667	98.6667	342	491	297.333	p__Ascomycota	g__Nectria	Pathotroph-Saprotroph-Symbiotroph	Animal Pathogen-Endophyte-Fungal Parasite-Lichen Parasite-Plant Pathogen-Wood Saprotroph
OTU651	1097	12.6667	21	159.667	220.333	44	6.33333	9.66667	691	7	115.667	411.333	66.6667	794	p__Ascomycota	g__unclassified_f__Lasiosphaeriaceae	Saprotroph	Undefined Saprotroph
OTU951	33.6667	412	163.667	865.667	202	712.667	41	600.333	164.333	23.6667	142	77	19.6667	63.3333	p__Ascomycota	g__Clonostachys	Pathotroph	Plant Pathogen
OTU730	650.667	4	437.333	924.333	25	492.667	43	111.667	221.667	205.333	48	90.3333	115.667	68.6667	p__Ascomycota	g__unclassified_f__Chaetomiaceae	Pathotroph-Saprotroph-Symbiotroph	Animal Pathogen-Dung Saprotroph-Endophyte-Epiphyte-Plant Saprotroph-Wood Saprotroph
OTU1765	373	320.667	81.3333	93.6667	47.6667	324.333	65.3333	52	209	9	8.33333	94.6667	1203.67	523	p__Ascomycota	g__Kernia	Saprotroph	Dung Saprotroph-Undefined Saprotroph
OTU1722	92	88.3333	558	402.667	192.667	547.667	62	94	73.3333	7	163.333	4	289.333	441.333	p__Zygomycota	g__Mortierella	Saprotroph-Symbiotroph	Endophyte-Litter Saprotroph-Soil Saprotroph-Undefined Saprotroph
OTU460	117	43	38	226.333	285	626.667	65.6667	98.6667	117.667	39	627.667	257.333	44.6667	314.667	p__Ascomycota	g__Acremonium	Pathogen-Saprotroph-Symbiotroph	Animal Pathogen-Endophyte-Fungal Parasite-Plant Pathogen-Wood Saprotroph
OTU1383	21.3333	153.333	108	116	84.3333	324	245.667	36.6667	53.6667	6.66667	323	406.667	163.667	833.667	p__Ascomycota	g__Pseudogymnoascus	Pathotroph-Saprotroph-Symbiotroph	Animal Pathogen-Soil Saprotroph
OTU415	34	2	7	48	211	46.6667	6.33333	24.3333	70	1852	327	107	7	63.3333	p__Ascomycota	g__Myrothecium	Saprotroph	Undefined Saprotroph
OTU528	37.6667	64.3333	2	9.66667	12.6667	806.333	1337.33	13.3333	0.666667	0	0.333333	9.33333	276	3.66667	p__Ascomycota	g__Ilyonectria	Saprotroph	Undefined Saprotroph
OTU1038	0	0	3.33333	30.3333	46.3333	2.66667	31.3333	254	1634.67	3.33333	7	490	29	7.66667	p__Ascomycota	g__unclassified_f__Nectriaceae	Saprotroph	Undefined Saprotroph
OTU889	322	206	282	98	141.667	72	46.3333	213.333	165.667	32	190.333	330.333	47	378.667	p__Ascomycota	g__Schizothecium	Saprotroph	Dung Saprotroph
OTU686	673.667	362.333	45.6667	37	12	312.333	185	367.333	120.667	1	29.3333	7.33333	304.667	39.6667	p__Ascomycota	g__Wardomyces	Saprotroph	Undefined Saprotroph
OTU1058	211.333	62	21.6667	75.6667	28	6.33333	178.333	24.3333	149.333	44.3333	577	64.3333	24.6667	974.667	p__Ascomycota	g__Stachybotrys	Saprotroph	Undefined Saprotroph
OTU310	477	21.6667	0	1857.67	1	0	1.33333	0.333333	0.333333	1.66667	0.666667	12.6667	0	52	p__Ascomycota	g__Peziza	Saprotroph-Symbiotroph	Dung Saprotroph-Ectomycorrhizal-Litter Saprotroph-Undefined Saprotroph
OTU1892	16.3333	122.333	242.333	84.6667	36	921.667	244.667	26.6667	117	67.3333	26.3333	136	7.66667	366.333	p__Ascomycota	g__unclassified_c__Leotiomycetes	-	-
OTU1168	473.667	20.6667	95.3333	485	16.3333	1	0	3.33333	92	969.667	43.6667	1.33333	49	10	p__Ascomycota	g__Volutella	Pathotroph	Plant Pathogen
OTU1562	0	0	0	13	0	0	0	0	1.66667	0	2.66667	0	2227.33	0	p__Ascomycota	g__unclassified_c__Sordariomycetes	-	-
OTU952	73.6667	164	0	0.333333	76	0	0	1658.33	74	0	33.6667	6.66667	79.3333	39.6667	p__Zygomycota	g__Mortierella	Saprotroph-Symbiotroph	Endophyte-Litter Saprotroph-Soil Saprotroph-Undefined Saprotroph
OTU721	1408.67	0	7	3.33333	29.6667	9.33333	12.6667	0.666667	348.333	37.6667	164.667	119.333	0	35.3333	p__Ascomycota	g__Talaromyces	Saprotroph	Undefined Saprotroph
OTU1992	231.333	930	174	12.3333	7	271	90.6667	133.667	110.667	1.66667	3	106.333	28.3333	34	p__Ascomycota	g__Kernia	Saprotroph	Dung Saprotroph-Undefined Saprotroph
OTU1559	0	0	0	0	0	0	0	108.667	51.6667	0	0	0	1884.67	0	p__Ascomycota	g__Pseudaleuria	Saprotroph	Undefined Saprotroph
OTU1006	0	0	2.33333	6	33.3333	0	0	0.333333	1958.67	1.33333	15.6667	12	0	1.33333	p__Ascomycota	g__Leptosphaeria	Pathotroph	Plant Pathogen
OTU605	41.3333	205	71.3333	51.3333	98.3333	878	179	49.3333	98.6667	11.3333	10.3333	158.667	99.6667	62.6667	p__Ascomycota	g__Fusarium	Pathotroph-Saprotroph-Symbiotroph	Animal Pathogen-Endophyte-Lichen Parasite-Plant Pathogen-Soil Saprotroph-Wood Saprotroph
OTU1107	23.6667	13	11	16	13.6667	19.6667	87.3333	206.333	1150.67	0	0	16.6667	103.333	317	p__Basidiomycota	g__Guehomyces	-	-
OTU1886	26.3333	154.333	23.3333	31.6667	4.33333	33.3333	978.667	120.667	488.333	8.66667	52.3333	9.66667	3	11.6667	p__Ascomycota	g__Cephaliophora	-	-
OTU1706	134.667	72	194.667	151	212.667	582.667	33.3333	57.6667	53.3333	37	37	50.3333	164.667	145.333	p__Ascomycota	g__unclassified_c__Sordariomycetes	-	-
OTU1465	1352	9.66667	70	32.3333	55	25.3333	0	164.667	7.66667	1	99.6667	75.6667	8	16	p__Ascomycota	g__unclassified_o__Hypocreales	Saprotroph	Undefined Saprotroph
OTU1233	0	0	0	0.333333	0	0	0	0.333333	0	1894.33	0	0.333333	0	0	p__Ascomycota	g__unclassified_c__Sordariomycetes	-	-
OTU1431	165.667	28.3333	24.3333	58.3333	19	5.66667	0	11.6667	2.66667	150	1165.33	41.3333	16	178	p__Ascomycota	g__Preussia	Saprotroph	Dung Saprotroph-Plant Saprotroph
OTU1938	97	80.6667	50	80	31	629.333	192.333	328	67.6667	0	3	51	186.333	24.3333	p__Ascomycota	g__unclassified_f__Microascaceae	Pathotroph-Saprotroph-Symbiotroph	Animal Pathogen-Endophyte-Plant Pathogen-Undefined Saprotroph
OTU945	0	5.66667	0	1.33333	0	0.333333	0	1616	0	0	0.333333	32.6667	0	0	p__Ascomycota	g__unclassified_f__Lasiosphaeriaceae	Saprotroph	Undefined Saprotroph
OTU1444	38	412.333	18.3333	350.333	158	17	0	5	3.33333	0	14.6667	489	1.33333	144.333	p__Ascomycota	g__unclassified_c__Sordariomycetes	-	-
OTU1015	4.33333	340.333	56.3333	252.333	182.667	1.33333	10.3333	3.66667	763	0.666667	0.333333	2.33333	12.6667	12	p__Ascomycota	g__Tetracladium	Saprotroph	Undefined Saprotroph
OTU1077	0	22	29.3333	6	0.666667	6	1.33333	3.33333	1412.33	0	1	48	0	1.33333	p__Ascomycota	g__Sagenomella	Saprotroph	Undefined Saprotroph
OTU735	74.3333	8.33333	11	70	3.66667	9.33333	35	56.3333	1100.67	2	31	11.6667	9.66667	97	p__Ascomycota	g__Gymnoascus	Saprotroph	Undefined Saprotroph
OTU396	6	25.3333	4.66667	618.333	107.667	12.3333	2	42	191.333	27.3333	87.3333	38.6667	297.667	15.3333	p__Ascomycota	g__unclassified_c__Sordariomycetes	-	-
OTU443	0	0	3	6	1124.67	0	0	252.333	80.6667	0.333333	2.66667	0.666667	3	0	p__Ascomycota	g__Gibellulopsis	Pathotroph	Plant Pathogen
OTU374	34	89.3333	2.66667	1107.33	114.333	5	4.33333	8.66667	14.6667	6.33333	20.3333	36.3333	1	15.3333	p__Ascomycota	g__Humicola	Saprotroph	Undefined Saprotroph-Wood Saprotroph
OTU1931	3.66667	52.3333	4.66667	61	42	1	44.6667	385.333	325	51.6667	6	379.333	46.6667	45.3333	p__Ascomycota	g__unclassified_f__Nectriaceae	Saprotroph	Undefined Saprotroph
OTU1641	83.3333	87.6667	97.6667	3.33333	6.66667	67.6667	58	503.667	168.333	0	0	3	317.333	11.3333	p__Ascomycota	g__unclassified_f__Microascaceae	Pathotroph-Saprotroph-Symbiotroph	Animal Pathogen-Endophyte-Plant Pathogen-Undefined Saprotroph
OTU716	1380.33	0	0	0	0	0.333333	0	0	0	0	0.333333	0	0	0	p__Ascomycota	g__Oidiodendron	Pathotroph-Symbiotroph	Ericoid Mycorrhizal
OTU1460	70.6667	69	44	12	10	36.3333	16.3333	9.33333	58.3333	9	595.667	113	8.66667	244.667	p__Ascomycota	g__Aspergillus	Saprotroph	Undefined Saprotroph
OTU264	107.667	0	0	1109.67	2	4.33333	0	0	0	0	0.333333	39.6667	0	0	p__Ascomycota	g__Apodus	Saprotroph	Undefined Saprotroph
OTU1103	0	0	0	3	3.66667	7.66667	0	229.667	313.333	69.3333	13	598	0	0	p__Ascomycota	g__Lectera	Pathotroph	Plant Pathogen
OTU1911	4.33333	0	8.33333	0	91	1102	7	0	1.33333	5	0.666667	1	3	0	p__Ascomycota	g__Apodus	Saprotroph	Undefined Saprotroph
OTU1339	2.33333	0	0	0.666667	833	0.666667	0	0.333333	0	0.333333	5.66667	0	0	375.333	p__Zygomycota	g__Mortierella	Saprotroph-Symbiotroph	Endophyte-Litter Saprotroph-Soil Saprotroph-Undefined Saprotroph
OTU530	0	0	0	2.66667	0	1194	0	0	0.333333	1.66667	0.333333	0	0	0	p__Ascomycota	g__Beauveria	Pathotroph	Animal Pathogen
OTU705	213.333	6	6.33333	230.333	176.667	2.33333	0	15.6667	23.3333	52.6667	298	74.6667	76.3333	1.66667	p__Ascomycota	g__unclassified_o__Pleosporales	-	-
OTU636	71.3333	51	16.3333	116.667	12.3333	9.66667	20.3333	17.3333	11.6667	597	154.667	15.6667	58.6667	13.6667	p__Ascomycota	g__unclassified_f__norank_o__Pleosporales	-	-
OTU145	15	32	242.333	3.66667	118.333	474.333	160	3.33333	7	1	0.666667	37.6667	17.3333	27	p__Ascomycota	g__unclassified_p__Ascomycota	-	-
OTU965	5.33333	249.667	8	12.3333	87.3333	99.6667	25.3333	24.3333	76	321.333	21.3333	9	46.3333	136.333	p__Ascomycota	g__unclassified_f__Davidiellaceae	-	-
OTU351	74.3333	60.3333	45	66.3333	24	116	44.3333	38.3333	16.6667	6.33333	36.3333	134.667	10	444.667	p__Ascomycota	g__Periconia	Pathotroph-Saprotroph-Symbiotroph	Endophyte-Plant Pathogen-Wood Saprotroph
OTU1277	2.66667	41	0.333333	4.33333	234.667	56.3333	97.3333	42	36.3333	494.667	3.66667	1.66667	84.6667	3.33333	p__Ascomycota	g__Alternaria	Pathotroph-Saprotroph-Symbiotroph	Animal Pathogen-Endophyte-Plant Pathogen-Wood Saprotroph
OTU1499	2	947	7.66667	0	13.6667	11.3333	19.3333	23.6667	4.66667	0	1.66667	55	7	8.33333	p__Ascomycota	g__Kernia	Saprotroph	Dung Saprotroph-Undefined Saprotroph
OTU1201	36.6667	177.667	44.3333	70.3333	81	15.6667	21.3333	95.6667	43	152	105	107.333	27.3333	116.333	p__Ascomycota	g__unclassified_f__Nectriaceae	Saprotroph	Undefined Saprotroph
OTU1340	0	6.33333	0	0	88	0	0	0	0	384.667	609	0	0	0	p__Ascomycota	g__Curvularia	Pathotroph	Plant Pathogen
OTU1173	15.6667	0	0	27	22.3333	0	0	0	69	51.6667	410.333	34.6667	0	451.667	p__Ascomycota	g__unclassified_f__Lasiosphaeriaceae	Saprotroph	Undefined Saprotroph
OTU1571	0.666667	718	6	0	21.6667	0	0	125.667	22.6667	0	0	0	185.667	0	p__Ascomycota	g__unclassified_f__Pyronemataceae	Saprotroph-Symbiotroph	Dung Saprotroph-Ectomycorrhizal-Soil Saprotroph-Wood Saprotroph
OTU12	35	245.333	11.3333	39	11	280.333	0	184.333	108.333	0	0.666667	8	99.6667	43	p__Ascomycota	g__unclassified_o__Microascales	-	-
OTU1259	88	107.333	40	79	52.3333	8.33333	12.3333	90.6667	127	139.333	108	114	19.3333	79.6667	p__Ascomycota	g__Fusarium	Pathotroph-Saprotroph-Symbiotroph	Animal Pathogen-Endophyte-Lichen Parasite-Plant Pathogen-Soil Saprotroph-Wood Saprotroph
OTU1595	0	0.333333	0	0	0	0	0	0	0	0	0	0	1051	0	p__Ascomycota	g__unclassified_o__Xylariales	-	-
OTU1829	55	2.66667	43	362.667	41.6667	16	5	188.667	61.3333	154.667	30.3333	64	1	19	p__Ascomycota	g__unclassified_f__Chaetomiaceae	Pathotroph-Saprotroph-Symbiotroph	Animal Pathogen-Dung Saprotroph-Endophyte-Epiphyte-Plant Saprotroph-Wood Saprotroph
OTU427	5	6.66667	3.33333	24.3333	731	2.66667	0	69.3333	33	9.66667	6	135.667	0	11.6667	p__Ascomycota	g__Gibellulopsis	Pathotroph	Plant Pathogen
OTU1731	2.33333	54	68	14.6667	43.3333	137.333	128.667	6.33333	15	0.666667	8.66667	29	28.3333	486.667	p__Ascomycota	g__Pseudogymnoascus	Pathotroph-Saprotroph-Symbiotroph	Animal Pathogen-Soil Saprotroph
OTU991	46.3333	263.333	46.6667	153.333	14	53.3333	40	193.333	41.6667	108	9.33333	6.33333	9	36.3333	p__Ascomycota	g__unclassified_f__Thelebolaceae	-	-
OTU1284	23	59	12.6667	40	2.66667	3.33333	31.3333	19	26	640.333	2.66667	69	1.66667	89	p__Ascomycota	g__unclassified_c__Leotiomycetes	-	-
OTU400	4	0	0	26	937.667	0	0	1.33333	0	0	0	0	0	0	p__Ascomycota	g__Fusarium	Pathotroph-Saprotroph-Symbiotroph	Animal Pathogen-Endophyte-Lichen Parasite-Plant Pathogen-Soil Saprotroph-Wood Saprotroph
OTU551	61	87.3333	0	83	65.3333	34.6667	95.6667	13.6667	89.3333	0	33	43	98.6667	262.333	p__Zygomycota	g__Mortierella	Saprotroph-Symbiotroph	Endophyte-Litter Saprotroph-Soil Saprotroph-Undefined Saprotroph
OTU591	9	64.6667	112.667	205.333	46.6667	326	2	24.6667	40	1	6.66667	27	62.6667	16	p__Ascomycota	g__Volutella	Pathotroph	Plant Pathogen
OTU607	9.66667	1	3.33333	0	0	919.333	0	6	0	0	0.666667	0	1.33333	0	p__Ascomycota	g__Preussia	Saprotroph	Dung Saprotroph-Plant Saprotroph
OTU452	0	3.66667	61.3333	332.667	264.333	70.3333	0	12.3333	5.66667	0.333333	55.6667	10.3333	0	60	p__Ascomycota	g__unclassified_f__Lasiosphaeriaceae	Saprotroph	Undefined Saprotroph
OTU1348	70	77.3333	19.3333	87.6667	27.3333	8	8.66667	31.3333	40.3333	2	298.333	73	7.33333	112.333	p__Ascomycota	g__unclassified_p__Ascomycota	-	-
OTU1419	57.6667	71	30	61	39.3333	13	15.6667	66.3333	115.333	87	84.3333	95.3333	30.3333	79.6667	p__Ascomycota	g__Fusarium	Pathotroph-Saprotroph-Symbiotroph	Animal Pathogen-Endophyte-Lichen Parasite-Plant Pathogen-Soil Saprotroph-Wood Saprotroph
OTU1862	0	0	0	0	0	1	0	842.333	0	0	0	0	0	0	p__Basidiomycota	g__unclassified_o__Auriculariales	-	-
OTU1507	0	9.66667	2.33333	13.6667	0	0	0	7.66667	775	0	5.33333	5.33333	1	4	p__Ascomycota	g__unclassified_p__Ascomycota	-	-
OTU109	172.667	22.3333	38	101	17.6667	12.6667	153.333	15.3333	49.3333	35.6667	113.333	25.3333	4.66667	43.6667	p__Ascomycota	g__Stachybotrys	Saprotroph	Undefined Saprotroph
OTU90	3	341	2	102	23	0.333333	0	104.333	127.333	0	2.33333	24	40	20	p__Zygomycota	g__Mortierella	Saprotroph-Symbiotroph	Endophyte-Litter Saprotroph-Soil Saprotroph-Undefined Saprotroph
OTU778	0	1.33333	0	0	0	36.6667	750.333	0	0	0	0	0	0	0	p__unclassified_k__Fungi	g__unclassified_k__Fungi	-	-
OTU1925	0.333333	0.333333	4.66667	9.33333	11	0	0	19.3333	90	497.667	0.333333	5.33333	131	0	p__Ascomycota	g__Phoma	Pathotroph-Saprotroph-Symbiotroph	Endophyte-Dung Saprotroph-Lichen Parasite-Litter Saprotroph-Plant Pathogen-Soil Saprotroph-Wood Saprotroph
OTU494	34	267	0	0	27.6667	403.667	0	4.33333	4	5.33333	14.3333	0	0	0	p__Ascomycota	g__unclassified_f__Bionectriaceae	Saprotroph	Undefined Saprotroph
OTU1718	110.333	41.6667	46	34	25.3333	44.6667	21.3333	16.3333	35.6667	0	58.6667	46	4.33333	248.667	p__Ascomycota	g__unclassified_p__Ascomycota	-	-
OTU1416	34.6667	0.333333	9.66667	5.33333	4	35.3333	142.333	15.6667	0	107.667	241	13	19.3333	89.3333	p__Ascomycota	g__unclassified_p__Ascomycota	-	-
OTU811	145.333	189.333	6.66667	11.6667	6.66667	10.6667	122	30.3333	93	0.333333	3.33333	13	84	0	p__Ascomycota	g__Oidiodendron	Pathotroph-Symbiotroph	Ericoid Mycorrhizal
OTU678	11	21	13.6667	22	0	0.333333	0	6	4	0	0.333333	5	625.667	0	p__Zygomycota	g__Mortierella	Saprotroph-Symbiotroph	Endophyte-Litter Saprotroph-Soil Saprotroph-Undefined Saprotroph
OTU1733	6.33333	0.333333	0	6.33333	8.66667	1.66667	12.3333	2	0	0	0	4.33333	0	646	p__Ascomycota	g__Tetracladium	Saprotroph	Undefined Saprotroph
OTU1406	200.333	5	2	50.6667	10.6667	3.33333	7.66667	7	10.6667	31	297.667	6	1.66667	21.6667	p__Ascomycota	g__Pyrenochaetopsis	Pathotroph-Saprotroph-Symbiotroph	Endophyte-Lichen Parasite-Undefined Saprotroph
OTU498	9.33333	30	18.6667	9.66667	2.33333	215	4.33333	5.66667	10	0.333333	5	5	316.667	7	p__Ascomycota	g__unclassified_o__norank	-	-
OTU933	0	5	53	36.3333	0	3.66667	4.66667	76	0.333333	449.333	0.333333	6	1	0	p__Ascomycota	g__Stagonosporopsis	Pathotroph	Plant Pathogen
OTU322	5.33333	14.6667	6.66667	3	0	13.6667	5.66667	51	19	0	0.333333	0	507.333	2.66667	p__Ascomycota	g__Gymnoascus	Saprotroph	Undefined Saprotroph
OTU720	49.3333	1.33333	10	15.3333	28.3333	32.6667	0.666667	20.6667	54	59	104.333	12.6667	179	55.6667	p__unclassified_k__Fungi	g__unclassified_k__Fungi	-	-
OTU300	6	36.3333	1	312.667	3.66667	1.33333	10.3333	13	28.6667	0	2	83.3333	68.6667	46.3333	p__Ascomycota	g__Leptosphaeria	Pathotroph	Plant Pathogen
OTU169	210	0.333333	9.66667	26.6667	0	4.66667	0	10	1	0	11.6667	317.667	11.6667	5.33333	p__Ascomycota	g__unclassified_f__Lasiosphaeriaceae	Saprotroph	Undefined Saprotroph
OTU1439	15.6667	0	0	0.666667	2.66667	5	39	10.3333	33.6667	2	10	309.333	116	60.3333	p__Ascomycota	g__unclassified_c__Sordariomycetes	-	-
OTU1384	64	1	3.66667	147.667	232.333	0	0	9.33333	0.333333	22	95.6667	22	0	0	p__Ascomycota	g__unclassified_f__Nectriaceae	Saprotroph	Undefined Saprotroph
OTU534	0	25.3333	0	8.66667	4.66667	384	0.333333	10	1	148.333	1.66667	1.33333	0.666667	0.333333	p__Ascomycota	g__unclassified_f__Bionectriaceae	Saprotroph	Undefined Saprotroph
OTU1078	0	57.3333	10	0.333333	30.6667	0	0	0	481.333	0.333333	0	0	0	0	p__Ascomycota	g__Phaeomycocentrospora	-	-
OTU475	1.66667	0	0	0	0	570.333	0	0	0	0	0.333333	0.333333	0	0	p__Ascomycota	g__Auxarthron	Saprotroph	Dung Saprotroph-Soil Saprotroph
OTU104	17	145.333	20	47.6667	42.6667	12	5.33333	47	23.6667	36.3333	49.3333	59	9.66667	47.3333	p__Ascomycota	g__Gibberella	Pathotroph	Plant Pathogen
OTU465	4.66667	12	6.66667	223	192	10	0	2.66667	65.6667	0	0	9.33333	23	11.6667	p__Ascomycota	g__unclassified_c__Sordariomycetes	-	-
OTU973	5.33333	10.6667	22.3333	13.3333	374	64	3.66667	8.66667	6	0	2.33333	35	12.3333	0.333333	p__Ascomycota	g__Tetracladium	Saprotroph	Undefined Saprotroph
OTU1469	15.6667	0	3.66667	48.3333	26.3333	65	0	109	14.6667	0	25.3333	76.3333	49.6667	121.333	p__Zygomycota	g__Mortierella	Saprotroph-Symbiotroph	Endophyte-Litter Saprotroph-Soil Saprotroph-Undefined Saprotroph
OTU1908	0	0	0	0	0	0	0	536	0	0	0	9.66667	0	0	p__Ascomycota	g__unclassified_p__Ascomycota	-	-
OTU562	0.333333	159.667	33.3333	101	9	18	9.66667	49	53	2.33333	1	37.6667	14.6667	51.6667	p__Ascomycota	g__unclassified_f__Halosphaeriaceae	Saprotroph	Undefined Saprotroph-Wood Saprotroph
OTU1085	78.3333	58.3333	11.3333	24.3333	37.3333	9	7.33333	24.6667	71.3333	2	185.667	3.33333	11	0	p__Ascomycota	g__unclassified_o__Hypocreales	Saprotroph	Undefined Saprotroph
OTU931	35	0	5	4.66667	69	11.3333	38.6667	66.3333	0	60	94.3333	71.3333	0	53.6667	p__Zygomycota	g__Mortierella	Saprotroph-Symbiotroph	Endophyte-Litter Saprotroph-Soil Saprotroph-Undefined Saprotroph
OTU1682	11.3333	0	1.33333	5.33333	4.66667	12.3333	2	2.66667	1	4.33333	416	0.333333	9	36.3333	p__Ascomycota	g__unclassified_o__Onygenales	-	-
OTU277	0	5.66667	0	452	43	0	0	0	0	0	0	0	0	0	p__Ascomycota	g__Myrothecium	Saprotroph	Undefined Saprotroph
OTU840	17.3333	2	0	0	0.666667	67.3333	353.667	0.333333	0	0.666667	1	7.66667	49.3333	0	p__Ascomycota	g__unclassified_c__Sordariomycetes	-	-
OTU1633	142.667	0	5.33333	64	1.33333	0	0	0	0	1.33333	0	0	281	0	p__Chytridiomycota	g__Olpidiaster	Pathotroph	Animal Parasite-Fungal Parasite
OTU382	0	0	1	3.66667	477	2.66667	0	2	4	0.333333	0	0	0.333333	0	p__Ascomycota	g__unclassified_f__Lasiosphaeriaceae	Saprotroph	Undefined Saprotroph
OTU481	213.333	1.66667	5	17.3333	1.66667	12.3333	0	9.66667	90.6667	26.6667	2.66667	43.6667	35.6667	27.3333	p__Ascomycota	g__Chaetomium	Pathotroph-Saprotroph-Symbiotroph	Animal Pathogen-Dung Saprotroph-Endophyte-Epiphyte-Plant Saprotroph-Wood Saprotroph
OTU2028	65.3333	0	0	5.66667	281.333	0	0	18	51.3333	1	23	7.33333	0	31	p__Ascomycota	g__Preussia	Saprotroph	Dung Saprotroph-Plant Saprotroph
OTU1361	26.6667	108.333	3.33333	63.6667	28.3333	0	152.333	6.33333	38	1	46.3333	6.66667	1.66667	1	p__Ascomycota	g__Myrmecridium	Saprotroph	Undefined Saprotroph
OTU966	33.3333	37.6667	21.3333	53.6667	25.3333	17	17.3333	22	36.3333	21.3333	88.3333	26.6667	18	57	p__Ascomycota	g__unclassified_f__norank_o__Pleosporales	-	-
OTU201	0	0	0	472.667	0	0	0	0	0	0	0	0	0	0	p__Basidiomycota	g__Coprinellus	Saprotroph	Dung Saprotroph-Plant Saprotroph-Wood Saprotroph
OTU73	2.66667	322	5	0	6.33333	0.666667	0	13.6667	0	1	14.6667	92	0	0	p__Ascomycota	g__Schizothecium	Saprotroph	Dung Saprotroph
OTU490	8	13.3333	36	0	7.33333	234.667	0	28.6667	6.66667	0	1.66667	104.333	0.666667	10.6667	p__Ascomycota	g__unclassified_f__Nectriaceae	Saprotroph	Undefined Saprotroph
OTU848	19.3333	47.3333	27	2	8.33333	13.6667	24	26	25	3.33333	25.3333	49	17.6667	160.333	p__Ascomycota	g__Fusarium	Pathotroph-Saprotroph-Symbiotroph	Animal Pathogen-Endophyte-Lichen Parasite-Plant Pathogen-Soil Saprotroph-Wood Saprotroph
OTU20	0	439.667	1.33333	1	0	0	0	0	0	0	0	0	0	1.33333	p__unclassified_k__Fungi	g__unclassified_k__Fungi	-	-
OTU1137	0	0	0	0	4.33333	0	0	0	0	428	0	0	11	0	p__Ascomycota	g__Myrothecium	Saprotroph	Undefined Saprotroph
OTU1125	0	0.666667	0	72.6667	9.66667	0	0	0	0	335.333	13	0	5.66667	0	p__Ascomycota	g__Bipolaris	Pathotroph	Plant Pathogen
OTU1241	0	0	0	0.333333	5	0	0	6	18	386.667	1	7	4.33333	8	p__Ascomycota	g__Phoma	Pathotroph-Saprotroph-Symbiotroph	Endophyte-Dung Saprotroph-Lichen Parasite-Litter Saprotroph-Plant Pathogen-Soil Saprotroph-Wood Saprotroph
OTU441	14.3333	2.33333	3	2.33333	45	30.3333	263.333	9	9	4.33333	3.66667	0	45.3333	0	p__Ascomycota	g__Acremonium	Pathogen-Saprotroph-Symbiotroph	Animal Pathogen-Endophyte-Fungal Parasite-Plant Pathogen-Wood Saprotroph
OTU1275	0	0	4.33333	3.33333	357	0	11.6667	1.66667	1.66667	26.6667	0	1.66667	0.666667	0	p__Ascomycota	g__Roussoella	Saprotroph	Undefined Saprotroph
OTU1321	1.33333	0	0	0	0	0	0	0	0	0	407.333	0	0	0	p__Basidiomycota	g__Coprinellus	Saprotroph	Dung Saprotroph-Plant Saprotroph-Wood Saprotroph
OTU1362	46.3333	0	0.333333	7.66667	3.66667	0	0	5	12	11.3333	218.667	18	0	83	p__Ascomycota	g__unclassified_f__Lasiosphaeriaceae	Saprotroph	Undefined Saprotroph
OTU649	62.3333	18.6667	44.3333	69.6667	4.33333	46	1	50.6667	16.6667	3.66667	33.3333	19.6667	1	13.6667	p__Ascomycota	g__Exophiala	Pathotroph-Saprotroph	Animal Pathogen-Undefined Saprotroph
OTU1881	52.6667	62.3333	2.66667	25	1	118.333	16	26	24	1.33333	1	6.66667	27	18.3333	p__Ascomycota	g__unclassified_p__Ascomycota	-	-
OTU1743	28.6667	26	9	43.6667	10.3333	27	11.6667	21.6667	23.6667	67	62	21.3333	3.66667	25	p__Ascomycota	g__unclassified_p__Ascomycota	-	-
OTU1726	5.66667	4.33333	0	2	0	4.66667	16.3333	1.33333	1	5.33333	117.333	33	0	185.333	p__Ascomycota	g__unclassified_c__Sordariomycetes	-	-
OTU425	0	0.333333	0	2	282.333	0	0	4.66667	58.3333	0	0.333333	26.3333	0	0	p__Ascomycota	g__Schizothecium	Saprotroph	Dung Saprotroph
OTU1239	0	2.66667	0	8.66667	3	1.33333	0.333333	16.3333	0	297	1	23.6667	4	0	p__Ascomycota	g__unclassified_f__norank_o__Pleosporales	-	-
OTU132	0	29	66.6667	14.6667	37	1.33333	156	0.666667	16.6667	0	0.333333	11	10	9.33333	p__Ascomycota	g__Stephanonectria	Saprotroph	Undefined Saprotroph
OTU1016	11.6667	37.6667	7	4	63.3333	29	13.3333	11.6667	66	2.66667	0	29	6.33333	61	p__Ascomycota	g__unclassified_c__Dothideomycetes	-	-
OTU1343	0	0	0	0	0	0	0	0	0	0	332	0	0	0	p__Basidiomycota	g__Minimedusa	-	-
OTU1503	47	70	7.66667	13.6667	3.66667	21	0	4	15	5.66667	82.3333	20	2.33333	37	p__unclassified_k__Fungi	g__unclassified_k__Fungi	-	-
OTU1586	1.66667	0	4	10.3333	23.3333	1	0	24.3333	186	9	6.66667	8	26	28.3333	p__Ascomycota	g__unclassified_f__norank_o__Hypocreales	Saprotroph	Undefined Saprotroph
OTU1774	0.333333	0.333333	0	0	0.333333	12	0	0.666667	2	22	0	0	0	289.667	p__Zygomycota	g__Mortierella	Saprotroph-Symbiotroph	Endophyte-Litter Saprotroph-Soil Saprotroph-Undefined Saprotroph
OTU143	0.666667	0	8	0	0	3	0	313	0	0	0	1.66667	0	0	p__Ascomycota	g__Lophiostoma	Saprotroph	Undefined Saprotroph
OTU160	75	0	5.66667	2.33333	0	4.33333	0	10.6667	22	2.66667	0	2.66667	196	0	p__Ascomycota	g__unclassified_f__Bionectriaceae	Saprotroph	Undefined Saprotroph
OTU1876	6	28	10	31.3333	1.33333	7.66667	13.6667	71.6667	4.66667	0	0	1.33333	142.667	1.33333	p__Ascomycota	g__Gymnoascus	Saprotroph	Undefined Saprotroph
OTU1984	3.33333	1.66667	1	33.3333	0	190	16	18	11	0	19.3333	0	25	1	p__Ascomycota	g__Scedosporium	Saprotroph	Undefined Saprotroph
OTU1359	14	5	2	15.6667	2.66667	11.3333	0	3	0	3.33333	217.667	0.333333	38	5.33333	p__Ascomycota	g__Scedosporium	Saprotroph	Undefined Saprotroph
OTU1108	119	47.6667	13	3	18.6667	11.6667	16	12	34.6667	3	5.66667	29.3333	1.33333	3.33333	p__Ascomycota	g__Trichoderma	Saprotroph	Undefined Saprotroph
OTU719	66	11	1	0	6	0	0	0	186	0	0	37	0	4	p__Ascomycota	g__Chaetomidium	Saprotroph	Dung Saprotroph-Undefined Saprotroph
OTU487	19	0	2.33333	66.3333	0	213.667	0	2	0	0	0	0	4.66667	0	p__Zygomycota	g__Mortierella	Saprotroph-Symbiotroph	Endophyte-Litter Saprotroph-Soil Saprotroph-Undefined Saprotroph
OTU1018	0	9	22	16.3333	30.6667	0	0	96	78	0	7.66667	12.6667	4.66667	24.6667	p__Ascomycota	g__unclassified_o__Pleosporales	-	-
OTU1995	38.3333	13	34.3333	56	12	67.3333	0	10.3333	3.66667	16.6667	31.6667	5.33333	7	0.666667	p__Ascomycota	g__unclassified_o__Xylariales	-	-
OTU1314	0	0.666667	2.33333	17.6667	67.6667	4.33333	0	4	0.666667	181.667	1.66667	12	0	0	p__Ascomycota	g__Hydropisphaera	Saprotroph	Undefined Saprotroph
OTU532	37	0.333333	0	5.66667	3.33333	6	0	2	17.3333	58	148.333	2.33333	7.33333	0	p__Ascomycota	g__Microdochium	Pathotroph-Symbiotroph	Endophyte-Plant Pathogen
OTU289	0	10	27.3333	245	0	2	0	0.666667	0	0	0	0	0	0	p__Ascomycota	g__Myrmecridium	Saprotroph	Undefined Saprotroph
OTU1519	0	9	38.6667	8.33333	2.33333	0.666667	6.33333	6.66667	14.6667	109.333	5.33333	75.6667	2	2	p__Ascomycota	g__Paraphoma	-	-
OTU1598	10	0	8.66667	0	6	0.333333	0	0	7.33333	6.33333	1.33333	6	150.667	82	p__Basidiomycota	g__Ceratobasidium	Pathotroph-Saprotroph-Symbiotroph	Endomycorrhizal-Plant Pathogen-Undefined Saprotroph
OTU1520	18.6667	2.33333	0	13.6667	42.6667	55.6667	0	13.3333	0	0	111.333	18	0	0	p__Ascomycota	g__unclassified_f__Sporormiaceae	Saprotroph	Dung Saprotroph-Plant Saprotroph
OTU583	0	2	0.333333	1.66667	0	233	1.33333	1.66667	0.333333	0	0.333333	0.666667	14.3333	0.333333	p__Zygomycota	g__Mortierella	Saprotroph-Symbiotroph	Endophyte-Litter Saprotroph-Soil Saprotroph-Undefined Saprotroph
OTU1783	15.3333	16.6667	0	5.33333	0	14.6667	87.3333	7.33333	31	0	0	24.6667	1.66667	48.6667	p__Ascomycota	g__Fusarium	Pathotroph-Saprotroph-Symbiotroph	Animal Pathogen-Endophyte-Lichen Parasite-Plant Pathogen-Soil Saprotroph-Wood Saprotroph
OTU1428	43.3333	26	11	32	18.6667	10.6667	1.66667	3.33333	4.66667	0	46.6667	3	4.33333	40.3333	p__Ascomycota	g__unclassified_p__Ascomycota	-	-
OTU2007	28.6667	12	4.33333	7.66667	13.6667	0.666667	25.3333	17.6667	19	12.3333	51.6667	23	16	12.3333	p__Ascomycota	g__unclassified_c__Sordariomycetes	-	-
OTU467	29.6667	2	1.66667	29.6667	0.333333	146.667	3	4.66667	0.666667	0.333333	2.33333	2.33333	15.3333	1.66667	p__Ascomycota	g__Podospora	Saprotroph-Symbiotroph	Dung Saprotroph-Endophyte-Litter Saprotroph-Undefined Saprotroph
OTU884	11	3.66667	2.33333	5	2.33333	20.6667	0.333333	32.6667	5.33333	0	17.6667	5	130.333	3.66667	p__Ascomycota	g__Penicillium	Saprotroph	Undefined Saprotroph
OTU258	23	0.333333	27	48.6667	27	6.33333	0.333333	10.3333	13.6667	5	27.6667	11	9	30.3333	p__Ascomycota	g__Tetracladium	Saprotroph	Undefined Saprotroph
OTU1615	0	1.66667	1.66667	0	0.333333	6.66667	9	0	1	0.333333	2	1.33333	195.333	13.3333	p__unclassified_k__Fungi	g__unclassified_k__Fungi	-	-
OTU158	0	0	210.667	7.33333	1.66667	0	0	0	1	8	0.333333	0.666667	2.66667	0	p__Ascomycota	g__Phaeosphaeria	Saprotroph	Undefined Saprotroph
OTU761	17.6667	1.66667	1.33333	97.3333	0.333333	24.6667	10	42	5.66667	0	0	0.666667	30.6667	0	p__Ascomycota	g__Penicillium	Saprotroph	Undefined Saprotroph
OTU384	0.666667	224.333	0	0.333333	1.33333	0	0	0	1.33333	1.33333	1.33333	0	0	0	p__Ascomycota	g__unclassified_o__Hypocreales	Saprotroph	Undefined Saprotroph
OTU387	13.3333	4	2.33333	15.6667	2.33333	10.6667	0	3	112.667	3.33333	4.33333	2	4.33333	50.3333	p__Basidiomycota	g__Coprinopsis	Saprotroph	Dung Saprotroph-Plant Saprotroph-Wood Saprotroph
OTU542	27.6667	50.3333	11.3333	2	1.66667	22.6667	20	58.6667	6.33333	0	1	15	6.66667	5	p__Ascomycota	g__unclassified_f__Cephalothecaceae	Saprotroph	Fungal Parasite-Wood Saprotroph
OTU297	1	7.33333	6	83.6667	3.66667	29.6667	13.6667	1.33333	0.666667	0	66.6667	4.33333	2.33333	3.66667	p__Ascomycota	g__unclassified_f__Ajellomycetaceae	Pathotroph-Saprotroph	Animal Pathogen-Undefined Saprotroph
OTU22	3.66667	79.6667	1.33333	11.3333	3	3.33333	9	1.66667	3	0	76.3333	7.33333	6.33333	17.3333	p__Ascomycota	g__Beauveria	Pathotroph	Animal Pathogen
OTU372	0	0	0	222.667	0	0	0	0	0	0	0	0	0	0	p__Ascomycota	g__unclassified_o__Hypocreales	Saprotroph	Undefined Saprotroph
OTU1513	124.333	2.33333	0	7.33333	0.333333	2.33333	6.66667	0	4.33333	0.333333	71	2.33333	0	0.333333	p__Ascomycota	g__Acremonium	Pathogen-Saprotroph-Symbiotroph	Animal Pathogen-Endophyte-Fungal Parasite-Plant Pathogen-Wood Saprotroph
OTU1000	57	0.666667	4	27.6667	14.6667	4.33333	0	25.6667	14.3333	19	3.33333	23.6667	0	23	p__Ascomycota	g__Humicola	Saprotroph	Undefined Saprotroph-Wood Saprotroph
OTU121	21.3333	89.6667	2.66667	63	2.33333	6.33333	0	9.33333	2.66667	3	15.6667	0.666667	0	0	p__Ascomycota	g__Microdochium	Pathotroph-Symbiotroph	Endophyte-Plant Pathogen
OTU424	0	2.66667	0	0	213.667	0	0	0	0	0	0	0	0	0	p__Basidiomycota	g__Typhula	Pathotroph	Plant Pathogen
OTU710	210.333	0	0	0	0	0	0	0	0	2	3	0	0	0	p__Ascomycota	g__unclassified_c__Sordariomycetes	-	-
OTU1048	8.66667	0	0	5.33333	0	1.66667	7	16.6667	12.6667	18.3333	20	15.6667	1.33333	101.333	p__Ascomycota	g__Preussia	Saprotroph	Dung Saprotroph-Plant Saprotroph
OTU1329	40	3	0.333333	6	0	0	0	5.33333	43.6667	0.333333	47.3333	1.33333	0	58	p__Basidiomycota	g__Cystofilobasidium	Saprotroph	Leaf Saprotroph
OTU1758	19	0	0	0	33.3333	0	0	0.666667	31	0	93	3.66667	1.66667	22	p__Ascomycota	g__Preussia	Saprotroph	Dung Saprotroph-Plant Saprotroph
OTU1709	0.666667	3	3.33333	13.6667	8.33333	4.66667	15.6667	1.33333	1.66667	46.6667	65	13.6667	1.66667	22.6667	p__Ascomycota	g__Myrothecium	Saprotroph	Undefined Saprotroph
OTU1194	24.6667	0	2	5	0	0	0	0	14.3333	149.333	3.66667	0	0	0	p__Ascomycota	g__Cephaliophora	-	-
OTU402	2	29	41	21.6667	23.3333	1.66667	0	0	0	0	1.33333	69.3333	0	7	p__Ascomycota	g__unclassified_c__Sordariomycetes	-	-
OTU409	4.33333	0.666667	9.33333	22.3333	11.6667	30.3333	0	3.33333	4	27.3333	31.3333	6	5.66667	39	p__Ascomycota	g__Metacordyceps	Pathotroph	Animal Pathogen
OTU199	0	0	0	194.333	0	0	0	0	0	0	0	0	0	0	p__unclassified_k__Fungi	g__unclassified_k__Fungi	-	-
OTU1158	0.666667	0	2.66667	16	20.3333	0	0	2.66667	4	78.6667	68.3333	0.666667	0	0	p__Basidiomycota	g__unclassified_f__Ceratobasidiaceae	Pathotroph-Saprotroph-Symbiotroph	Endomycorrhizal-Plant Pathogen-Undefined Saprotroph
OTU548	2.66667	14.6667	15.3333	58.3333	0.333333	67.3333	0.333333	25	5.33333	0	1.33333	1	0	2	p__Ascomycota	g__Pseudeurotium	Saprotroph	Undefined Saprotroph
OTU1638	0	0	0	0	0	0	0	0	0.333333	30	0	7.33333	155	0	p__Ascomycota	g__unclassified_f__Leptosphaeriaceae	Pathotroph-Saprotroph	Plant Pathogen-Wood Saprotroph
OTU1780	1	4	0.333333	5.33333	0	0	5.33333	96.3333	60.3333	2.66667	4.66667	2.33333	0	9.33333	p__Ascomycota	g__Pseudeurotium	Saprotroph	Undefined Saprotroph
OTU1694	0.666667	1.66667	1.66667	34.6667	1.66667	6	1.33333	0.666667	7.33333	0	1	0	1.33333	129.667	p__Zygomycota	g__Mortierella	Saprotroph-Symbiotroph	Endophyte-Litter Saprotroph-Soil Saprotroph-Undefined Saprotroph
OTU404	0	0	0	0	186.667	0	0	0	0	0	0	0	0	0	p__Ascomycota	g__Schizothecium	Saprotroph	Dung Saprotroph
OTU236	0	18	4.33333	29	0	18.6667	4	3	3	0	7	0	99.3333	0	p__unclassified_k__Fungi	g__unclassified_k__Fungi	-	-
OTU1750	2.66667	24.3333	10.3333	10	2	40	0	10	17.3333	0.666667	1.33333	5	37	25	p__Ascomycota	g__Preussia	Saprotroph	Dung Saprotroph-Plant Saprotroph
OTU914	0	0	0	0	151.667	0	13	11.3333	4	3.33333	0	0	0	0	p__Ascomycota	g__unclassified_c__Sordariomycetes	-	-
OTU1500	8	2	0	0	0	2.33333	0	0	0	0	3	167.333	0	0	p__Ascomycota	g__Verticillium	Pathotroph-Symbiotroph	Endophyte-Fungal Parasite-Plant Pathogen
OTU1280	27	0	1.66667	13	0	13.6667	0	0.333333	2.33333	22	100	0	0	0	p__Ascomycota	g__Stachybotrys	Saprotroph	Undefined Saprotroph
OTU77	0.333333	164	0	9	0	0	0	0	0	0	0	6	0	0	p__Zygomycota	g__Mortierella	Saprotroph-Symbiotroph	Endophyte-Litter Saprotroph-Soil Saprotroph-Undefined Saprotroph
OTU1489	4	0	0	0	0	1	0	0	0	0	150.333	22	1.66667	0.333333	p__Basidiomycota	g__unclassified_o__Agaricales	-	-
OTU137	0	5.33333	128.333	0.333333	12.6667	0	0	1	0	0	22.6667	0	6	0	p__Ascomycota	g__Monosporascus	Pathotroph	Plant Pathogen
OTU1693	11.6667	0	9.33333	0.333333	0.333333	0.333333	0	2.33333	30	4.33333	9.66667	7	0	100.333	p__Ascomycota	g__Monographella	Pathotroph	Plant Pathogen
OTU762	22.3333	28.3333	1	4.66667	0.333333	13	10.3333	5.66667	29.3333	3	0.333333	4.66667	6.33333	45.3333	p__Ascomycota	g__unclassified_p__Ascomycota	-	-
OTU1300	0	0	0	0	0	0	0	0	0	173.333	0	0	0	0	p__Ascomycota	g__Preussia	Saprotroph	Dung Saprotroph-Plant Saprotroph
OTU207	0.666667	1	3	63.6667	45.6667	0	3.33333	1.66667	3.66667	0	39.6667	3.66667	4.33333	2.33333	p__Ascomycota	g__Metarhizium	Pathotroph	Animal Pathogen
OTU282	0.333333	0	0	8.33333	0	0	0	0	3.66667	0	0	0	150.333	8.66667	p__Ascomycota	g__Monosporascus	Pathotroph	Plant Pathogen
OTU656	164.333	0	0	0	0	0	0	0	5.33333	0	0.333333	1	0	0.333333	p__Ascomycota	g__unclassified_p__Ascomycota	-	-
OTU1438	0	0	0	0.333333	12.6667	0.333333	0	0.333333	0	0	2.33333	152.333	0	2	p__Ascomycota	g__Exophiala	Pathotroph-Saprotroph	Animal Pathogen-Undefined Saprotroph
OTU1056	1.66667	18.6667	9.66667	37.3333	1.66667	9.33333	0	8	37	0	1.33333	23	0.333333	22	p__Basidiomycota	g__Mrakia	-	-
OTU16	4.66667	90.3333	5.66667	2	7	3	0	0.666667	1	5	1	8	0	36.6667	p__unclassified_k__Fungi	g__unclassified_k__Fungi	-	-
OTU1454	0	0	0	0	0	1.33333	0	0	0	0	3.33333	160.333	0	0	p__Ascomycota	g__Papulaspora	Pathotroph-Saprotroph	Fungal Parasite-Wood Saprotroph
OTU797	3.33333	0	0	0	134.667	0	19	0	0.666667	0	0.666667	0	4.66667	0	p__Ascomycota	g__unclassified_o__Hypocreales	Saprotroph	Undefined Saprotroph
OTU1907	0	0	0	0	0	0.666667	0	0	0	0	1.33333	155	0	5.66667	p__Ascomycota	g__unclassified_f__Ascobolaceae	Saprotroph	Dung Saprotroph-Soil Saprotroph-Wood Saprotrop
OTU40	0.333333	43	4.66667	0.333333	8	23.3333	5.66667	14.3333	11.3333	0	0	9.33333	32.3333	8.33333	p__Ascomycota	g__unclassified_p__Ascomycota	-	-
OTU1401	12	12	18.6667	11	13	2	15.6667	0	6.66667	0	27.6667	8	1.33333	31.6667	p__Ascomycota	g__unclassified_p__Ascomycota	-	-
OTU1030	0	0	0	0	0	0	0	0	117.333	37	0	0	0	0.333333	p__Ascomycota	g__Curvularia	Pathotroph	Plant Pathogen
OTU869	0	0	0	0	0	0	0	154.333	0	0	0	0	0	0	p__Ascomycota	g__unclassified_p__Ascomycota	-	-
OTU2022	0.666667	2	0.666667	1.33333	0	0	0	46.6667	0	1	1.66667	1.66667	97.6667	0	p__Ascomycota	g__Pseudallescheria	Saprotroph	Undefined Saprotroph
OTU1701	2.66667	9.33333	6.66667	74.3333	5	7.33333	0	3	5	1.33333	18	1.66667	3.66667	12.6667	p__Ascomycota	g__Corynespora	Saprotroph	Undefined Saprotroph
OTU1088	3.33333	24	0.333333	0.333333	1.66667	2.33333	0	9.66667	103.333	0	0	0.333333	1.33333	4	p__Ascomycota	g__Arthrographis	Saprotroph	Undefined Saprotroph
OTU1331	2	0	1.33333	4	1.66667	2	0	0	0	18.6667	34.6667	0.666667	0	82.3333	p__Ascomycota	g__unclassified_p__Ascomycota	-	-
OTU290	0	17.6667	1.66667	11.6667	0	12.6667	77.6667	2.33333	0.333333	4.33333	1.33333	15.6667	0	0	p__Ascomycota	g__Torula	Pathotroph-Saprotroph	Endophyte-Plant Pathogen-Wood Saprotroph
OTU1506	0	0	6	20	0	0.333333	0	2.33333	106.667	1.33333	0	6.66667	0	0	p__Ascomycota	g__Penicillium	Saprotroph	Undefined Saprotroph
OTU1386	25.6667	0.333333	0.333333	1.66667	2.66667	2.66667	4.66667	0.333333	1.66667	2.66667	95.6667	0	0	2.66667	p__Ascomycota	g__Trichoderma	Saprotroph	Undefined Saprotroph
OTU1939	2	4	4.66667	26.6667	0.666667	0.333333	25	15.3333	32.6667	0	0.333333	8.33333	1.33333	19	p__Ascomycota	g__Fusarium	Pathotroph-Saprotroph-Symbiotroph	Animal Pathogen-Endophyte-Lichen Parasite-Plant Pathogen-Soil Saprotroph-Wood Saprotroph
OTU1155	0	0	0.666667	0.666667	0	0	0	0	0	139	0	0	0	0	p__Ascomycota	g__unclassified_p__Ascomycota	-	-
OTU1826	0.666667	34.3333	4.66667	18.3333	38	31.3333	10.3333	0	0	0	1	0	0	0	p__Zygomycota	g__Mortierella	Saprotroph-Symbiotroph	Endophyte-Litter Saprotroph-Soil Saprotroph-Undefined Saprotroph
OTU830	4.66667	12.6667	4.33333	1.33333	1	7	79.6667	1	1.66667	4.66667	3.33333	5	7.33333	4	p__Ascomycota	g__Aspergillus	Saprotroph	Undefined Saprotroph
OTU1868	11.3333	3.33333	1.66667	6.33333	0.666667	86.6667	0	0	0	8	0.666667	0	19	0	p__Ascomycota	g__unclassified_f__Orbiliaceae	Saprotroph	Wood Saprotroph
OTU1458	0	0	8.33333	6.66667	19.6667	14.3333	10.6667	1.66667	32.6667	0	1	39	1.66667	0.666667	p__Ascomycota	g__Leptosphaeria	Pathotroph	Plant Pathogen
OTU976	0	0	0	0	0	0	0	24.6667	8.66667	102.333	0	0	0	0	p__unclassified_k__Fungi	g__unclassified_k__Fungi	-	-
OTU670	49.6667	1.33333	1.66667	5	0.666667	4.33333	40.3333	13.3333	8.66667	0.333333	1.66667	4.66667	1.66667	1.66667	p__Ascomycota	g__Chaetomium	Pathotroph-Saprotroph-Symbiotroph	Animal Pathogen-Dung Saprotroph-Endophyte-Epiphyte-Plant Saprotroph-Wood Saprotroph
OTU1372	0	3	102	1	0	0	0	0	0	0	23.3333	5.66667	0	0	p__Ascomycota	g__Colletotrichum	Pathotroph-Symbiotroph	Endophyte-Plant Pathogen
OTU41	0	40.6667	10	22.6667	1	1.66667	5.33333	22.3333	3.33333	0.333333	0.666667	18.3333	0	6.66667	p__Ascomycota	g__unclassified_p__Ascomycota	-	-
OTU875	29	0	0	0.666667	0	0	0	103.333	0	0	0	0	0	0	p__unclassified_k__Fungi	g__unclassified_k__Fungi	-	-
OTU182	16.6667	1.33333	5.66667	35	2	1	4.33333	1.66667	28	0	16	8.66667	0.666667	10.3333	p__Ascomycota	g__Leptodiscella	Saprotroph	Undefined Saprotroph
OTU729	129.333	0	0	0	0	0	0	0	0	0	0	0	0	0	p__Ascomycota	g__unclassified_f__Coniochaetaceae	Pathotroph-Saprotroph-Symbiotroph	Animal Pathogen-Dung Saprotroph-Endophyte-Lichen Parasite-Plant Pathogen-Undefined Saprotroph
OTU418	0	0	0	0	114.667	1.33333	10.3333	0	0	2.33333	0	0	0	0	p__Zygomycota	g__Mortierella	Saprotroph-Symbiotroph	Endophyte-Litter Saprotroph-Soil Saprotroph-Undefined Saprotroph
OTU255	35.3333	0	1	77	0	0	0	0	0.333333	5	0.666667	0	8.66667	0	p__unclassified_k__Fungi	g__unclassified_k__Fungi	-	-
OTU1474	0	0	3.66667	13	0	1	0	13.3333	0.333333	8.33333	0.666667	84.3333	3.33333	0	p__Ascomycota	g__unclassified_p__Ascomycota	-	-
OTU1517	3.66667	19	7.33333	7.66667	28.6667	2.33333	1.33333	5.66667	6.33333	6	3.33333	8.66667	13.6667	12.3333	p__Ascomycota	g__Fusarium	Pathotroph-Saprotroph-Symbiotroph	Animal Pathogen-Endophyte-Lichen Parasite-Plant Pathogen-Soil Saprotroph-Wood Saprotroph
OTU1981	17.3333	11.6667	8.33333	9	1.33333	2.66667	0	18.3333	10.3333	12	6	8.33333	4.33333	15.6667	p__unclassified_k__Fungi	g__unclassified_k__Fungi	-	-
OTU801	37	1.66667	4.33333	1	1.33333	4.33333	11	8	3.66667	0	2.33333	1	8.66667	40.3333	p__Ascomycota	g__Chrysosporium	Saprotroph	Dung Saprotroph-Soil Saprotroph
OTU59	8.33333	23.3333	0.666667	34	0	0	0	12	42.3333	0	2	0	2	0	p__Ascomycota	g__Chaetomium	Pathotroph-Saprotroph-Symbiotroph	Animal Pathogen-Dung Saprotroph-Endophyte-Epiphyte-Plant Saprotroph-Wood Saprotroph
OTU1080	0	0.333333	0	0	2.33333	0.666667	0	0	4	1.33333	1	21	0	92.6667	p__unclassified_k__Fungi	g__unclassified_k__Fungi	-	-
OTU750	101	0	0.333333	0	0	0	8.33333	4	1.33333	8.33333	0	0	0	0	p__Ascomycota	g__Staphylotrichum	Saprotroph	Undefined Saprotroph
OTU1514	57.6667	0	0	1.33333	0	0.666667	0	0.333333	0	0	1.66667	49.3333	0	12	p__Ascomycota	g__unclassified_o__Hypocreales	Saprotroph	Undefined Saprotroph
OTU1200	1.33333	78.3333	0	3.33333	1.33333	0	0	0	0	38.3333	0	0	0	0	p__Ascomycota	g__Cercophora	Saprotroph	Dung Saprotroph
OTU1072	0	0	0	0	5.33333	0	0	0	5	107.667	3.66667	0	0.666667	0	p__Ascomycota	g__Edenia	Pathotroph	Plant Pathogen
OTU430	2.33333	0	0	0	111.667	0	0	0	0	0	0	0	0	8	p__Ascomycota	g__unclassified_f__Lasiosphaeriaceae	Saprotroph	Undefined Saprotroph
OTU1210	0	0	0	0	0	0	0	0.666667	0	120.667	0	0	0	0	p__Ascomycota	g__Lectera	Pathotroph	Plant Pathogen
OTU697	15	12.3333	6.33333	7	6	2.66667	1.33333	5.33333	12.6667	1.33333	4.66667	11.6667	1.33333	32.6667	p__Ascomycota	g__Schizothecium	Saprotroph	Dung Saprotroph
OTU514	2	35.6667	0.333333	2	0	71	0	6.33333	0	0	0	0.333333	0	2.33333	p__Ascomycota	g__Ulocladium	Pathotroph	Plant Pathogen
OTU1834	5.33333	5	3	2.33333	0.666667	15.3333	57.3333	2	0.666667	4	5.33333	3.66667	10	3.66667	p__Basidiomycota	g__Rhodotorula	Pathotroph-Saprotroph	Animal Endosymbiont-Animal Pathogen-Endophyte-Plant Pathogen-Undefined Saprotroph
OTU261	0.666667	20.3333	0.666667	56.6667	0	0.333333	0	3.33333	0.666667	0	1	7.33333	7	19.3333	p__unclassified_k__Fungi	g__unclassified_k__Fungi	-	-
OTU901	0	0	0	0	0	0	0	116	0	0	0	0	0	0	p__Chytridiomycota	g__Rhizophlyctis	Saprotroph	Undefined Saprotroph
OTU1671	0	0.666667	0	0	0	95.6667	0	0	0	10.6667	0	0	0	7	p__Ascomycota	g__Penicillium	Saprotroph	Undefined Saprotroph
OTU1248	2.66667	0	0	0	1.33333	0	0	4.33333	1	103.333	0.333333	0	0	0	p__Chytridiomycota	g__Rhizophlyctis	Saprotroph	Undefined Saprotroph
OTU99	0.666667	23.3333	1.33333	30.3333	4.33333	4.33333	1.66667	5	19.6667	0	0.333333	2.33333	0.333333	16.6667	p__Ascomycota	g__unclassified_p__Ascomycota	-	-
OTU266	3	6.66667	0	72.6667	5	0	0	0	4.66667	0	0	16	1.33333	0	p__unclassified_k__Fungi	g__unclassified_k__Fungi	-	-
OTU189	1.66667	0.333333	7	8	2.66667	26	0	2.33333	7	12	20	5	1.66667	15.3333	p__Ascomycota	g__unclassified_p__Ascomycota	-	-
OTU796	0	0.333333	18.3333	0	0	10.6667	72.3333	0	0	0	0	0	7.33333	0	p__Ascomycota	g__Sarcopodium	-	-
OTU1437	0	1	0	0	0.333333	0	0	0	12	0	0	1.66667	0	93	p__Ascomycota	g__Colletotrichum	Pathotroph-Symbiotroph	Endophyte-Plant Pathogen
OTU1299	0.666667	0	0	0	0	0	0	0	0	33.6667	69.6667	3.33333	0	0	p__Ascomycota	g__Myrothecium	Saprotroph	Undefined Saprotroph
OTU56	0	82.3333	0	0	24.6667	0	0	0	0	0	0	0	0	0	p__unclassified_k__Fungi	g__unclassified_k__Fungi	-	-
OTU170	3.66667	0	87	0	5	4	1	0.333333	1.33333	0.333333	0.333333	2	0.333333	1.33333	p__unclassified_k__Fungi	g__unclassified_k__Fungi	-	-
OTU1773	12.3333	6.66667	5	4	12	1.33333	16.3333	4	28.6667	0.333333	0	9	3	3	p__Ascomycota	g__Acremonium	Pathogen-Saprotroph-Symbiotroph	Animal Pathogen-Endophyte-Fungal Parasite-Plant Pathogen-Wood Saprotroph
OTU276	0	0.333333	0	66	0	0	8.66667	0.666667	2	3	4.33333	1.33333	0	19	p__Ascomycota	g__unclassified_o__Sordariales	-	-
OTU1094	5.66667	7.33333	4	10.3333	13.3333	2.66667	0.666667	2.33333	14.6667	3.66667	9.66667	10	10.3333	10.6667	p__Ascomycota	g__Fusarium	Pathotroph-Saprotroph-Symbiotroph	Animal Pathogen-Endophyte-Lichen Parasite-Plant Pathogen-Soil Saprotroph-Wood Saprotroph
OTU661	80	0	0	0	0.333333	0	0	0	17.3333	0	1	0.333333	0	4.66667	p__Ascomycota	g__unclassified_f__Microascaceae	Pathotroph-Saprotroph-Symbiotroph	Animal Pathogen-Endophyte-Plant Pathogen-Undefined Saprotroph
OTU1874	20.3333	0.333333	1.66667	3	0.666667	29.6667	5.33333	1.66667	7	5.66667	6	3.66667	2.66667	15	p__Basidiomycota	g__unclassified_c__Wallemiomycetes	-	-
OTU630	0	0	0.666667	0.666667	1	94.3333	0	0	3.33333	0	0	0	1	0	p__Basidiomycota	g__unclassified_c__Agaricomycetes	-	-
OTU812	4.66667	19.3333	7.33333	2.33333	0	0	42.6667	2	15.6667	0	0.666667	0.333333	0	4.33333	p__Ascomycota	g__unclassified_p__Ascomycota	-	-
OTU510	5	2.66667	7	8	7.33333	17.6667	1.66667	2	1.33333	20	14	3.33333	3	6	p__Basidiomycota	g__Entoloma	Pathotroph-Saprotroph-Symbiotroph	Ectomycorrhizal-Fungal Parasite-Soil Saprotroph-Undefined Saprotroph
OTU175	0	0.666667	31	54	0	0	0	0	12.6667	0	0.333333	0	0	0	p__Basidiomycota	g__Cystofilobasidium	Saprotroph	Leaf Saprotroph
OTU1577	0	0.333333	0	1.33333	1	0	0	0.666667	63.3333	0.333333	0	0.666667	29.6667	0	p__Ascomycota	g__Aspergillus	Saprotroph	Undefined Saprotroph
OTU1728	0	0	0	0	0	0	0	0	0	0	0	0	0	95.6667	p__Ascomycota	g__unclassified_f__Lasiosphaeriaceae	Saprotroph	Undefined Saprotroph
OTU165	0	0	95	0	0	0	0	0	0	0	0	0	0	0	p__Basidiomycota	g__Clitopilus	Saprotroph	Undefined Saprotroph
OTU1136	0	0	0	0	1	0	0	0	0	91	0	0	0.666667	0.666667	p__Ascomycota	g__Periconia	Pathotroph-Saprotroph-Symbiotroph	Endophyte-Plant Pathogen-Wood Saprotroph
OTU1548	0	0	0	4.33333	1.66667	0	0	0	3	0	0	0	84.3333	0	p__Zygomycota	g__unclassified_f__Mortierellaceae	Saprotroph-Symbiotroph	Endophyte-Litter Saprotroph-Soil Saprotroph-Undefined Saprotroph
OTU572	25.6667	0	0	35.3333	0.333333	29.3333	0	0	0	0	0.666667	0.333333	0	0	p__Ascomycota	g__unclassified_f__Sporormiaceae	Saprotroph	Dung Saprotroph-Plant Saprotroph
OTU525	0	0	0.333333	0.333333	0	68	8.33333	0.333333	0	0	0.666667	1	10	0	p__Ascomycota	g__unclassified_f__Herpotrichiellaceae	Pathotroph-Saprotroph	Animal Pathogen-Fungal Parasite-Undefined Saprotroph
OTU833	1.66667	6.66667	0	0.333333	0.333333	2.33333	28.3333	1	4.33333	0.666667	0.333333	2.66667	28.3333	11.6667	p__unclassified_k__Fungi	g__unclassified_k__Fungi	-	-
OTU1703	0	0	0	1.33333	1.66667	0	0	0	0	1	15.3333	1.33333	3	64.3333	p__unclassified_k__Fungi	g__unclassified_k__Fungi	-	-
OTU1278	0	0	0	3.66667	4	0	0	0	0.333333	73.3333	3.33333	0	0	3	p__Ascomycota	g__Myrothecium	Saprotroph	Undefined Saprotroph
OTU380	21	0	0	14.3333	0.666667	0	0	0	2.66667	0	30.3333	16.3333	0	2	p__Ascomycota	g__Pyrenochaetopsis	Pathotroph-Saprotroph-Symbiotroph	Endophyte-Lichen Parasite-Undefined Saprotroph
OTU31	0	53.6667	17.6667	5.66667	0	0.333333	0	0	1	0	0	2	1	4.66667	p__Ascomycota	g__unclassified_c__Sordariomycetes	-	-
OTU1207	0	0.666667	1	0	1.33333	18.3333	8	0	0	56.3333	0	0	0	0	p__unclassified_k__Fungi	g__unclassified_k__Fungi	-	-
OTU1498	1	0	0	0.333333	0	0	0	0	4.66667	0	2	76.3333	0	0	p__Basidiomycota	g__Volvariella	Saprotroph	Undefined Saprotroph
OTU1761	0.333333	6.33333	0	11	0.333333	2.66667	0	0.333333	0	1.33333	1	3.33333	30	27.3333	p__unclassified_k__Fungi	g__unclassified_k__Fungi	-	-
OTU1730	4.66667	8.66667	0.666667	0.666667	2.33333	19	0	11.6667	1	1	6	4	1.33333	21	p__unclassified_k__Fungi	g__unclassified_k__Fungi	-	-
OTU1659	0.333333	0	0.333333	0	0.666667	8.66667	0	0	0	0.333333	0	0	71	0.666667	p__unclassified_k__Fungi	g__unclassified_k__Fungi	-	-
OTU233	0.666667	16	28.3333	21.6667	0	15	0	0	0	0	0	0	0	0	p__Zygomycota	g__Mortierella	Saprotroph-Symbiotroph	Endophyte-Litter Saprotroph-Soil Saprotroph-Undefined Saprotroph
OTU887	0.666667	7.66667	11.6667	5.66667	0.333333	0.666667	0	48.3333	1.66667	0	0	0.666667	2.66667	0	p__Ascomycota	g__unclassified_o__Pleosporales	-	-
OTU1665	0	17	0	0	0	0	0	0	0	0.333333	6	0.333333	0	55.6667	p__Ascomycota	g__Schizothecium	Saprotroph	Dung Saprotroph
OTU569	0	4.66667	0	0	13.3333	49	6.33333	3.66667	1.33333	0	0.333333	0	0	0	p__Basidiomycota	g__Melanophyllum	Saprotroph	Undefined Saprotroph
OTU1459	1	10	0	1.33333	0	19	0	4.33333	1.66667	0	2	23.3333	14	1.33333	p__Ascomycota	g__Chrysosporium	Saprotroph	Dung Saprotroph-Soil Saprotroph
OTU413	2.33333	18.3333	3	5.66667	5.66667	26	0	7.66667	2	0	0	1.33333	3	2.33333	p__Ascomycota	g__unclassified_p__Ascomycota	-	-
OTU1776	0	0	0	0	0	0	0	2	0	0	0	0	0	74.3333	p__Ascomycota	g__Chaetomium	Pathotroph-Saprotroph-Symbiotroph	Animal Pathogen-Dung Saprotroph-Endophyte-Epiphyte-Plant Saprotroph-Wood Saprotroph
OTU888	7.66667	24.3333	0	7.33333	1.66667	0	0	6.66667	15.3333	0	8.66667	2.33333	0	2.33333	p__unclassified_k__Fungi	g__unclassified_k__Fungi	-	-
OTU1279	0	0	0.666667	0	2.66667	0	0	0.333333	1.33333	64	0.333333	3	0	3.66667	p__unclassified_k__Fungi	g__unclassified_k__Fungi	-	-
OTU1309	0	0	0	24	0.333333	26.6667	0	0.666667	9	10	3.33333	1.66667	0	0	p__Ascomycota	g__Acremonium	Pathogen-Saprotroph-Symbiotroph	Animal Pathogen-Endophyte-Fungal Parasite-Plant Pathogen-Wood Saprotroph
OTU726	74.3333	0	0	0	0	0	1.33333	0	0	0	0	0	0	0	p__Ascomycota	g__Oidiodendron	Pathotroph-Symbiotroph	Ericoid Mycorrhizal
OTU1865	2	0.333333	0.333333	0.666667	0	0	33	14.6667	22.3333	0	0	1.66667	0.333333	0	p__Ascomycota	g__Kernia	Saprotroph	Dung Saprotroph-Undefined Saprotroph
OTU1570	0.666667	0	0	7.33333	3.66667	35	3.33333	10.3333	4.66667	3	0.666667	1.33333	3.33333	2	p__Ascomycota	g__Gliomastix	Saprotroph	Undefined Saprotroph
OTU373	0	0	2.33333	68.6667	0.333333	0	0	0	0	3	0	0	0	0	p__Ascomycota	g__unclassified_c__Dothideomycetes	-	-
OTU1605	1.33333	24.6667	2.66667	2	1.66667	7	12.6667	2.33333	1.66667	0	5.66667	2.33333	8	2	p__Zygomycota	g__Mortierella	Saprotroph-Symbiotroph	Endophyte-Litter Saprotroph-Soil Saprotroph-Undefined Saprotroph
OTU1176	0	0	0	0	0	0	0	0	0	73.6667	0	0	0	0	p__unclassified_k__Fungi	g__unclassified_k__Fungi	-	-
OTU1989	9.33333	0.666667	5.33333	3	2.33333	3.66667	0	8	6	8	3.66667	8.33333	0	15.3333	p__unclassified_k__Fungi	g__unclassified_k__Fungi	-	-
OTU935	0.333333	19.3333	0.666667	13	0	0	0	17	0.666667	0.666667	0	1	20.6667	0	p__Ascomycota	g__unclassified_f__Nectriaceae	Saprotroph	Undefined Saprotroph
OTU208	8.66667	6.66667	2.33333	9.66667	0	37.3333	2.33333	1	0.666667	0	1.33333	3	0	0	p__Ascomycota	g__Acremonium	Pathogen-Saprotroph-Symbiotroph	Animal Pathogen-Endophyte-Fungal Parasite-Plant Pathogen-Wood Saprotroph
OTU147	0	14.3333	45.6667	0	0	1.66667	1	4.66667	2.66667	0	0	0	2.66667	0	p__Ascomycota	g__unclassified_c__Sordariomycetes	-	-
OTU313	0	0	0	72.3333	0	0	0	0	0	0	0.333333	0	0	0	p__Ascomycota	g__Myrothecium	Saprotroph	Undefined Saprotroph
OTU723	12.3333	0	4	2	0	0	5.33333	1.33333	1.33333	0	45	0.333333	0.333333	0.666667	p__Ascomycota	g__Cladophialophora	Saprotroph	Undefined Saprotroph
OTU831	0.333333	0	1	1.66667	2.33333	3.66667	52	1.33333	0	0	6.33333	0	3.66667	0	p__Ascomycota	g__Microdochium	Pathotroph-Symbiotroph	Endophyte-Plant Pathogen
OTU37	1.66667	20	1.66667	21.3333	2.33333	0	0	0	25.3333	0	0	0	0	0	p__Ascomycota	g__unclassified_c__Sordariomycetes	-	-
OTU157	0.333333	0	4.33333	2.33333	0.666667	0	0	0.333333	13	3	33	0.666667	0	13.6667	p__Ascomycota	g__unclassified_o__Xylariales	-	-
OTU1587	0	48.3333	0.333333	5.66667	1	0	0	5.33333	0	0	0	0	10.6667	0	p__Ascomycota	g__Schizothecium	Saprotroph	Dung Saprotroph
OTU1131	0	0.333333	0	0	0	38.6667	0	0	0	15	16	0	0	0	p__Ascomycota	g__Fusarium	Pathotroph-Saprotroph-Symbiotroph	Animal Pathogen-Endophyte-Lichen Parasite-Plant Pathogen-Soil Saprotroph-Wood Saprotroph
OTU1652	0.333333	0	0	55	0	0	0	0	1	2.33333	2.33333	2.33333	3	3	p__unclassified_k__Fungi	g__unclassified_k__Fungi	-	-
OTU734	57.3333	5.33333	0	0	6.33333	0	0	0	0	0	0	0	0	0	p__Ascomycota	g__Monodictys	Pathotroph-Saprotroph-Symbiotroph	Endophyte-Lichen Parasite-Wood Saprotroph
OTU582	4.66667	0.333333	1	1.33333	0.333333	55	0.333333	0.333333	0.333333	0.666667	4	0	0	0	p__Ascomycota	g__unclassified_p__Ascomycota	-	-
OTU5	0	28	3.66667	19	0.666667	0	2	0.333333	0	0	12	0	2.33333	0	p__unclassified_k__Fungi	g__unclassified_k__Fungi	-	-
OTU1621	0	0	0	0	0	0.333333	0	0	0	4.33333	20.3333	40	2.66667	0	p__Ascomycota	g__Trichoderma	Saprotroph	Undefined Saprotroph
OTU1753	13	0.333333	1	0.666667	0	3.66667	0.333333	0.666667	1	3	8.66667	2.66667	1.33333	30.6667	p__Ascomycota	g__unclassified_p__Ascomycota	-	-
OTU161	10.3333	1.66667	1.33333	0.333333	1	2.66667	0	0	1.33333	0	40	1.33333	4.66667	2.33333	p__Ascomycota	g__unclassified_c__Sordariomycetes	-	-
OTU341	0	0	0	56.6667	1.33333	0	0	2.33333	0	2.33333	1.66667	1	0	0.666667	p__Basidiomycota	g__Cryptococcus	Pathotroph-Saprotroph-Symbiotroph	Fungal Parasite-Undefined Saprotroph
OTU718	57	0	0.333333	0	0.333333	0	0	0.333333	0	0	3.66667	3	0	1	p__Ascomycota	g__Talaromyces	Saprotroph	Undefined Saprotroph
OTU1732	1.66667	6	2	7	7.66667	1.66667	1.33333	3	4.66667	8.66667	4.66667	6.66667	3	7.33333	p__Ascomycota	g__Fusarium	Pathotroph-Saprotroph-Symbiotroph	Animal Pathogen-Endophyte-Lichen Parasite-Plant Pathogen-Soil Saprotroph-Wood Saprotroph
OTU855	0	1.33333	0	0	0	0	49	7	8	0	0	0	0	0	p__Ascomycota	g__unclassified_o__Pleosporales	-	-
OTU392	0	24	0.666667	1.33333	7	0	0	2	28.6667	1.33333	0	0	0	0	p__Ascomycota	g__unclassified_f__Lasiosphaeriaceae	Saprotroph	Undefined Saprotroph
OTU308	0	0	0	39	0	11	4.33333	1	0	0	1.33333	2.33333	6	0	p__Ascomycota	g__Podosordaria	Saprotroph	Undefined Saprotroph
OTU1245	0	0	0	0	0	0	0	0	0	64.6667	0	0	0	0	p__Ascomycota	g__unclassified_c__Sordariomycetes	-	-
OTU547	0	0	0	0	0	50.6667	0	0	0	0	0	0	13.6667	0	p__unclassified_k__Fungi	g__unclassified_k__Fungi	-	-
OTU377	0	0.666667	7.66667	53.6667	0	0	0	0.333333	0	1.66667	0	0	0	0	p__Ascomycota	g__unclassified_p__Ascomycota	-	-
OTU1991	2	0	1.33333	2.66667	1	13.6667	20.6667	5.33333	2	0	0	0	15.3333	0	p__Ascomycota	g__unclassified_f__Microascaceae	Pathotroph-Saprotroph-Symbiotroph	Animal Pathogen-Endophyte-Plant Pathogen-Undefined Saprotroph
OTU146	0	1.66667	30.3333	7.33333	3	0	0.333333	4.66667	0	16.6667	0	0	0	0	p__Ascomycota	g__unclassified_p__Ascomycota	-	-
OTU286	0	0	0	13	0	0.666667	0	0	0	0	0.666667	48.3333	0	0	p__Ascomycota	g__unclassified_c__Pezizomycetes	-	-
OTU1552	0.333333	12.3333	0	0	0	2.33333	0	0	0.333333	0	0	0	47	0	p__Ascomycota	g__Gymnoascus	Saprotroph	Undefined Saprotroph
OTU1027	1.33333	26.6667	0.333333	3.33333	0.666667	2.33333	0	9.33333	2.66667	0	5	0.333333	0	10	p__Ascomycota	g__unclassified_p__Ascomycota	-	-
OTU977	1.33333	0	0	14.3333	0.666667	0	40.6667	0.666667	0	0	0	0.666667	2.66667	0	p__Ascomycota	g__Trichoderma	Saprotroph	Undefined Saprotroph
OTU2	4	19.3333	2	8.66667	1.33333	3	3	6.33333	4	2	2.33333	2	1.33333	1.66667	p__Ascomycota	g__Gibberella	Pathotroph	Plant Pathogen
OTU433	0	0	0	0	2	0	33.6667	0	0	23.6667	0.666667	0.333333	0	0	p__unclassified_k__Fungi	g__unclassified_k__Fungi	-	-
OTU516	0	5.66667	0.333333	0.666667	0.666667	22	5	9.33333	10.6667	0	0.333333	0.333333	0	5.33333	p__Ascomycota	g__unclassified_o__Hypocreales	Saprotroph	Undefined Saprotroph
OTU159	8.33333	16.3333	7.33333	1.33333	0	2.66667	0	0.333333	6.33333	2.66667	1	3.66667	10.3333	0	p__Ascomycota	g__Kernia	Saprotroph	Dung Saprotroph-Undefined Saprotroph
OTU45	0	25.6667	0	0	0	0	0	27	0	0	0	0	7	0	p__Ascomycota	g__Neurospora	Saprotroph	Undefined Saprotroph
OTU1495	0.333333	0	0.333333	0.666667	0	0.666667	0	0	0	0	2.33333	38.6667	0	16.3333	p__Ascomycota	g__unclassified_f__Mycosphaerellaceae	Pathotroph-Saprotroph	Plant Pathogen-Undefined Saprotroph
OTU75	1.33333	14.3333	0	0	1	0	0	4.66667	8	0	0	0	0	30	p__Ascomycota	g__Acremonium	Pathogen-Saprotroph-Symbiotroph	Animal Pathogen-Endophyte-Fungal Parasite-Plant Pathogen-Wood Saprotroph
OTU1105	0	0	0	1	0	0	0	18	39.3333	0	0	0	1	0	p__Basidiomycota	g__Mrakiella	-	-
OTU1686	12	1	0	0	0	36.3333	0	1.33333	0	0	0	0	0	7.66667	p__Ascomycota	g__Monodictys	Pathotroph-Saprotroph-Symbiotroph	Endophyte-Lichen Parasite-Wood Saprotroph
OTU805	0	3.66667	0	3	0.666667	0	38.6667	0	0	0	0	0	12	0	p__Ascomycota	g__Remersonia	-	-
OTU280	0	0	0	56.6667	1.33333	0	0	0	0	0	0	0	0	0	p__Ascomycota	g__Myrmecridium	Saprotroph	Undefined Saprotroph
OTU30	0	57.6667	0	0	0	0	0	0	0	0	0	0	0	0	p__Ascomycota	g__Sporormiella	Saprotroph	Undefined Saprotroph
OTU1297	0	0.666667	1.33333	3.66667	0.666667	1.33333	0	4.33333	0	42	0	0	2	0.666667	p__Basidiomycota	g__Cryptococcus	Pathotroph-Saprotroph-Symbiotroph	Fungal Parasite-Undefined Saprotroph
OTU1544	0	0.333333	0	0.333333	0.333333	12.3333	0	0.666667	1.66667	0	0	2.66667	37.6667	0	p__unclassified_k__Fungi	g__unclassified_k__Fungi	-	-
OTU1008	0	1.66667	0	7	0	0	0	17.3333	23	0	3.33333	0	0	3.66667	p__Ascomycota	g__unclassified_o__Pezizales	-	-
OTU1319	0.666667	2.66667	2.66667	0.333333	1.33333	13	7.33333	4.66667	0.666667	11.3333	0	3	1	7.33333	p__Ascomycota	g__Gibberella	Pathotroph	Plant Pathogen
OTU2010	2.66667	1.33333	2	17	0	0	0	19.3333	6.33333	2.33333	4.33333	0	0.333333	0	p__Ascomycota	g__unclassified_f__Nectriaceae	Saprotroph	Undefined Saprotroph
OTU989	0	0	0	52.3333	0	0	0	2.33333	0	0	0	0	0	0	p__Ascomycota	g__Staphylotrichum	Saprotroph	Undefined Saprotroph
OTU38	1	28	0.333333	3.66667	0	0	17	1	0.666667	0	2.66667	0	0	0	p__Ascomycota	g__Bradymyces	-	-
OTU1230	0	1.33333	0.333333	3.66667	2	0	26.6667	0	2	16	0	0.333333	0	0.333333	p__Ascomycota	g__Torula	Pathotroph-Saprotroph	Endophyte-Plant Pathogen-Wood Saprotroph
OTU960	18	1.33333	1.66667	0	0	6	10.6667	6.33333	0.666667	0	0.333333	7.33333	0	0.333333	p__Ascomycota	g__Chaetomium	Pathotroph-Saprotroph-Symbiotroph	Animal Pathogen-Dung Saprotroph-Endophyte-Epiphyte-Plant Saprotroph-Wood Saprotroph
OTU1803	4	1	1.33333	3.66667	2.33333	13	0	1.33333	2	1.33333	12	8.33333	0	2.33333	p__Ascomycota	g__Auxarthron	Saprotroph	Dung Saprotroph-Soil Saprotroph
OTU71	4.66667	27.6667	1.66667	5.66667	0.333333	0	1.33333	1	5.66667	0.666667	0.666667	1	0.666667	1.33333	p__unclassified_k__Fungi	g__unclassified_k__Fungi	-	-
OTU185	0.666667	0	4.66667	0	0.333333	0	0	0	14.6667	21	6	5	0	0	p__Ascomycota	g__Cephaliophora	-	-
OTU1788	0	0	0	0	0	0	0	0	18	0	0	0	0	33.6667	p__Ascomycota	g__Acrocalymma	Saprotroph	Undefined Saprotroph
OTU975	0	0	0	0	0	0	0	51.6667	0	0	0	0	0	0	p__Zygomycota	g__Basidiobolus	Pathotroph-Saprotroph-Symbiotroph	Animal Endosymbiont-Animal Pathogen-Undefined Saprotroph
OTU1956	26.3333	0	0	7.66667	0	0.333333	6	0.333333	8.33333	1.66667	0	0.666667	0.333333	0	p__Ascomycota	g__Purpureocillium	Pathotroph	Fungal Parasite
OTU771	51	0	0	0	0	0	0	0	0	0	0	0	0	0	p__Ascomycota	g__unclassified_c__Sordariomycetes	-	-
OTU133	0	0	12.6667	28	0	0	0	2.66667	0	0	0	2	0	5.33333	p__Ascomycota	g__Mycoarthris	Saprotroph	Undefined Saprotroph
OTU694	2.33333	0	5	1.66667	0.666667	8.66667	0	1.33333	3.33333	1.33333	4	1	18.6667	2.33333	p__unclassified_k__Fungi	g__unclassified_k__Fungi	-	-
OTU1629	0	0	0	0	0	0	0	0	0	0	0	0	49.6667	0	p__Ascomycota	g__Colletotrichum	Pathotroph-Symbiotroph	Endophyte-Plant Pathogen
OTU2032	37	0.333333	0	1	0	0	0	3.66667	3.33333	0	0	2	1.33333	1	p__Ascomycota	g__Acremonium	Pathogen-Saprotroph-Symbiotroph	Animal Pathogen-Endophyte-Fungal Parasite-Plant Pathogen-Wood Saprotroph
OTU1004	1.33333	13	0	0	3.33333	0	0	0	27	4.66667	0	0	0	0	p__Ascomycota	g__unclassified_f__norank_o__Trichosphaeriales	-	-
OTU1287	24.3333	0	2.33333	2	3.66667	1.66667	0	0	4.66667	1.66667	1	5.66667	0.666667	1.66667	p__Ascomycota	g__Scytalidium	Saprotroph	Wood Saprotroph
OTU1672	1.66667	0	0	0	0	1.66667	0	4	0	5.33333	0	2.33333	0	34.3333	p__Ascomycota	g__Arachnomyces	Saprotroph	Dung Saprotroph
OTU439	0	0	0	0	41.6667	0	0	0	0	7.33333	0	0	0	0	p__Basidiomycota	g__unclassified_c__Agaricomycetes	-	-
OTU285	0	2.33333	10	10.6667	1.33333	1.66667	2	3.66667	7.33333	0	0.666667	2	7.33333	0	p__unclassified_k__Fungi	g__unclassified_k__Fungi	-	-
OTU1558	0.666667	0.666667	0	1	0	0	19	0	0	0	0	1.33333	26	0.333333	p__unclassified_k__Fungi	g__unclassified_k__Fungi	-	-
OTU1476	0.333333	5.66667	1	3	1.33333	0	0	0	0.666667	0	28.6667	7.66667	0	0	p__Zygomycota	g__Mortierella	Saprotroph-Symbiotroph	Endophyte-Litter Saprotroph-Soil Saprotroph-Undefined Saprotroph
OTU736	9.66667	0	4.66667	0	0	33.6667	0	0	0	0	0	0	0	0	p__Zygomycota	g__Mortierella	Saprotroph-Symbiotroph	Endophyte-Litter Saprotroph-Soil Saprotroph-Undefined Saprotroph
OTU1620	1	6.33333	1.66667	0.333333	1	0	7.33333	14	0	0	0	0	16.3333	0	p__Ascomycota	g__unclassified_c__Sordariomycetes	-	-
OTU1251	0.333333	0	0	0	0	0	0	0	0	47.3333	0	0	0	0	p__Ascomycota	g__unclassified_f__Lasiosphaeriaceae	Saprotroph	Undefined Saprotroph
OTU1126	4.66667	0	1.66667	0	0	0	0	1.33333	0	30.6667	8.66667	0	0	0	p__Ascomycota	g__Chaetomium	Pathotroph-Saprotroph-Symbiotroph	Animal Pathogen-Dung Saprotroph-Endophyte-Epiphyte-Plant Saprotroph-Wood Saprotroph
OTU1792	0	1.33333	1.66667	4.33333	0.333333	17.3333	8.33333	3.33333	2.33333	1	1.66667	3.66667	1.33333	0	p__Ascomycota	g__Penicillium	Saprotroph	Undefined Saprotroph
OTU434	1.66667	0	18.6667	2	21.3333	0	2.66667	0	0	0	0	0	0	0	p__Ascomycota	g__unclassified_f__Lasiosphaeriaceae	Saprotroph	Undefined Saprotroph
OTU1098	14	0	2	2	0.666667	0	0	2.33333	9	0.333333	0.333333	0	2.66667	13	p__Ascomycota	g__unclassified_c__Sordariomycetes	-	-
OTU865	0	0	0	0	0	0	0	46.3333	0	0	0	0	0	0	p__Ascomycota	g__unclassified_p__Ascomycota	-	-
OTU1566	8.66667	7.33333	0	11.6667	2.33333	5.66667	0	0	1.33333	0	0.333333	1.66667	7	0	p__Ascomycota	g__Humicola	Saprotroph	Undefined Saprotroph-Wood Saprotroph
OTU699	35.3333	0	0	0.666667	0	0	0	0	1.66667	0	0	0	0	8.33333	p__Ascomycota	g__unclassified_o__Sordariales	-	-
OTU1883	24.3333	0	1	0.666667	0	0	0	9.33333	9	0	0	1	0.666667	0	p__Ascomycota	g__Microascus	Pathotroph-Saprotroph-Symbiotroph	Animal Pathogen-Endophyte-Plant Pathogen-Undefined Saprotroph
OTU349	0	11	0	15.6667	4	0	0	1	2.33333	11.3333	0	0	0	0	p__Ascomycota	g__Cordyceps	Pathotroph-Symbiotroph	Animal Pathogen-Clavicipitaceous Endophyte-Fungal Parasite
OTU245	0	0	0	45.3333	0	0	0	0	0	0	0	0	0	0	p__Basidiomycota	g__unclassified_f__Thelephoraceae	Saprotroph-Symbiotroph	Ectomycorrhizal-Undefined Saprotroph
OTU1906	9	0.333333	0	2	0.666667	2	6.66667	3	3	13	3	2	0.333333	0	p__Ascomycota	g__Chaetomium	Pathotroph-Saprotroph-Symbiotroph	Animal Pathogen-Dung Saprotroph-Endophyte-Epiphyte-Plant Saprotroph-Wood Saprotroph
OTU442	0	0	0	0	42	0	0	0	0	0	0	0	3	0	p__Ascomycota	g__Nectria	Pathotroph-Saprotroph-Symbiotroph	Animal Pathogen-Endophyte-Fungal Parasite-Lichen Parasite-Plant Pathogen-Wood Saprotroph
OTU1174	0	0	0	0	0	0	0	0	0	44.3333	0	0	0	0	p__Ascomycota	g__Hirsutella	Pathotroph	Animal Pathogen
OTU1618	0	0	0	0	0	0	0	0	0	0	0	0	44	0	p__unclassified_k__Fungi	g__unclassified_k__Fungi	-	-
OTU252	0	0	0	43.6667	0	0	0	0	0	0	0	0	0	0	p__Ascomycota	g__unclassified_o__Pezizales	-	-
OTU1588	4.66667	2.66667	0	0	1.33333	0.333333	5.66667	0.666667	0	0	0	1	27.3333	0	p__Ascomycota	g__Arthrographis	Saprotroph	Undefined Saprotroph
OTU758	26.6667	1	1	1.66667	0	0	0	3.33333	1.33333	0	0	0	5.33333	2	p__Ascomycota	g__Cephalotrichiella	-	-
OTU1395	20.3333	0	0.333333	2.66667	0	0	0	0	0	0	14.3333	3.33333	1.33333	0	p__Basidiomycota	g__Rhodotorula	Pathotroph-Saprotroph	Animal Endosymbiont-Animal Pathogen-Endophyte-Plant Pathogen-Undefined Saprotroph
OTU1556	0	0	0	0	0	0	0	0	0	0	0	0	42	0	p__unclassified_k__Fungi	g__unclassified_k__Fungi	-	-
OTU1091	0	0	0	0	0	0	0	1.66667	40.3333	0	0	0	0	0	p__Ascomycota	g__Penicillium	Saprotroph	Undefined Saprotroph
OTU1965	1.33333	9.33333	0.333333	1.66667	4.33333	0	0	5.66667	1	0.333333	3.33333	5	1.33333	8	p__Zygomycota	g__Mortierella	Saprotroph-Symbiotroph	Endophyte-Litter Saprotroph-Soil Saprotroph-Undefined Saprotroph
OTU676	23.3333	0	0	2.33333	0	9.66667	0	0	0	6	0	0.333333	0	0	p__Chytridiomycota	g__Spizellomyces	Pathotroph	Plant Pathogen-Undefined Parasite-Undefined Saprotroph
OTU536	0.333333	0	0	2	0	39	0	0	0	0	0	0	0	0	p__unclassified_k__Fungi	g__unclassified_k__Fungi	-	-
OTU1075	5	0.333333	3.33333	5.66667	0	1.33333	0.666667	0	9.33333	0	8.33333	2	1.66667	3.66667	p__Ascomycota	g__Auxarthron	Saprotroph	Dung Saprotroph-Soil Saprotroph
OTU248	0	0	0	35	0	0	0	0	0.666667	5.33333	0	0	0	0	p__Ascomycota	g__unclassified_p__Ascomycota	-	-
OTU529	2.33333	0	1.66667	3.66667	1.66667	15.3333	1.33333	2.33333	2.33333	0	2	2	4.33333	2	p__unclassified_k__Fungi	g__unclassified_k__Fungi	-	-
OTU316	0	1.66667	0	39	0	0	0	0	0	0	0	0	0	0	p__Basidiomycota	g__unclassified_f__Thelephoraceae	Saprotroph-Symbiotroph	Ectomycorrhizal-Undefined Saprotroph
OTU197	1	0	0	27	0	0	0	0.666667	0	6.33333	5.66667	0	0	0	p__unclassified_k__Fungi	g__unclassified_k__Fungi	-	-
OTU1352	1	3.66667	0	0	0.666667	12	0	1	2.33333	2.33333	1	3.33333	1.66667	11.3333	p__unclassified_k__Fungi	g__unclassified_k__Fungi	-	-
OTU1568	0	0.333333	0	0	1.33333	0	0	0.666667	0.333333	8.33333	0	0	28.6667	0	p__Ascomycota	g__Stagonospora	Pathotroph	Plant Pathogen
OTU1276	0	0	0	0	0	0	0	0	0	39.3333	0	0	0	0	p__Ascomycota	g__Myrothecium	Saprotroph	Undefined Saprotroph
OTU1189	1.33333	4.66667	0.666667	5	0	3.66667	0	1	0.333333	12	2.33333	5.66667	0	2	p__Ascomycota	g__Zygopleurage	Saprotroph	Dung Saprotroph
OTU739	11	0	0	0.333333	0	0	0	0	0	0	4.33333	3.33333	0	19	p__Ascomycota	g__unclassified_p__Ascomycota	-	-
OTU1448	0.666667	3	0	3	3	0	2	0.333333	0	0	1.66667	12	0	12.3333	p__Ascomycota	g__unclassified_p__Ascomycota	-	-
OTU1545	0.333333	1.66667	0	0	0	11.6667	0.333333	1.33333	0	0	1	4	13.6667	3.66667	p__Ascomycota	g__Chrysosporium	Saprotroph	Dung Saprotroph-Soil Saprotroph
OTU66	0	37	0	0	0	0	0	0	0	0	0	0.333333	0.333333	0	p__Ascomycota	g__unclassified_p__Ascomycota	-	-
OTU659	20	0	0	12	0.333333	0	0	1	1	0	2.66667	0.333333	0	0	p__Ascomycota	g__Podospora	Saprotroph-Symbiotroph	Dung Saprotroph-Endophyte-Litter Saprotroph-Undefined Saprotroph
OTU338	3.66667	0	2.66667	20.3333	1.33333	0.666667	0	0.666667	0.666667	1.33333	0.666667	1	1	3.33333	p__Ascomycota	g__Tetracladium	Saprotroph	Undefined Saprotroph
OTU1725	0	0	0	0	0	0	0	0	0	0	1.33333	0	0	35.3333	p__unclassified_k__Fungi	g__unclassified_k__Fungi	-	-
OTU502	0.666667	0	0	30.6667	0.666667	3	0	0.333333	0	0	0	0	0.666667	0	p__Ascomycota	g__Stilbella	Saprotroph-Symbiotroph	Dung Saprotroph-Endophyte-Wood Saprotroph
OTU232	6.33333	0	1.33333	16.6667	0	0.333333	0	0.666667	1	2.33333	0.666667	4.66667	0	1.66667	p__Ascomycota	g__unclassified_f__Chaetomiaceae	Pathotroph-Saprotroph-Symbiotroph	Animal Pathogen-Dung Saprotroph-Endophyte-Epiphyte-Plant Saprotroph-Wood Saprotroph
OTU1017	1.66667	0	1.33333	14	1.33333	0	0	0	0.666667	2.33333	3.33333	6	0	5	p__Ascomycota	g__unclassified_c__Dothideomycetes	-	-
OTU1389	1.66667	0	0	16	0	14	0	1	0.333333	0.666667	1	0.666667	0	0	p__unclassified_k__Fungi	g__unclassified_k__Fungi	-	-
OTU1708	2.66667	0	0	3.33333	2.33333	0.666667	0	0	5.66667	0	11.6667	6.33333	0	2.33333	p__unclassified_k__Fungi	g__unclassified_k__Fungi	-	-
OTU921	0	0	0	2.66667	2	0	0	30	0	0.333333	0	0	0	0	p__Chytridiomycota	g__unclassified_o__Spizellomycetales	-	-
OTU25	0	33.6667	0	0	0	0	0	0	0	0	0	0.666667	0	0	p__unclassified_k__Fungi	g__unclassified_k__Fungi	-	-
OTU1269	0	0	0	0	0	0	0	0	1	33	0	0.333333	0	0	p__unclassified_k__Fungi	g__unclassified_k__Fungi	-	-
OTU1720	0.666667	8.66667	2.66667	4	1.33333	0	0.333333	3.33333	1	4	0.666667	1.33333	2.33333	4	p__Ascomycota	g__Gibberella	Pathotroph	Plant Pathogen
OTU1198	0	0	0	0	0	0	0	0	0	34	0	0	0	0	p__Ascomycota	g__Neosetophoma	Saprotroph	Undefined Saprotroph
OTU1608	0	0	1	16	2	0	0	0	0	4	7.33333	0	3.66667	0	p__Ascomycota	g__Myrmecridium	Saprotroph	Undefined Saprotroph
OTU388	0	0	0	0	15.6667	0	0	0.333333	0	1.33333	0.333333	16	0	0	p__Ascomycota	g__unclassified_o__Hypocreales	Saprotroph	Undefined Saprotroph
OTU586	0	0	0	0.333333	0	33	0	0	0	0	0	0	0	0	p__unclassified_k__Fungi	g__unclassified_k__Fungi	-	-
OTU95	1.66667	12.3333	0	0	0	8.33333	8.33333	0	0	0	0	2.33333	0.333333	0	p__Ascomycota	g__unclassified_p__Ascomycota	-	-
OTU204	0	0	0	32.6667	0	0	0	0	0.333333	0	0	0	0	0	p__Ascomycota	g__unclassified_c__Sordariomycetes	-	-
OTU1557	0	0	0	0	0	0	0	0	0	0	0	0	33	0	p__unclassified_k__Fungi	g__unclassified_k__Fungi	-	-
OTU477	0.333333	1	0.333333	3	2.66667	17.6667	0	0	1.33333	0.333333	2.66667	0.333333	3	0	p__unclassified_k__Fungi	g__unclassified_k__Fungi	-	-
OTU1033	0	0	0	0	0	0	0	0	32.6667	0	0	0	0	0	p__unclassified_k__Fungi	g__unclassified_k__Fungi	-	-
OTU324	0	4.33333	8.33333	20	0	0	0	0	0	0	0	0	0	0	p__Basidiomycota	g__Cystofilobasidium	Saprotroph	Leaf Saprotroph
OTU362	0.333333	7	0	6.66667	0	0	0	6.66667	0.666667	0.666667	0	0.333333	10	0	p__Ascomycota	g__unclassified_f__Nectriaceae	Saprotroph	Undefined Saprotroph
OTU622	0	0	0	0	0	32.3333	0	0	0	0	0	0	0	0	p__Ascomycota	g__unclassified_f__Sporormiaceae	Saprotroph	Dung Saprotroph-Plant Saprotroph
OTU1040	0	0	0	0	0	0	0	0	29.3333	0	0	0.666667	0	2.33333	p__Ascomycota	g__Arthrographis	Saprotroph	Undefined Saprotroph
OTU1079	0	0	0	1	0	0	0.666667	0	0.666667	29.6667	0	0	0	0	p__Ascomycota	g__unclassified_f__Montagnulaceae	Pathotroph-Saprotroph	Fungal Parasite-Plant Pathogen-Undefined Saprotroph
OTU278	0	0	0	32	0	0	0	0	0	0	0	0	0	0	p__Zygomycota	g__Ramicandelaber	Saprotroph	Undefined Saprotroph
OTU1064	0	0	0	0	0	0	0	0	17	0	0	0	0	15	p__unclassified_k__Fungi	g__unclassified_k__Fungi	-	-
OTU1310	0	0	0	0	0	0	0	0	0	32	0	0	0	0	p__unclassified_k__Fungi	g__unclassified_k__Fungi	-	-
OTU558	0.333333	0	4.66667	2	0	10	0	1.33333	0	1.33333	0	5.33333	4	2.66667	p__Ascomycota	g__Ctenomyces	Saprotroph	Dung Saprotroph-Undefined Saprotroph
OTU405	6	0	0	12.6667	9	0	0	0.666667	0.333333	2	0	0.666667	0	0	p__Ascomycota	g__unclassified_p__Ascomycota	-	-
OTU1070	1.66667	0.666667	0.333333	1.66667	0.333333	0	0	1.33333	24	0	0.333333	0.666667	0	0.333333	p__unclassified_k__Fungi	g__unclassified_k__Fungi	-	-
OTU874	2.33333	3.66667	0	0.666667	1.33333	2.33333	0	8	3.33333	0	0.333333	6	0	3.33333	p__Ascomycota	g__unclassified_f__Ceratostomataceae	Pathotroph-Saprotroph	Fungal Parasite-Plant Saprotroph-Soil Saprotroph
OTU764	13.6667	0.333333	0	0	0	0	0	0	0	16.6667	0	0	0	0.333333	p__Ascomycota	g__unclassified_f__Montagnulaceae	Pathotroph-Saprotroph	Fungal Parasite-Plant Pathogen-Undefined Saprotroph
OTU1378	0	0	0	0.333333	0	0	0	0	0	0	30.6667	0	0	0	p__Ascomycota	g__unclassified_o__Hypocreales	Saprotroph	Undefined Saprotroph
OTU1594	0.666667	3.66667	0.333333	1.33333	0	18.6667	0	0	0.333333	0	0	1.66667	3	1.33333	p__Ascomycota	g__Kernia	Saprotroph	Dung Saprotroph-Undefined Saprotroph
OTU626	0	0	0	0	0	31	0	0	0	0	0	0	0	0	p__Ascomycota	g__unclassified_f__Halosphaeriaceae	Saprotroph	Undefined Saprotroph-Wood Saprotroph
OTU14	3	12.3333	2.66667	3.66667	0	7.66667	0	0	1	0	0	0	0	0	p__Ascomycota	g__unclassified_f__Lasiosphaeriaceae	Saprotroph	Undefined Saprotroph
OTU141	0	19.3333	8	3	0	0	0	0	0	0	0	0	0	0	p__Ascomycota	g__Tetracladium	Saprotroph	Undefined Saprotroph
OTU1561	0	0	0	0	0	0	0	9.33333	0	0	0	0	20.6667	0	p__Ascomycota	g__Scedosporium	Saprotroph	Undefined Saprotroph
OTU1649	0	0.666667	2.33333	0	0.333333	0	1.33333	0.666667	6	0	0	0	15.6667	3	p__Ascomycota	g__Gymnoascus	Saprotroph	Undefined Saprotroph
OTU1237	0	0	0	0	4	0	0	0	0	26	0	0	0	0	p__Ascomycota	g__unclassified_f__Pleosporaceae	Pathotroph-Saprotroph	Endophyte-Lichen Parasite-Plant Pathogen-Undefined Saprotroph
OTU2011	29.3333	0	0	0	0	0.666667	0	0	0	0	0	0	0	0	p__unclassified_k__Fungi	g__unclassified_k__Fungi	-	-
OTU1039	0	0	0	7	0	0	0	0	22.6667	0	0	0	0	0	p__Ascomycota	g__Leptodiscella	Saprotroph	Undefined Saprotroph
OTU856	0	0	0	2.33333	0	0	0	23.6667	0	0	0	3.66667	0	0	p__Ascomycota	g__Fusicolla	Saprotroph	Undefined Saprotroph
OTU249	5	0	1.33333	9.66667	0.666667	6	0	1.66667	1	2	1.33333	1	0	0	p__unclassified_k__Fungi	g__unclassified_k__Fungi	-	-
OTU1516	0.333333	0	0	1.33333	0	0.333333	0	3.33333	0	3.33333	4.33333	6.66667	7.33333	2.66667	p__Ascomycota	g__Chaetomium	Pathotroph-Saprotroph-Symbiotroph	Animal Pathogen-Dung Saprotroph-Endophyte-Epiphyte-Plant Saprotroph-Wood Saprotroph
OTU1873	0.333333	0	0	0	1.33333	3.66667	0	20.3333	0	1	0.333333	2	0	0.666667	p__Ascomycota	g__Penicillium	Saprotroph	Undefined Saprotroph
OTU306	0	5.33333	1.33333	6	1	0	12	1.33333	0	0	0	0.666667	1.66667	0	p__Ascomycota	g__Acrostalagmus	Saprotroph	Undefined Saprotroph
OTU1183	0	0	0	0	0	0	0	0	0	29.3333	0	0	0	0	p__Ascomycota	g__Coniothyrium	Pathotroph-Saprotroph	Plant Pathogen-Wood Saprotroph
OTU368	8	0	0.666667	6	0.333333	0	0	0	0	14.3333	0	0	0	0	p__Ascomycota	g__Cephaliophora	-	-
OTU1304	0	0	0	2.66667	0.666667	0	0	0	0	22.6667	1.33333	1	0	0	p__Ascomycota	g__unclassified_f__Bionectriaceae	Saprotroph	Undefined Saprotroph
OTU53	2	20.6667	0	0	0.333333	1.33333	0	0.666667	0.333333	0	0	1.66667	0	1	p__Ascomycota	g__unclassified_p__Ascomycota	-	-
OTU1639	0	0	0	0	0	0	0	0.333333	0	0	0	0	27.6667	0	p__unclassified_k__Fungi	g__unclassified_k__Fungi	-	-
OTU1051	0	0	13	0	0	0	0	0	15	0	0	0	0	0	p__Ascomycota	g__unclassified_f__Sclerotiniaceae	Pathotroph	Plant Pathogen
OTU337	0	0	1.33333	1	0	16	0	0	2	3.66667	2.33333	1.66667	0	0	p__Ascomycota	g__Darksidea	Symbiotroph	Endophyte
OTU96	3.33333	9.33333	0	6.66667	0	0	0	4	0	0	1	2	0	1.66667	p__Ascomycota	g__unclassified_p__Ascomycota	-	-
OTU140	3.33333	0	20	0	0.333333	0	0	0.333333	0	0	4	0	0	0	p__unclassified_k__Fungi	g__unclassified_k__Fungi	-	-
OTU307	0	0	0	27.3333	0	0	0	0	0.666667	0	0	0	0	0	p__Basidiomycota	g__Coprinopsis	Saprotroph	Dung Saprotroph-Plant Saprotroph-Wood Saprotroph
OTU843	1.66667	0.666667	0	0	0.333333	6.66667	16.6667	0	0	0	0	0	1.66667	0	p__Ascomycota	g__Ilyonectria	Saprotroph	Undefined Saprotroph
OTU897	0	0	0	0	0	0	0	27.6667	0	0	0	0	0	0	p__unclassified_k__Fungi	g__unclassified_k__Fungi	-	-
OTU1734	1	0	0	0	0	7.33333	9.66667	0.666667	1.66667	0	0	3.66667	2	1.66667	p__Ascomycota	g__unclassified_o__Onygenales	-	-
OTU779	0	0	0	0	0	4	22	0	0	0	0	1.66667	0	0	p__unclassified_k__Fungi	g__unclassified_k__Fungi	-	-
OTU1452	8.33333	0	0	0.333333	0.666667	0	3.66667	0	3.33333	2.66667	5.33333	1	0	2	p__unclassified_k__Fungi	g__unclassified_k__Fungi	-	-
OTU864	0	0	0	0	0	0	0	27.3333	0	0	0	0	0	0	p__Ascomycota	g__unclassified_o__Pezizales	-	-
OTU1847	5.66667	0	0	0	2.66667	0	0	0	0	4	10.6667	4	0	0	p__unclassified_k__Fungi	g__unclassified_k__Fungi	-	-
OTU417	0	0	0	6	16.6667	0	0	1.33333	0	0	3	0	0	0	p__Ascomycota	g__Humicola	Saprotroph	Undefined Saprotroph-Wood Saprotroph
OTU118	0	16	0.333333	9	0	1	0	0	0	0	0	0	0.666667	0	p__Ascomycota	g__Auxarthron	Saprotroph	Dung Saprotroph-Soil Saprotroph
OTU912	0	1.33333	0	0.666667	0	0	0	21.3333	1.66667	1	0	0	1	0	p__Ascomycota	g__unclassified_c__Dothideomycetes	-	-
OTU1527	0	0	0	0	0	0.666667	0	0	0	0	0.333333	25.6667	0	0	p__Ascomycota	g__Cladorrhinum	Pathotroph-Saprotroph-Symbiotroph	Animal Pathogen-Dung Saprotroph-Endophyte-Plant Saprotroph-Soil Saprotroph-Wood Saprotroph
OTU1674	1.33333	0.666667	0	1	0.666667	0	1.33333	4.33333	2	0	0	0	3.66667	11.6667	p__Ascomycota	g__Chrysosporium	Saprotroph	Dung Saprotroph-Soil Saprotroph
OTU421	0.333333	1.33333	0.333333	1	18	0.666667	0.333333	0.333333	0	1.66667	1	0.666667	0.666667	0.333333	p__Ascomycota	g__unclassified_f__Nectriaceae	Saprotroph	Undefined Saprotroph
OTU1308	1	1.33333	0	0.333333	0.666667	0	0	1	0	6	0	0.666667	15	0.666667	p__Basidiomycota	g__Cryptococcus	Pathotroph-Saprotroph-Symbiotroph	Fungal Parasite-Undefined Saprotroph
OTU114	0	22.6667	0	0	0.666667	2.66667	0	0	0	0	0.333333	0	0	0	p__Ascomycota	g__Kernia	Saprotroph	Dung Saprotroph-Undefined Saprotroph
OTU1344	0	0	0	0	0	0	0	0	0	0	26.3333	0	0	0	p__Basidiomycota	g__Laetisaria	Pathotroph	Plant Pathogen
OTU1404	0	0	0	0	0	0	0	0	0	0	26.3333	0	0	0	p__Zygomycota	g__Mortierella	Saprotroph-Symbiotroph	Endophyte-Litter Saprotroph-Soil Saprotroph-Undefined Saprotroph
OTU1129	0	4	0	1	2	0.333333	0	0	3.66667	1.33333	1.66667	12	0	0	p__Ascomycota	g__unclassified_f__Lasiosphaeriaceae	Saprotroph	Undefined Saprotroph
OTU602	0	0	0	0	0	3.66667	1	0.333333	0	0	0	0	21	0	p__Ascomycota	g__Penicillium	Saprotroph	Undefined Saprotroph
OTU483	0	0	0	0	0	26	0	0	0	0	0	0	0	0	p__Ascomycota	g__unclassified_f__Herpotrichiellaceae	Pathotroph-Saprotroph	Animal Pathogen-Fungal Parasite-Undefined Saprotroph
OTU2006	2.33333	0.666667	4.33333	0.333333	0	5	0	5.33333	1.66667	0.666667	0	1	3.33333	1	p__Ascomycota	g__unclassified_f__Ajellomycetaceae	Pathotroph-Saprotroph	Animal Pathogen-Undefined Saprotroph
OTU1032	0.333333	3	0.333333	0	0.333333	6.66667	2	0.333333	1.66667	0.333333	0	0.333333	2.33333	7.66667	p__unclassified_k__Fungi	g__unclassified_k__Fungi	-	-
OTU1195	0	3.33333	2.33333	3.66667	1	0	3	0	0	9	3	0	0	0	p__Ascomycota	g__unclassified_f__Sporormiaceae	Saprotroph	Dung Saprotroph-Plant Saprotroph
OTU325	0	0	0	25.3333	0	0	0	0	0	0	0	0	0	0	p__unclassified_k__Fungi	g__unclassified_k__Fungi	-	-
OTU1311	0	0.666667	0	0	0	0	0	1	0	19.3333	0	0	4.33333	0	p__Ascomycota	g__Coniothyrium	Pathotroph-Saprotroph	Plant Pathogen-Wood Saprotroph
OTU625	0	0	0	0	0	23	2	0	0	0	0	0	0	0	p__unclassified_k__Fungi	g__unclassified_k__Fungi	-	-
OTU1151	0	0	0	0	0	0	0	0	0	24.6667	0	0	0	0	p__Ascomycota	g__Curvularia	Pathotroph	Plant Pathogen
OTU1610	0	0	0	0	0	0	0	8.66667	1.66667	2.33333	0	0	12	0	p__Ascomycota	g__unclassified_p__Ascomycota	-	-
OTU1813	6.66667	0.333333	1.66667	0.333333	0	0	0	12	2.33333	0	0	1.33333	0	0	p__Ascomycota	g__Arthrographis	Saprotroph	Undefined Saprotroph
OTU226	1.33333	0	3	2.66667	0	0	0	3.33333	0.666667	0	10	1.66667	1.33333	0.666667	p__Ascomycota	g__unclassified_p__Ascomycota	-	-
OTU1161	0	0	0	0	0	0	0	0	0	24.3333	0	0	0	0	p__Ascomycota	g__unclassified_o__Hypocreales	Saprotroph	Undefined Saprotroph
OTU1643	0	1.33333	0.666667	0	0	0	0	0	0	0	0	0	22.3333	0	p__Ascomycota	g__Podospora	Saprotroph-Symbiotroph	Dung Saprotroph-Endophyte-Litter Saprotroph-Undefined Saprotroph
OTU1387	0	0	0	17.6667	0	0	0	0	0.666667	0.333333	3.66667	0.666667	0	1	p__unclassified_k__Fungi	g__unclassified_k__Fungi	-	-
OTU1172	0	0	0	0	0	0	21.6667	0	0	2.33333	0	0	0	0	p__Ascomycota	g__Phaeosphaeria	Saprotroph	Undefined Saprotroph
OTU1306	0.333333	0	0	0	0.666667	3.33333	0	0	0	19.6667	0	0	0	0	p__Ascomycota	g__Hydropisphaera	Saprotroph	Undefined Saprotroph
OTU600	0	0	0	0	0	24	0	0	0	0	0	0	0	0	p__unclassified_k__Fungi	g__unclassified_k__Fungi	-	-
OTU1657	2.66667	0.333333	0.333333	4.33333	0.333333	0	4.33333	0.666667	0	0	0	7	1.66667	2.33333	p__Basidiomycota	g__Kurtzmanomyces	Pathotroph-Saprotroph	Fungal Parasite-Undefined Saprotroph
OTU923	0	2	0.333333	0	0.666667	3.66667	4.66667	2.66667	8	0	0	0.333333	0.666667	0.666667	p__Ascomycota	g__Kernia	Saprotroph	Dung Saprotroph-Undefined Saprotroph
OTU42	0	16.6667	1.33333	0	0.333333	0	3	0.333333	1.66667	0	0	0	0	0	p__unclassified_k__Fungi	g__unclassified_k__Fungi	-	-
OTU1635	0.333333	0	2	0.333333	0	0	1.33333	0.333333	0	0	8.33333	2.66667	2.33333	5.66667	p__Zygomycota	g__Mortierella	Saprotroph-Symbiotroph	Endophyte-Litter Saprotroph-Soil Saprotroph-Undefined Saprotroph
OTU631	1	1.66667	0	0.333333	1.33333	5.66667	0	0	0	10.3333	0	0	0	3	p__Ascomycota	g__Eremiomyces	Symbiotroph	Ectomycorrhizal
OTU1880	0	0.333333	0.666667	1	0	0	0	16.3333	0	0	0	0	5	0	p__Ascomycota	g__Aphanoascus	Saprotroph	Dung Saprotroph-Soil Saprotroph
OTU1603	0	0	0	1.66667	0	0.333333	0	0	0	0	2.66667	0	17.6667	0.666667	p__unclassified_k__Fungi	g__unclassified_k__Fungi	-	-
OTU1986	0	0	5	0	0	0	0	0	0	0	0	0	18	0	p__Zygomycota	g__Mortierella	Saprotroph-Symbiotroph	Endophyte-Litter Saprotroph-Soil Saprotroph-Undefined Saprotroph
OTU228	0.666667	0	0	11	0	2	0	3.33333	2.33333	0.333333	0	0	3.33333	0	p__Ascomycota	g__unclassified_p__Ascomycota	-	-
OTU1490	0.333333	2.33333	0.666667	1	2	0	0	2.33333	1.66667	0	6.66667	3	0	2.66667	p__Ascomycota	g__Chaetomium	Pathotroph-Saprotroph-Symbiotroph	Animal Pathogen-Dung Saprotroph-Endophyte-Epiphyte-Plant Saprotroph-Wood Saprotroph
OTU1531	0	0	0	0	0	0	0	0	0	2	0.333333	20.3333	0	0	p__Chytridiomycota	g__Rhizophlyctis	Saprotroph	Undefined Saprotroph
OTU482	0.333333	1	0.333333	0	0	17.6667	0.333333	0	0	0	0	0	2.33333	0.333333	p__Ascomycota	g__unclassified_o__Onygenales	-	-
OTU800	1	0	0	0	0	0	6.66667	1.33333	4.33333	0	0	0	9	0	p__Ascomycota	g__unclassified_f__Microascaceae	Pathotroph-Saprotroph-Symbiotroph	Animal Pathogen-Endophyte-Plant Pathogen-Undefined Saprotroph
OTU946	3.33333	0	0	0	0	0	0	19	0	0	0	0	0	0	p__Ascomycota	g__Triangularia	Saprotroph	Undefined Saprotroph
OTU658	0.666667	1.33333	0.333333	0	0	0	0	0	0.333333	0	0	1.33333	18.3333	0	p__Ascomycota	g__unclassified_o__Sordariales	-	-
OTU2021	0	0	0.333333	0.333333	0	0	0	15.3333	0	0.666667	1.33333	4.33333	0	0	p__Ascomycota	g__Fusicolla	Saprotroph	Undefined Saprotroph
OTU1715	0	0	0	0.333333	0	0	0	0	0	0	0	0	0	21.6667	p__Ascomycota	g__unclassified_f__Chaetomiaceae	Pathotroph-Saprotroph-Symbiotroph	Animal Pathogen-Dung Saprotroph-Endophyte-Epiphyte-Plant Saprotroph-Wood Saprotroph
OTU319	0	0	0	7	0	0	12.6667	1	0	0	0	1.33333	0	0	p__Ascomycota	g__unclassified_f__Nectriaceae	Saprotroph	Undefined Saprotroph
OTU1713	0	1	18	0	0	0	0	0	0	0	0	0	0	3	p__Ascomycota	g__Tetracladium	Saprotroph	Undefined Saprotroph
OTU953	0	0	0	3	0	15.3333	0	1	0.666667	0	0	2	0	0	p__Ascomycota	g__Humicola	Saprotroph	Undefined Saprotroph-Wood Saprotroph
OTU1978	0	0	3.33333	0	0	0.666667	10.3333	0	0	0	3.33333	1.66667	2.66667	0	p__unclassified_k__Fungi	g__unclassified_k__Fungi	-	-
OTU1806	0	0	0	0.666667	1	0	0	0	19.3333	0	1	0	0	0	p__unclassified_k__Fungi	g__unclassified_k__Fungi	-	-
OTU1467	0	1	0	2.66667	1	3.66667	0	1.66667	0	2.66667	0.333333	6.33333	2.33333	0	p__Ascomycota	g__Metarhizium	Pathotroph	Animal Pathogen
OTU1846	1	5	0.333333	4.66667	1.33333	0.666667	0	0	0	0	0.666667	5.33333	0	2.66667	p__Ascomycota	g__unclassified_o__Sordariales	-	-
OTU683	6.66667	0	0.333333	0.666667	0.333333	4.33333	0	0	0	4.66667	2.33333	0	0	2.33333	p__Ascomycota	g__unclassified_p__Ascomycota	-	-
OTU1296	0.666667	0.333333	0.333333	0	0.333333	0	0	0	0.333333	15.6667	0	0	0.333333	3.33333	p__Ascomycota	g__Myrothecium	Saprotroph	Undefined Saprotroph
OTU617	0	1.66667	0	0	0.333333	14	0	0	2.33333	0	0	2.66667	0	0	p__unclassified_k__Fungi	g__unclassified_k__Fungi	-	-
OTU497	0	0	0	1	0	14.6667	0	0.666667	0.666667	0	2	0.666667	0	1	p__Ascomycota	g__unclassified_o__Onygenales	-	-
OTU980	0	0	0	0	0	0	0	20.6667	0	0	0	0	0	0	p__unclassified_k__Fungi	g__unclassified_k__Fungi	-	-
OTU1504	0	0	0	0.666667	0	18	0	0	0	0	0	2	0	0	p__unclassified_k__Fungi	g__unclassified_k__Fungi	-	-
OTU1061	0	0	0	0.333333	0.333333	0	0	3.66667	14	0	0	1.33333	1	0	p__Ascomycota	g__Fusarium	Pathotroph-Saprotroph-Symbiotroph	Animal Pathogen-Endophyte-Lichen Parasite-Plant Pathogen-Soil Saprotroph-Wood Saprotroph
OTU793	0	0	1.33333	0.333333	0.333333	3.33333	4.66667	0	5.33333	1.66667	0	1.66667	1	1	p__Ascomycota	g__unclassified_o__Pleosporales	-	-
OTU489	0	0	0	0	0	20.3333	0	0	0	0	0.333333	0	0	0	p__Ascomycota	g__unclassified_o__Hypocreales	Saprotroph	Undefined Saprotroph
OTU1805	0	0	0	0	0	0	0	20.3333	0	0	0	0.333333	0	0	p__Ascomycota	g__unclassified_o__Onygenales	-	-
OTU775	0	6	0	0	0	2.33333	8.33333	0	0.666667	0	0	2	1	0	p__Ascomycota	g__Gymnoascus	Saprotroph	Undefined Saprotroph
OTU515	0.333333	0	0	4.33333	0	14.3333	0	0	0	1.33333	0	0	0	0	p__unclassified_k__Fungi	g__unclassified_k__Fungi	-	-
OTU1850	0	0	0	3.66667	0	0	0	0	1.66667	14.6667	0	0	0	0	p__Basidiomycota	g__Rhodotorula	Pathotroph-Saprotroph	Animal Endosymbiont-Animal Pathogen-Endophyte-Plant Pathogen-Undefined Saprotroph
OTU139	2.66667	0	2	2.66667	0	5.66667	0	0.333333	0	2.66667	4	0	0	0	p__unclassified_k__Fungi	g__unclassified_k__Fungi	-	-
OTU149	0	0	20	0	0	0	0	0	0	0	0	0	0	0	p__unclassified_k__Fungi	g__unclassified_k__Fungi	-	-
OTU717	2	1.66667	0.333333	5.33333	2.66667	0	3	0	1.33333	0	0.666667	2	0	1	p__Ascomycota	g__unclassified_p__Ascomycota	-	-
OTU1673	0	0	0	0.666667	0.333333	0.333333	0	0	0.666667	0	0	0.666667	0	17.3333	p__Basidiomycota	g__unclassified_f__Agaricaceae	Saprotroph	Undefined Saprotroph
OTU1115	0	0	0	0	0.666667	0	0	2	0	5.33333	0	0	11.6667	0	p__Ascomycota	g__Stagonosporopsis	Pathotroph	Plant Pathogen
OTU974	0	0	0	0.333333	0.333333	0	0	18.6667	0	0	0	0	0	0	p__Ascomycota	g__unclassified_f__Apiosporaceae	Saprotroph	Plant Saprotroph
OTU1511	0	0	0	0	0	0	0	5.66667	8	0	0	5.66667	0	0	p__Ascomycota	g__Phialemonium	Saprotroph	Undefined Saprotroph
OTU1323	5.66667	0	0.666667	0	1.66667	6	0	0.333333	0.333333	0	3.33333	1.33333	0	0	p__unclassified_k__Fungi	g__unclassified_k__Fungi	-	-
OTU1494	0	0.333333	4	0.666667	0	0	0	0.333333	3	0	0	0.666667	6.33333	4	p__unclassified_k__Fungi	g__unclassified_k__Fungi	-	-
OTU1160	0	0	0	0	0	0	0	0	0	19.3333	0	0	0	0	p__Ascomycota	g__Paraconiothyrium	Saprotroph	Undefined Saprotroph
OTU1253	0	1	0	1.33333	0	0	0.666667	0	0	16.3333	0	0	0	0	p__Ascomycota	g__Setophaeosphaeria	Pathotroph-Saprotroph	Fungal Parasite-Plant Pathogen-Plant Saprotroph
OTU1766	0	4	0.666667	0	0.333333	0	0	0	0	0.666667	1.33333	0.666667	0.666667	10.6667	p__unclassified_k__Fungi	g__unclassified_k__Fungi	-	-
OTU1028	0	3.66667	1	0.666667	1	0.666667	0.666667	1	3	0	4.66667	1.33333	0.666667	0.666667	p__Ascomycota	g__unclassified_c__Sordariomycetes	-	-
OTU1020	0	0	0	0	0	0	0	0	19	0	0	0	0	0	p__Zygomycota	g__Mortierella	Saprotroph-Symbiotroph	Endophyte-Litter Saprotroph-Soil Saprotroph-Undefined Saprotroph
OTU759	9	0.333333	3	1	0	0	0	0	2.33333	2.33333	0	0.333333	0	0.666667	p__Basidiomycota	g__unclassified_f__Agaricaceae	Saprotroph	Undefined Saprotroph
OTU1677	0	0	0	0	6.33333	0	0	0.333333	0	0	0.666667	4.33333	0	7.33333	p__Ascomycota	g__unclassified_c__Sordariomycetes	-	-
OTU802	0	0	0	0	0	0	18.6667	0	0	0	0	0	0	0	p__Ascomycota	g__unclassified_o__Hypocreales	Saprotroph	Undefined Saprotroph
OTU561	0	0	0	0	0	18.6667	0	0	0	0	0	0	0	0	p__Basidiomycota	g__unclassified_o__Sebacinales	-	-
OTU891	2.66667	0	0	4	1.66667	0	0	7.66667	0.666667	0	0	1.66667	0	0.333333	p__Ascomycota	g__unclassified_p__Ascomycota	-	-
OTU1589	0	0.333333	0	0.333333	0	1.66667	0	0	0	0	0	0.666667	8.66667	7	p__unclassified_k__Fungi	g__unclassified_k__Fungi	-	-
OTU1540	0	1.33333	0.666667	0.333333	1.66667	0	0	3.66667	0	0	0	11	0	0	p__Ascomycota	g__unclassified_f__Herpotrichiellaceae	Pathotroph-Saprotroph	Animal Pathogen-Fungal Parasite-Undefined Saprotroph
OTU1335	2.66667	1	0	2	0	0	0	0.666667	8	0	0.333333	0.666667	0	3.33333	p__Ascomycota	g__unclassified_p__Ascomycota	-	-
OTU939	0	0.333333	0	0.333333	0	0	0	10.3333	0	0	0	7.66667	0	0	p__unclassified_k__Fungi	g__unclassified_k__Fungi	-	-
OTU1167	0	0	0	0	0	0	0	0	0	6.33333	0	0	0	12	p__Ascomycota	g__Triangularia	Saprotroph	Undefined Saprotroph
OTU1178	0.333333	0	0	0.666667	0	0	0	0	0	16	1.33333	0	0	0	p__Ascomycota	g__unclassified_p__Ascomycota	-	-
OTU203	0	1.33333	0	4	0	0	0	0	13	0	0	0	0	0	p__Basidiomycota	g__unclassified_o__Polyporales	-	-
OTU269	0	0.666667	4.33333	12.3333	0	0	0	1	0	0	0	0	0	0	p__Ascomycota	g__Acremonium	Pathogen-Saprotroph-Symbiotroph	Animal Pathogen-Endophyte-Fungal Parasite-Plant Pathogen-Wood Saprotroph
OTU1824	1.66667	1	1.66667	2.66667	0	0.666667	0	0	0.333333	0	10	0	0	0	p__Ascomycota	g__unclassified_f__Sporormiaceae	Saprotroph	Dung Saprotroph-Plant Saprotroph
OTU2017	7.66667	0	0	0	0	0	0	0.666667	0	0	9.66667	0	0	0	p__unclassified_k__Fungi	g__unclassified_k__Fungi	-	-
OTU58	0	9.33333	1	0.666667	0	3.66667	0	0	0	0	3.33333	0	0	0	p__Ascomycota	g__unclassified_o__Microascales	-	-
OTU126	0	16.3333	0	0	0	1	0	0	0	0	0	0.333333	0	0.333333	p__unclassified_k__Fungi	g__unclassified_k__Fungi	-	-
OTU89	0	9.66667	1.66667	0	0	0	0	0.666667	1.33333	0	0	0	0.666667	3.66667	p__Ascomycota	g__unclassified_o__Pleosporales	-	-
OTU632	5.66667	2.66667	0	0.666667	0.333333	5	0	0	0	0	0	0	3.33333	0	p__unclassified_k__Fungi	g__unclassified_k__Fungi	-	-
OTU1411	0	0	0	0	0.666667	0.333333	0	0	0	0.666667	14	0	1	1	p__Ascomycota	g__Penicillium	Saprotroph	Undefined Saprotroph
OTU1177	0.333333	1.33333	0.666667	5	1	3	0	0	0.333333	2.66667	0.666667	1.33333	0.333333	1	p__Ascomycota	g__unclassified_o__Onygenales	-	-
OTU1909	2	1	0.666667	0.666667	3	0.666667	0	0	4.66667	0	1	1.33333	1.33333	1.33333	p__Ascomycota	g__unclassified_f__Nectriaceae	Saprotroph	Undefined Saprotroph
OTU1593	0	6.33333	0	0	0	0	0.333333	0	0	0	0	0.666667	10.3333	0	p__Ascomycota	g__unclassified_c__Sordariomycetes	-	-
OTU250	0	0	0	15.6667	1.66667	0	0	0	0	0	0	0	0	0	p__Ascomycota	g__Pyrenochaetopsis	Pathotroph-Saprotroph-Symbiotroph	Endophyte-Lichen Parasite-Undefined Saprotroph
OTU1823	4.66667	0	0.333333	0	0.333333	0	0	0	0	0	0.333333	0	11.6667	0	p__Ascomycota	g__Eucasphaeria	Saprotroph	Undefined Saprotroph
OTU756	0.666667	0.333333	1	0.666667	0	0.333333	0	0	4	0	6.66667	0.666667	0.666667	2.33333	p__Ascomycota	g__unclassified_p__Ascomycota	-	-
OTU1891	0	0	0	7	0	0.333333	0	5.33333	2	0	0	2.66667	0	0	p__Ascomycota	g__Acremonium	Pathogen-Saprotroph-Symbiotroph	Animal Pathogen-Endophyte-Fungal Parasite-Plant Pathogen-Wood Saprotroph
OTU701	6.66667	0	5.33333	0	0	0	0	0	1	2.66667	0.333333	0	0	1	p__Ascomycota	g__unclassified_p__Ascomycota	-	-
OTU741	4	2	0	6.66667	1.33333	0	0	3	0	0	0	0	0	0	p__Zygomycota	g__Mortierella	Saprotroph-Symbiotroph	Endophyte-Litter Saprotroph-Soil Saprotroph-Undefined Saprotroph
OTU934	0	2.33333	0	7	0	0	0	7.33333	0	0	0	0	0	0	p__Ascomycota	g__unclassified_p__Ascomycota	-	-
OTU1567	1	1	0	1	0.333333	11.6667	0	0	0	0	0	0	1.33333	0	p__Ascomycota	g__unclassified_p__Ascomycota	-	-
OTU1600	0	0	0	1.33333	0	0	0	4.33333	0.333333	2.66667	0	2	5.66667	0	p__Ascomycota	g__unclassified_o__Pleosporales	-	-
OTU1787	0	0	0	0	0	9.33333	0	0	0	0	0	0	0	7	p__unclassified_k__Fungi	g__unclassified_k__Fungi	-	-
OTU550	0	0	0	3	0	13.3333	0	0	0	0	0	0	0	0	p__Ascomycota	g__unclassified_o__Hypocreales	Saprotroph	Undefined Saprotroph
OTU795	0	0	0	0	0	0	16.3333	0	0	0	0	0	0	0	p__Ascomycota	g__Coniochaeta	Pathotroph-Saprotroph-Symbiotroph	Animal Pathogen-Dung Saprotroph-Endophyte-Lichen Parasite-Plant Pathogen-Undefined Saprotroph
OTU1101	0.333333	1	1.66667	0	0	0	0	0.666667	9.66667	0	0	0	0	2.66667	p__Ascomycota	g__unclassified_p__Ascomycota	-	-
OTU1870	4.33333	0.666667	1	0.333333	1	0	4	0	1.33333	0.333333	2	1	0	0	p__Ascomycota	g__unclassified_f__norank_o__Hypocreales	Saprotroph	Undefined Saprotroph
OTU136	0	2.33333	5.33333	4.33333	0	3.33333	0	0	0	0	0	0.666667	0	0	p__Ascomycota	g__unclassified_p__Ascomycota	-	-
OTU949	1.33333	0.333333	2.66667	0.666667	10.3333	0	0	0.666667	0	0	0	0	0	0	p__unclassified_k__Fungi	g__unclassified_k__Fungi	-	-
OTU968	0	0	0	0	0	0	0	15.6667	0	0	0	0	0	0	p__Chytridiomycota	g__Rhizophlyctis	Saprotroph	Undefined Saprotroph
OTU151	0	0	8.66667	0	0	6.66667	0	0	0	0	0.333333	0	0	0	p__Ascomycota	g__unclassified_p__Ascomycota	-	-
OTU677	0.333333	10	0	1	0.666667	0.666667	0	0	1.33333	0	0	0.333333	0.333333	1	p__Ascomycota	g__Bradymyces	-	-
OTU987	3	0	0	0.333333	0.666667	0	0	3.33333	0.333333	0	2	6	0	0	p__unclassified_k__Fungi	g__unclassified_k__Fungi	-	-
OTU1218	0	0	0	0	0	0	0	0	0	8	5.33333	2.33333	0	0	p__Basidiomycota	g__Eocronartium	Pathotroph	Plant Pathogen
OTU841	0	0	0	0	0	0	13.3333	0	1.66667	0	0	0.666667	0	0	p__Ascomycota	g__Lasiodiplodia	Pathotroph	Plant Pathogen
OTU273	0	0	0	11.6667	3.66667	0	0	0	0	0	0	0	0	0	p__Ascomycota	g__unclassified_f__norank_o__Pleosporales	-	-
OTU822	0	0.666667	0.333333	0	0	0	11.6667	0	0	1.33333	0.666667	0.666667	0	0	p__Basidiomycota	g__Sporobolomyces	Pathotroph-Saprotroph	Fungal Parasite-Litter Saprotroph
OTU876	0	0	0	1.66667	0	7.66667	0	4.66667	1	0	0	0	0.333333	0	p__Ascomycota	g__Scedosporium	Saprotroph	Undefined Saprotroph
OTU1393	7	0	1.66667	2.33333	0.333333	0	0	0.666667	0	1.66667	0.666667	0.333333	0	0.666667	p__unclassified_k__Fungi	g__unclassified_k__Fungi	-	-
OTU1740	0	1	0	0.666667	0	0.333333	0.666667	3.66667	3.33333	1.66667	0	3.33333	0	0.666667	p__Ascomycota	g__unclassified_f__Nectriaceae	Saprotroph	Undefined Saprotroph
OTU690	14	0	0	0	0	0	0.333333	0	1	0	0	0	0	0	p__Ascomycota	g__Coniochaeta	Pathotroph-Saprotroph-Symbiotroph	Animal Pathogen-Dung Saprotroph-Endophyte-Lichen Parasite-Plant Pathogen-Undefined Saprotroph
OTU1204	1	1.66667	1	3	0.666667	1	0.333333	1	1	2.33333	0.666667	0	0.333333	1.33333	p__Ascomycota	g__unclassified_o__Hypocreales	Saprotroph	Undefined Saprotroph
OTU851	0	0	0	0	0	0	15.3333	0	0	0	0	0	0	0	p__Ascomycota	g__Ilyonectria	Saprotroph	Undefined Saprotroph
OTU1572	0	0	0	0	0.666667	0	0	0	0.666667	0	0	0	13.6667	0	p__Ascomycota	g__unclassified_o__norank	-	-
OTU1171	0	0	0	0	0	0	0	0.333333	0	14.6667	0	0	0	0	p__Ascomycota	g__unclassified_o__Pleosporales	-	-
OTU1492	0	0	0	0	0	0	0.333333	0	0	0	0.666667	14	0	0	p__Ascomycota	g__unclassified_o__Hypocreales	Saprotroph	Undefined Saprotroph
OTU872	0.333333	0.666667	0	0.666667	0	0	0	1	0	9	0.333333	0	0	3	p__Ascomycota	g__Phoma	Pathotroph-Saprotroph-Symbiotroph	Endophyte-Dung Saprotroph-Lichen Parasite-Litter Saprotroph-Plant Pathogen-Soil Saprotroph-Wood Saprotroph
OTU681	3.66667	0	1	0	0	0	0	0	0	0	10.3333	0	0	0	p__Zygomycota	g__Ramicandelaber	Saprotroph	Undefined Saprotroph
OTU200	0	0	0	12	0	0	0	0	0	0.666667	2	0	0	0	p__Glomeromycota	g__unclassified_c__Glomeromycetes	Symbiotroph	Arbuscular Mycorrhizal
OTU862	0	0	0	0	0	0	0	9.33333	5	0	0	0.333333	0	0	p__Ascomycota	g__Microascus	Pathotroph-Saprotroph-Symbiotroph	Animal Pathogen-Endophyte-Plant Pathogen-Undefined Saprotroph
OTU985	0	1.66667	0.666667	2.33333	0	0.333333	6.33333	0.333333	0.666667	1	0	0.333333	0	1	p__Ascomycota	g__Cladosporium	Pathotroph-Saprotroph-Symbiotroph	Animal Pathogen-Endophyte-Lichen Parasite-Plant Pathogen-Wood Saprotroph
OTU63	0	12.3333	0	0	0	0	0.666667	0	0	0	0	0	1.66667	0	p__Ascomycota	g__Microascus	Pathotroph-Saprotroph-Symbiotroph	Animal Pathogen-Endophyte-Plant Pathogen-Undefined Saprotroph
OTU2012	0	0	0	0	0	14.3333	0.333333	0	0	0	0	0	0	0	p__Ascomycota	g__unclassified_c__Sordariomycetes	-	-
OTU67	2.66667	2.66667	0	0	0	0	0	1.33333	3.66667	0	0	0	0	4	p__Ascomycota	g__Idriella	Saprotroph	Undefined Saprotroph
OTU1644	1	2	1	1	0	4	0	2	0	0	0.333333	2	1	0	p__Basidiomycota	g__Ganoderma	Pathotroph-Saprotroph	Plant Pathogen-Wood Saprotroph
OTU682	13	0	0	0	0.333333	0	0	0	0	0	1	0	0	0	p__Ascomycota	g__unclassified_o__Coniochaetales	-	-
OTU1705	0.333333	0.666667	0.333333	1.33333	1.66667	1	0.666667	0.666667	0.333333	2	2	1	0	2.33333	p__Ascomycota	g__Gibberella	Pathotroph	Plant Pathogen
OTU828	0	0	0	0	0	0.333333	11.3333	0.666667	2	0	0	0	0	0	p__Basidiomycota	g__Lepista	Saprotroph	Undefined Saprotroph
OTU18	0	14.3333	0	0	0	0	0	0	0	0	0	0	0	0	p__unclassified_k__Fungi	g__unclassified_k__Fungi	-	-
OTU1640	0	0.666667	2	0	0	0.666667	0	0.333333	0	0	0	1.66667	8.66667	0	p__unclassified_k__Fungi	g__unclassified_k__Fungi	-	-
OTU108	0	14	0	0	0	0	0	0	0	0	0	0	0	0	p__Ascomycota	g__Kernia	Saprotroph	Dung Saprotroph-Undefined Saprotroph
OTU774	0	0.333333	0	0.666667	0	0	13	0	0	0	0	0	0	0	p__Ascomycota	g__Auxarthron	Saprotroph	Dung Saprotroph-Soil Saprotroph
OTU873	0	0	0	0	1	0	0	6	1.33333	5.66667	0	0	0	0	p__Ascomycota	g__Lectera	Pathotroph	Plant Pathogen
OTU1394	0	2.66667	1	0	1	0.333333	0	3	1.33333	0.333333	0.333333	2	0	2	p__unclassified_k__Fungi	g__unclassified_k__Fungi	-	-
OTU1001	0	0	0	1.33333	0	0	0	0.666667	12	0	0	0	0	0	p__Ascomycota	g__unclassified_o__Hypocreales	Saprotroph	Undefined Saprotroph
OTU1795	2	8.33333	0	2	0	0	0	1.33333	0	0	0	0.333333	0	0	p__Ascomycota	g__Scedosporium	Saprotroph	Undefined Saprotroph
OTU1653	0	0	0	0.333333	0	0	12.6667	0	0	0	0	0	0.666667	0	p__Ascomycota	g__unclassified_o__Helotiales	-	-
OTU1707	0	0	0	0	0	0	0	0	0	0	10	0	0	3.66667	p__Basidiomycota	g__unclassified_o__Agaricales	-	-
OTU275	0	0	1	4.66667	1	0	0	0	0	0	2	4.33333	0	0.666667	p__unclassified_k__Fungi	g__unclassified_k__Fungi	-	-
OTU156	0	0.666667	6.33333	1.66667	0.333333	0.333333	0	0.333333	0	0	0.333333	0.666667	0	3	p__Ascomycota	g__unclassified_c__Sordariomycetes	-	-
OTU621	0.333333	0	0	0	0	8	0	0	0	1	3	0	0	1.33333	p__Ascomycota	g__unclassified_p__Ascomycota	-	-
OTU13	0	11.3333	1	0	0.666667	0	0	0.333333	0	0	0.333333	0	0	0	p__unclassified_k__Fungi	g__unclassified_k__Fungi	-	-
OTU1937	0	1	0	0.333333	0	0.333333	0	0.333333	0	0	0	0.333333	0.333333	10.6667	p__unclassified_k__Fungi	g__unclassified_k__Fungi	-	-
OTU1221	0	0	0	0.333333	0	0	0	2.33333	0	10.6667	0	0	0	0	p__Basidiomycota	g__Peniophora	Pathotroph-Saprotroph	Plant Pathogen-Wood Saprotroph
OTU1801	0	0.666667	0	0	0	9.66667	0	0	0	2	0	0	0.666667	0.333333	p__Ascomycota	g__unclassified_f__norank	-	-
OTU1762	0.333333	0.333333	0	0	1	0	0	1.66667	2	1.66667	0	0	0	6.33333	p__Basidiomycota	g__Cryptococcus	Pathotroph-Saprotroph-Symbiotroph	Fungal Parasite-Undefined Saprotroph
OTU298	1.66667	0	0.666667	1.66667	0	0	0	0.333333	3.33333	0	3	1.33333	0	1.33333	p__Ascomycota	g__unclassified_o__Sordariales	-	-
OTU21	0	6	0	1.33333	0	0	0	0	0	0	1	2	0	3	p__unclassified_k__Fungi	g__unclassified_k__Fungi	-	-
OTU1153	0	0	0	0	0	0	0	0	0	12.3333	0	1	0	0	p__Ascomycota	g__Lophiostoma	Saprotroph	Undefined Saprotroph
OTU1224	0	0	0	0	0	0	0	0.333333	0	12.6667	0	0	0	0	p__Ascomycota	g__Phialemoniopsis	-	-
OTU399	0	0.333333	0	0	4.33333	0	0	6.66667	0	0	0	0	1.66667	0	p__Ascomycota	g__Beauveria	Pathotroph	Animal Pathogen
OTU584	0	0	0	1.66667	0	11	0	0.333333	0	0	0	0	0	0	p__Ascomycota	g__Septoria	Pathotroph	Plant Pathogen
OTU32	0	7	0.666667	0	0	0	0	0	0.666667	0	2.33333	0.666667	0	1.66667	p__unclassified_k__Fungi	g__unclassified_k__Fungi	-	-
OTU1213	0	0	0	0	0	0	0	0	0	13	0	0	0	0	p__Ascomycota	g__Asteromella	Pathotroph	Plant Pathogen
OTU707	4.33333	0	0	0	0	0	0	3	1	4.66667	0	0	0	0	p__Ascomycota	g__unclassified_o__Coniochaetales	-	-
OTU339	0	2	2.33333	0.666667	0	0	0	6.33333	0	0	0	0	1.66667	0	p__Ascomycota	g__Humicola	Saprotroph	Undefined Saprotroph-Wood Saprotroph
OTU575	0	0	0	0	0	9	0	0.666667	0	0	2	1.33333	0	0	p__unclassified_k__Fungi	g__unclassified_k__Fungi	-	-
OTU1779	1.66667	0	1	1	2	0.666667	0	0.333333	2.33333	0	0.333333	1.33333	1	1.33333	p__Ascomycota	g__Fusarium	Pathotroph-Saprotroph-Symbiotroph	Animal Pathogen-Endophyte-Lichen Parasite-Plant Pathogen-Soil Saprotroph-Wood Saprotroph
OTU129	0	11.3333	0	0	0	0	0	0	0	0	0	1.66667	0	0	p__Ascomycota	g__unclassified_c__Sordariomycetes	-	-
OTU1227	0	0	0	0.666667	0	0	0	0	0	12.3333	0	0	0	0	p__Ascomycota	g__Leptosphaeria	Pathotroph	Plant Pathogen
OTU50	0	3	0	0	0	0	2	0	0	1.66667	0	0.666667	2.33333	3	p__Basidiomycota	g__Erythrobasidium	Saprotroph	Undefined Saprotroph
OTU1412	0	0	0	0	0	0	5.33333	0	0	0	0.666667	6.66667	0	0	p__unclassified_k__Fungi	g__unclassified_k__Fungi	-	-
OTU1538	0	5.66667	0	0.333333	0	0	0.333333	0.333333	0.333333	0	0.333333	2.33333	0	3	p__Ascomycota	g__unclassified_o__Pleosporales	-	-
OTU1429	2	0.333333	0	0.333333	0	0	0	0.333333	2	0	4	2.33333	0.333333	1	p__unclassified_k__Fungi	g__unclassified_k__Fungi	-	-
OTU1920	1	0.333333	0	0.333333	0.333333	0	6.33333	0	0	0	0	0	3	1.33333	p__Ascomycota	g__Candida	Saprotroph	Undefined Saprotroph
OTU1613	0	0	0.666667	0.666667	0	4.66667	0	0	0	0.333333	0.333333	0.666667	3.33333	1.66667	p__unclassified_k__Fungi	g__unclassified_k__Fungi	-	-
OTU1772	0	5	0	0	0	0	0	0	0	0	0	0.333333	0	7	p__Basidiomycota	g__Agaricus	Saprotroph	Undefined Saprotroph
OTU589	0	0	0	4	0	8	0	0	0	0	0	0	0	0.333333	p__Ascomycota	g__unclassified_f__Onygenaceae	Saprotroph	Dung Saprotroph-Soil Saprotroph
OTU727	1.33333	0.666667	0	0.333333	0	0	0	0	1.33333	0	4.33333	2.66667	0	1.66667	p__unclassified_k__Fungi	g__unclassified_k__Fungi	-	-
OTU1983	0	12.3333	0	0	0	0	0	0	0	0	0	0	0	0	p__unclassified_k__Fungi	g__unclassified_k__Fungi	-	-
OTU26	0	5.66667	1.66667	1.66667	0	0.333333	1.66667	0	1	0	0	0	0	0	p__unclassified_k__Fungi	g__unclassified_k__Fungi	-	-
OTU116	0.333333	6.66667	0	3.66667	0	0	0	0.333333	0	0.333333	0	0.666667	0	0	p__unclassified_k__Fungi	g__unclassified_k__Fungi	-	-
OTU459	0	0	0	7	0	0.666667	0	0	0	0.666667	0	1	0	2.66667	p__Basidiomycota	g__Mrakiella	-	-
OTU1737	0	0.666667	0	0	0.666667	2.66667	0	0	0	0	0	0	0	8	p__unclassified_k__Fungi	g__unclassified_k__Fungi	-	-
OTU1381	2.33333	0	0	0	0	1.66667	0	1	0.666667	0.333333	4	0.333333	1.66667	0	p__Ascomycota	g__unclassified_p__Ascomycota	-	-
OTU1549	0	2.66667	0	0	0	0	0	0	0	0	0	0	9.33333	0	p__Ascomycota	g__Selinia	Saprotroph	Dung Saprotroph-Undefined Saprotroph
OTU1426	2	0	0	2.33333	0	0	0	1	0	0	6.66667	0	0	0	p__Ascomycota	g__unclassified_p__Ascomycota	-	-
OTU256	0	0	0	12	0	0	0	0	0	0	0	0	0	0	p__Ascomycota	g__unclassified_o__Sordariales	-	-
OTU1508	0	0.333333	0	0.333333	1.66667	0	0	0.666667	0.666667	1.33333	0.666667	6.33333	0	0	p__unclassified_k__Fungi	g__unclassified_k__Fungi	-	-
OTU1930	1	0	0	0	0	0	0.333333	0	1.33333	0	0.333333	1.33333	2	5.66667	p__Ascomycota	g__unclassified_p__Ascomycota	-	-
OTU1976	1.33333	0.333333	0	1	0	3	0	2.33333	1.66667	0	0.333333	1.33333	0	0.666667	p__Ascomycota	g__Chaetomium	Pathotroph-Saprotroph-Symbiotroph	Animal Pathogen-Dung Saprotroph-Endophyte-Epiphyte-Plant Saprotroph-Wood Saprotroph
OTU162	10.3333	0	1	0.666667	0	0	0	0	0	0	0	0	0	0	p__Ascomycota	g__unclassified_p__Ascomycota	-	-
OTU1580	0	0	0	0.333333	0	0	0	1.33333	0	0	0	0	10.3333	0	p__unclassified_k__Fungi	g__unclassified_k__Fungi	-	-
OTU1751	0	0	0	0	0	0	0	0	0	0	0	0	0	11.6667	p__unclassified_k__Fungi	g__unclassified_k__Fungi	-	-
OTU1396	0	0	0	0	0	8	0	0	0	0	3.66667	0	0	0	p__Ascomycota	g__unclassified_f__Nectriaceae	Saprotroph	Undefined Saprotroph
OTU1625	0	0	0.666667	0	0	0	0	0	0	0	0	0	11	0	p__Ascomycota	g__Sagenomella	Saprotroph	Undefined Saprotroph
OTU501	0	0	0.333333	0	0	8	0	0	0.333333	0	0	0	3	0	p__Ascomycota	g__unclassified_f__Ajellomycetaceae	Pathotroph-Saprotroph	Animal Pathogen-Undefined Saprotroph
OTU679	1.33333	0	0	1.33333	0.333333	0	0	0	1.66667	0.333333	2	1.66667	1.33333	1.66667	p__Ascomycota	g__Fusarium	Pathotroph-Saprotroph-Symbiotroph	Animal Pathogen-Endophyte-Lichen Parasite-Plant Pathogen-Soil Saprotroph-Wood Saprotroph
OTU1463	0.333333	1.33333	0	0	0	0	8	0	0.666667	0	0	0.333333	0	1	p__unclassified_k__Fungi	g__unclassified_k__Fungi	-	-
OTU1964	0	0.666667	1.33333	1	0.666667	0.666667	0	0.666667	1.33333	0	0	0	5	0.333333	p__Ascomycota	g__unclassified_p__Ascomycota	-	-
OTU1313	0	0	0	1	0	0	0	0	0.333333	10.3333	0	0	0	0	p__Ascomycota	g__Cyphellophora	Pathotroph-Symbiotroph	Epiphyte-Plant Pathogen
OTU623	0	0	0	0	0	11	0	0	0	0	0	0	0.333333	0	p__Ascomycota	g__Ascorhizoctonia	Saprotroph	Undefined Saprotroph
OTU668	1.33333	2	0.333333	1.66667	0	1	0	0	1	0	0	0.666667	3	0.333333	p__Zygomycota	g__Ramicandelaber	Saprotroph	Undefined Saprotroph
OTU363	0	0	0	6	0.333333	0	0	0.666667	0	0	0	4.33333	0	0	p__Ascomycota	g__Preussia	Saprotroph	Dung Saprotroph-Plant Saprotroph
OTU15	3	2.33333	0	1.33333	0	0	0	2.33333	1.66667	0.666667	0	0	0	0	p__Basidiomycota	g__Cryptococcus	Pathotroph-Saprotroph-Symbiotroph	Fungal Parasite-Undefined Saprotroph
OTU1860	0	0	0	0.666667	1	0	0	4.33333	0	0	0	0	5.33333	0	p__Ascomycota	g__unclassified_c__Sordariomycetes	-	-
OTU628	0	0	0	0	0	11.3333	0	0	0	0	0	0	0	0	p__Ascomycota	g__Penicillium	Saprotroph	Undefined Saprotroph
OTU1969	2.66667	0	3.66667	0	2	2.33333	0	0	0	0	0	0.333333	0	0	p__Ascomycota	g__Fusarium	Pathotroph-Saprotroph-Symbiotroph	Animal Pathogen-Endophyte-Lichen Parasite-Plant Pathogen-Soil Saprotroph-Wood Saprotroph
OTU49	1.66667	2.33333	1.66667	0.666667	0	0.666667	0	0	0.333333	1	0.666667	1.33333	0	0.666667	p__unclassified_k__Fungi	g__unclassified_k__Fungi	-	-
OTU1223	0	0	0	0	0	0	0	0	0	10	0	1	0	0	p__Ascomycota	g__Articulospora	Saprotroph	Undefined Saprotroph
OTU1369	0	0	0	0	0	0	0	0	0	4.33333	6.66667	0	0	0	p__Ascomycota	g__Scytalidium	Saprotroph	Wood Saprotroph
OTU29	0	10	1	0	0	0	0	0	0	0	0	0	0	0	p__Ascomycota	g__unclassified_o__Helotiales	-	-
OTU1298	0.333333	0	0.666667	0.333333	0	4.66667	1.33333	0	0.333333	2	0.333333	0	0	1	p__Basidiomycota	g__Coprinellus	Saprotroph	Dung Saprotroph-Plant Saprotroph-Wood Saprotroph
OTU138	0.333333	0.333333	1	0.333333	0	0	0	4.33333	1.66667	0	0	0	3	0	p__Ascomycota	g__unclassified_f__Nectriaceae	Saprotroph	Undefined Saprotroph
OTU1946	0.333333	2.33333	0.666667	0	0.333333	2	0	0	0.333333	0	0.333333	1	1	2.66667	p__unclassified_k__Fungi	g__unclassified_k__Fungi	-	-
OTU508	0.333333	1.66667	1	0.666667	0	5.33333	0	0	0.666667	0	0	0	1.33333	0	p__Zygomycota	g__Ramicandelaber	Saprotroph	Undefined Saprotroph
OTU998	0	0	0	0.333333	0.333333	0	0	4.33333	4	1	0.666667	0.333333	0	0	p__unclassified_k__Fungi	g__unclassified_k__Fungi	-	-
OTU1532	1.33333	0	0.333333	1	0	0	0	1	0	0	3.33333	2	0	2	p__Ascomycota	g__Thielavia	Saprotroph	Dung Saprotroph-Undefined Saprotroph
OTU429	0	1.33333	0.333333	3	0.333333	0.666667	0	0	0	0	1.33333	0.666667	2.33333	1	p__unclassified_k__Fungi	g__unclassified_k__Fungi	-	-
OTU1902	0	0.333333	0	0	0	0.333333	0	10.3333	0	0	0	0	0	0	p__Ascomycota	g__unclassified_c__Eurotiomycetes	-	-
OTU142	0	0	10.6667	0	0	0	0	0	0	0	0	0	0	0	p__Ascomycota	g__unclassified_o__Hypocreales	Saprotroph	Undefined Saprotroph
OTU838	0	0	0	0	0	0	10.6667	0	0	0	0	0	0	0	p__Basidiomycota	g__Rhodotorula	Pathotroph-Saprotroph	Animal Endosymbiont-Animal Pathogen-Endophyte-Plant Pathogen-Undefined Saprotroph
OTU836	0	0	0	0	0	0	10.6667	0	0	0	0	0	0	0	p__unclassified_k__Fungi	g__unclassified_k__Fungi	-	-
OTU110	0	0.666667	0	0.333333	0	0	0	2.66667	1	0	0	0.333333	0	5.66667	p__Chytridiomycota	g__Powellomyces	Pathotroph	Plant Pathogen
OTU330	0	0	1.66667	1.33333	1.66667	0	0	6	0	0	0	0	0	0	p__Ascomycota	g__Sarocladium	Saprotroph	Undefined Saprotroph
OTU1130	0	0	0	0	0	0	0	0	0.666667	10	0	0	0	0	p__Basidiomycota	g__Dioszegia	Pathotroph-Saprotroph-Symbiotroph	Fungal Parasite-Undefined Saprotroph
OTU1143	0	0	0	1.33333	0	0	0	3.66667	0.666667	3	0	2	0	0	p__Ascomycota	g__Peroneutypa	Pathotroph	Plant Pathogen
OTU1897	0.666667	2	0	0	1	0	0	0	3	0	0	1.66667	2.33333	0	p__Ascomycota	g__Cephalotheca	Saprotroph	Undefined Saprotroph
OTU1781	0.666667	4	0	0.666667	0	0.666667	1	0.333333	0	0.333333	0.333333	0	0.666667	1.66667	p__unclassified_k__Fungi	g__unclassified_k__Fungi	-	-
OTU210	0	0	0	3.33333	0.333333	0	0	4	0	0	0	2.66667	0	0	p__Ascomycota	g__unclassified_p__Ascomycota	-	-
OTU1632	0	0.666667	0	0	0	0	0	0.333333	0	0	0	0	9.33333	0	p__Ascomycota	g__Microdochium	Pathotroph-Symbiotroph	Endophyte-Plant Pathogen
OTU1385	0	0	0	0	0	0	0	0	0	0	6.33333	4	0	0	p__Basidiomycota	g__unclassified_c__Agaricomycetes	-	-
OTU1442	0	0	0	0	0	0.333333	0	0	0	0	0.333333	9.33333	0.333333	0	p__unclassified_k__Fungi	g__unclassified_k__Fungi	-	-
OTU641	1	0.666667	3.33333	1	0	3.33333	0	0	0.666667	0.333333	0	0	0	0	p__Ascomycota	g__Aspergillus	Saprotroph	Undefined Saprotroph
OTU1835	0.333333	1.33333	0	0.333333	0	0	0	1.33333	0	0	0	2.66667	1.33333	3	p__unclassified_k__Fungi	g__unclassified_k__Fungi	-	-
OTU635	0	0	0	0	0	10.3333	0	0	0	0	0	0	0	0	p__Ascomycota	g__unclassified_f__Pezizaceae	Saprotroph-Symbiotroph	Dung Saprotroph-Ectomycorrhizal-Litter Saprotroph-Undefined Saprotroph
OTU786	0	0	0	0	0	0	10.3333	0	0	0	0	0	0	0	p__Ascomycota	g__unclassified_c__Sordariomycetes	-	-
OTU1052	0	0	0	0	0	0	0	0	5.66667	0	0	1.66667	0	2.66667	p__Ascomycota	g__Madurella	Pathotroph	Animal Pathogen
OTU1856	0	0.333333	0	0	0	0	8.66667	1	0	0	0	0	0	0	p__Ascomycota	g__Talaromyces	Saprotroph	Undefined Saprotroph
OTU326	0	0	0.333333	8.66667	0	0	0	0	0	1	0	0	0	0	p__unclassified_k__Fungi	g__unclassified_k__Fungi	-	-
OTU963	0	0	0	0	0	0	0	10	0	0	0	0	0	0	p__Basidiomycota	g__Hannaella	Pathotroph-Saprotroph-Symbiotroph	Fungal Parasite-Undefined Saprotroph
OTU590	0	0	0	0	0	10	0	0	0	0	0	0	0	0	p__unclassified_k__Fungi	g__unclassified_k__Fungi	-	-
OTU1555	0	0	0	0	0	0	0	0	0	0	0	0	10	0	p__Ascomycota	g__unclassified_c__Sordariomycetes	-	-
OTU1398	7.66667	0	0	0	0	0	0	0	0	0	2.33333	0	0	0	p__unclassified_k__Fungi	g__unclassified_k__Fungi	-	-
OTU790	0	0	0	0	0	0	10	0	0	0	0	0	0	0	p__Ascomycota	g__unclassified_p__Ascomycota	-	-
OTU610	0	0	0.666667	0	0	6	3.33333	0	0	0	0	0	0	0	p__Ascomycota	g__unclassified_f__Herpotrichiellaceae	Pathotroph-Saprotroph	Animal Pathogen-Fungal Parasite-Undefined Saprotroph
OTU713	1.33333	0	0	0.333333	0	0	0	0	3.33333	0	5	0	0	0	p__unclassified_k__Fungi	g__unclassified_k__Fungi	-	-
OTU1738	0	0	2.33333	0	0	0	1	0	1.33333	0	3.33333	0	0	2	p__Ascomycota	g__Aspergillus	Saprotroph	Undefined Saprotroph
OTU166	0	0	5.66667	1.66667	0	0.333333	0	0	0	1.66667	0.333333	0	0	0	p__Ascomycota	g__Trichoderma	Saprotroph	Undefined Saprotroph
OTU1627	1	0	0	0	0.333333	0	0	0.666667	0	0	0	1	6.66667	0	p__Ascomycota	g__Acremonium	Pathogen-Saprotroph-Symbiotroph	Animal Pathogen-Endophyte-Fungal Parasite-Plant Pathogen-Wood Saprotroph
OTU229	0	0	0	9.66667	0	0	0	0	0	0	0	0	0	0	p__Basidiomycota	g__Conocybe	Saprotroph	Undefined Saprotroph
OTU231	0	0	0	9.66667	0	0	0	0	0	0	0	0	0	0	p__Ascomycota	g__Metarhizium	Pathotroph	Animal Pathogen
OTU505	0	0	0	0	0	9.66667	0	0	0	0	0	0	0	0	p__Ascomycota	g__Podospora	Saprotroph-Symbiotroph	Dung Saprotroph-Endophyte-Litter Saprotroph-Undefined Saprotroph
OTU693	9.66667	0	0	0	0	0	0	0	0	0	0	0	0	0	p__Ascomycota	g__Oidiodendron	Pathotroph-Symbiotroph	Ericoid Mycorrhizal
OTU1711	0	0	0	0	0	0	8	0	0	0	0	0	0	1.66667	p__Ascomycota	g__unclassified_c__Sordariomycetes	-	-
OTU1121	0	0	0	0	0	0	0	0	0	9.66667	0	0	0	0	p__Ascomycota	g__unclassified_p__Ascomycota	-	-
OTU1044	0.333333	1	0	0	0.333333	2	0	0	5.66667	0	0.333333	0	0	0	p__Basidiomycota	g__Tulostoma	Saprotroph	Soil Saprotroph
OTU234	0	2.66667	1.33333	2	0.333333	1.66667	0	0.333333	0.666667	0	0.333333	0.333333	0	0	p__Ascomycota	g__unclassified_o__Hypocreales	Saprotroph	Undefined Saprotroph
OTU317	0.666667	0	0.333333	0.666667	0	0	8	0	0	0	0	0	0	0	p__Ascomycota	g__Chrysosporium	Saprotroph	Dung Saprotroph-Soil Saprotroph
OTU355	0	0	0.666667	5.66667	0	3.33333	0	0	0	0	0	0	0	0	p__Ascomycota	g__unclassified_f__Lasiosphaeriaceae	Saprotroph	Undefined Saprotroph
OTU1645	0	0.333333	0	0.333333	0	0	0	0	0	0	0	0	9	0	p__Ascomycota	g__Periconia	Pathotroph-Saprotroph-Symbiotroph	Endophyte-Plant Pathogen-Wood Saprotroph
OTU348	0	0	0	9.33333	0	0	0	0	0	0	0.333333	0	0	0	p__Ascomycota	g__Phaeosphaeria	Saprotroph	Undefined Saprotroph
OTU463	1.33333	0	0	0.333333	0	8	0	0	0	0	0	0	0	0	p__Basidiomycota	g__Geminibasidium	Saprotroph	Undefined Saprotroph
OTU1366	0	0	0	0	0	0.333333	0	0	0	0	9.33333	0	0	0	p__Zygomycota	g__unclassified_o__Mortierellales	-	-
OTU496	0	0	0	3.33333	0	2	0	0	0	4.33333	0	0	0	0	p__Ascomycota	g__unclassified_o__Pleosporales	-	-
OTU1301	0	0	0	0	1.66667	0	0	0	0	7.66667	0	0	0	0	p__Ascomycota	g__unclassified_f__Pezizaceae	Saprotroph-Symbiotroph	Dung Saprotroph-Ectomycorrhizal-Litter Saprotroph-Undefined Saprotroph
OTU86	0	1	1	0.333333	0	0	0	0.666667	5.66667	0	0.666667	0	0	0	p__unclassified_k__Fungi	g__unclassified_k__Fungi	-	-
OTU1260	0	3.66667	0	1.66667	0	0	3.33333	0	0	0.666667	0	0	0	0	p__Ascomycota	g__unclassified_p__Ascomycota	-	-
OTU633	1.33333	0	0	0	0.333333	2.66667	0	0	0	3.66667	0	0	1	0.333333	p__unclassified_k__Fungi	g__unclassified_k__Fungi	-	-
OTU270	0	0	0.333333	7	0	0	0	0	0	0	0	2	0	0	p__Ascomycota	g__unclassified_o__Hypocreales	Saprotroph	Undefined Saprotroph
OTU23	0	8	0	1	0	0	0	0	0	0	0.333333	0	0	0	p__unclassified_k__Fungi	g__unclassified_k__Fungi	-	-
OTU1402	0	0	0	1	0	0	0	0	0	0	8.33333	0	0	0	p__Ascomycota	g__unclassified_o__Hypocreales	Saprotroph	Undefined Saprotroph
OTU1928	3.33333	1.66667	1	0.333333	1.33333	0	0	0.666667	0	1	0	0	0	0	p__Ascomycota	g__Aspergillus	Saprotroph	Undefined Saprotroph
OTU1968	0	0	0	0	0	9.33333	0	0	0	0	0	0	0	0	p__Ascomycota	g__unclassified_f__Chaetomiaceae	Pathotroph-Saprotroph-Symbiotroph	Animal Pathogen-Dung Saprotroph-Endophyte-Epiphyte-Plant Saprotroph-Wood Saprotroph
OTU1451	0	0	0	0.666667	0	0	0	1.33333	0	0	0	7.33333	0	0	p__Ascomycota	g__unclassified_f__Sporormiaceae	Saprotroph	Dung Saprotroph-Plant Saprotroph
OTU381	0.666667	0	0	0	4.33333	4.33333	0	0	0	0	0	0	0	0	p__Ascomycota	g__Calceomyces	Saprotroph	Undefined Saprotroph
OTU725	5.33333	0	0	0	0	0	0	0.666667	0	0	0	0	3.33333	0	p__Zygomycota	g__Mortierella	Saprotroph-Symbiotroph	Endophyte-Litter Saprotroph-Soil Saprotroph-Undefined Saprotroph
OTU1215	0	0	0	0	0	2.66667	0	0	0	4.66667	0	1.66667	0	0	p__Ascomycota	g__unclassified_f__norank_o__Pleosporales	-	-
OTU2016	0	0	0	1	0	0.666667	0.666667	0.333333	0	0	5.66667	0	0	0.666667	p__Ascomycota	g__unclassified_f__Onygenaceae	Saprotroph	Dung Saprotroph-Soil Saprotroph
OTU930	0	1.66667	0	0.666667	0	1.66667	3.33333	0.666667	0	0	0	1	0	0	p__unclassified_k__Fungi	g__unclassified_k__Fungi	-	-
OTU1434	0	0	0	0	0	0	0	0	0	0	0.333333	8.66667	0	0	p__Ascomycota	g__Peziza	Saprotroph-Symbiotroph	Dung Saprotroph-Ectomycorrhizal-Litter Saprotroph-Undefined Saprotroph
OTU1109	0.666667	0.333333	0	0	0.333333	0	6	1	0.666667	0	0	0	0	0	p__Ascomycota	g__unclassified_f__Trichocomaceae	Saprotroph	Undefined Saprotroph
OTU760	6	0	0	0	2	0	0	0.333333	0.666667	0	0	0	0	0	p__unclassified_k__Fungi	g__unclassified_k__Fungi	-	-
OTU782	0	0	0	0	0	0	9	0	0	0	0	0	0	0	p__unclassified_k__Fungi	g__unclassified_k__Fungi	-	-
OTU850	0	0	0	0	0	0	9	0	0	0	0	0	0	0	p__unclassified_k__Fungi	g__unclassified_k__Fungi	-	-
OTU823	0	0	0	0	0	4	5	0	0	0	0	0	0	0	p__Ascomycota	g__unclassified_p__Ascomycota	-	-
OTU251	0	0	0	9	0	0	0	0	0	0	0	0	0	0	p__Chytridiomycota	g__Operculomyces	-	-
OTU546	0	0	0	0	0	9	0	0	0	0	0	0	0	0	p__Ascomycota	g__unclassified_p__Ascomycota	-	-
OTU1216	0	0	0	0.666667	0	0	0	0	0.333333	8	0	0	0	0	p__Ascomycota	g__unclassified_p__Ascomycota	-	-
OTU1312	0	1.33333	0	0.666667	0.666667	0	0	0	0	3.66667	0.333333	1	0	1.33333	p__Ascomycota	g__Mycosphaerella	Pathotroph	Plant Pathogen
OTU1685	0.333333	0.666667	0	0	0.333333	4.33333	0	0	0	1.33333	0	0	0	2	p__Basidiomycota	g__Psathyrella	Saprotroph	Wood Saprotroph
OTU1351	0	1.66667	0	0	0.333333	0	0	0.666667	0.666667	0	1.66667	2	0	1.66667	p__Ascomycota	g__unclassified_f__Chaetomiaceae	Pathotroph-Saprotroph-Symbiotroph	Animal Pathogen-Dung Saprotroph-Endophyte-Epiphyte-Plant Saprotroph-Wood Saprotroph
OTU1003	0	0	0	3.66667	0	0	0	0	4.66667	0	0.333333	0	0	0	p__Ascomycota	g__unclassified_f__Magnaporthaceae	Pathotroph	Plant Pathogen
OTU1281	0	0	0	0	0	0	0	0	0	8.66667	0	0	0	0	p__Ascomycota	g__Sclerostagonospora	Saprotroph	Undefined Saprotroph
OTU1560	0	1.66667	0	0	0	0	0	0	0	0	0	0	7	0	p__Ascomycota	g__Shanorella	Saprotroph	Undefined Saprotroph
OTU448	0	0	0	0	8.66667	0	0	0	0	0	0	0	0	0	p__Basidiomycota	g__Melanophyllum	Saprotroph	Undefined Saprotroph
OTU592	0	0	0	0	0	8.66667	0	0	0	0	0	0	0	0	p__Basidiomycota	g__Geastrum	Saprotroph	Undefined Saprotroph
OTU10	0	6.66667	0	0	2	0	0	0	0	0	0	0	0	0	p__unclassified_k__Fungi	g__unclassified_k__Fungi	-	-
OTU1760	0	0.666667	0	0	0	0	0	0	0	0	0.333333	3	0	4.66667	p__unclassified_k__Fungi	g__unclassified_k__Fungi	-	-
OTU905	0	0	0	0	0	0	0	8.66667	0	0	0	0	0	0	p__unclassified_k__Fungi	g__unclassified_k__Fungi	-	-
OTU645	0	0	0	0	0	4.66667	0	0.666667	0	2	0	0	1.33333	0	p__Ascomycota	g__Eutypella	Pathotroph	Plant Pathogen
OTU1363	0	0	0	0	0.666667	0	0	0	0	0	8	0	0	0	p__unclassified_k__Fungi	g__unclassified_k__Fungi	-	-
OTU1197	0	2	0	0	0.666667	0	0	2	0	4	0	0	0	0	p__Basidiomycota	g__unclassified_c__Agaricomycetes	-	-
OTU1043	0	3	0	0.666667	0	0	2.33333	1.66667	1	0	0	0	0	0	p__Ascomycota	g__unclassified_p__Ascomycota	-	-
OTU1002	0	0	0.666667	0	0.333333	0	0	0.333333	3.33333	0	0.333333	3.66667	0	0	p__Ascomycota	g__unclassified_p__Ascomycota	-	-
OTU1083	0	0	0	0	0	0	0	0	4.33333	0	0.333333	4	0	0	p__Basidiomycota	g__Parasola	Saprotroph	Undefined Saprotroph
OTU748	7	0	0	0	0	0	0	0	0	0	0.333333	1.33333	0	0	p__unclassified_k__Fungi	g__unclassified_k__Fungi	-	-
OTU1997	0	0.333333	0	0	0	0	0	0	1.66667	0	0	4.33333	0	2.33333	p__unclassified_k__Fungi	g__unclassified_k__Fungi	-	-
OTU367	0	0	0	7	0.333333	0	0	0	0	0	0	0	0	1.33333	p__Ascomycota	g__unclassified_o__Helotiales	-	-
OTU608	0.333333	0	0	0	0	7.33333	0.333333	0.333333	0	0	0	0	0.333333	0	p__Ascomycota	g__unclassified_o__Onygenales	-	-
OTU1468	1.33333	0	1	0	0.666667	0	0	0	0	0	3	2.33333	0	0.333333	p__Ascomycota	g__Trichoderma	Saprotroph	Undefined Saprotroph
OTU1550	0.666667	2.33333	0	0.333333	0	0	0	0	0	0	0	0	2.33333	3	p__Ascomycota	g__Coniolariella	Saprotroph	Undefined Saprotroph
OTU1945	0.333333	2.33333	0	0	0	2	3.33333	0	0	0	0	0.333333	0.333333	0	p__Ascomycota	g__Ilyonectria	Saprotroph	Undefined Saprotroph
OTU770	0.666667	2	0	0	0	0	0	0	0	0	0	5.66667	0	0	p__Ascomycota	g__Fusarium	Pathotroph-Saprotroph-Symbiotroph	Animal Pathogen-Endophyte-Lichen Parasite-Plant Pathogen-Soil Saprotroph-Wood Saprotroph
OTU943	0	0	0	0	0.333333	2.66667	0	0	2.66667	1.33333	0	0.666667	0	0.666667	p__unclassified_k__Fungi	g__unclassified_k__Fungi	-	-
OTU1735	0	0.333333	0	0	0	0	0	0.666667	0	5	1	0.666667	0	0.666667	p__Basidiomycota	g__Coprinellus	Saprotroph	Dung Saprotroph-Plant Saprotroph-Wood Saprotroph
OTU1066	0	0	0	0	0	0	0	0	8	0	0.333333	0	0	0	p__Ascomycota	g__Fusidium	Saprotroph	Undefined Saprotroph
OTU585	0	0	0	0	0	7	0	0.333333	0	0	0	0	0	1	p__Ascomycota	g__Macrophomina	Pathotroph	Plant Pathogen
OTU1156	0	0	0	0	0	0	0	0	0	8	0	0.333333	0	0	p__unclassified_k__Fungi	g__unclassified_k__Fungi	-	-
OTU820	0	0	0	0	0	0	3	1	0.333333	0.333333	0.666667	0	0	3	p__Ascomycota	g__Phialemoniopsis	-	-
OTU1563	0	0	0	0	0	0	0	0	0	0	0	0	8.33333	0	p__unclassified_k__Fungi	g__unclassified_k__Fungi	-	-
OTU700	8.33333	0	0	0	0	0	0	0	0	0	0	0	0	0	p__Basidiomycota	g__unclassified_c__Agaricomycetes	-	-
OTU581	0	0	0	0	0	8.33333	0	0	0	0	0	0	0	0	p__unclassified_k__Fungi	g__unclassified_k__Fungi	-	-
OTU847	0	1	0	0	0	0	7.33333	0	0	0	0	0	0	0	p__Ascomycota	g__unclassified_o__Pleosporales	-	-
OTU1164	0.333333	0	0	0.333333	0	0	0	0	5.33333	1	0	0.333333	1	0	p__unclassified_k__Fungi	g__unclassified_k__Fungi	-	-
OTU825	0	0	0	0	0	0	7.66667	0.333333	0	0	0	0	0	0	p__Ascomycota	g__Trichothecium	Pathotroph	Plant Pathogen
OTU808	0	0	0	0	0	0	6.66667	0	0	0	0	0.333333	0	1	p__Ascomycota	g__unclassified_p__Ascomycota	-	-
OTU1679	0	1	0	0.333333	0	0	0	0.333333	0	0	0	0.333333	0.333333	5.66667	p__unclassified_k__Fungi	g__unclassified_k__Fungi	-	-
OTU535	0	0	0	0	0	8	0	0	0	0	0	0	0	0	p__Ascomycota	g__unclassified_f__Xylariaceae	Pathotroph-Saprotroph-Symbiotroph	Dung Saprotroph-Endophyte-Plant Pathogen-Undefined Saprotroph
OTU1084	0	0	1	0	0	0	0	0	3.33333	0	0	0	0	3.66667	p__Ascomycota	g__unclassified_p__Ascomycota	-	-
OTU51	0	2.33333	0	0	5.66667	0	0	0	0	0	0	0	0	0	p__unclassified_k__Fungi	g__unclassified_k__Fungi	-	-
OTU1789	0	0	0	0	0	0	0	0	0	0	0	0	6.66667	1.33333	p__unclassified_k__Fungi	g__unclassified_k__Fungi	-	-
OTU564	0	0	0	0	0	8	0	0	0	0	0	0	0	0	p__unclassified_k__Fungi	g__unclassified_k__Fungi	-	-
OTU389	0	0	1	1	3	1	0	0	0	0	0	1.33333	0.666667	0	p__unclassified_k__Fungi	g__unclassified_k__Fungi	-	-
OTU1464	0	0	0	0	0	0.666667	0	0	0	0	1.33333	3	0	3	p__unclassified_k__Fungi	g__unclassified_k__Fungi	-	-
OTU664	7.33333	0	0	0	0.333333	0	0	0	0.333333	0	0	0	0	0	p__unclassified_k__Fungi	g__unclassified_k__Fungi	-	-
OTU1067	0	0	0	0	0	0	0	6.66667	1	0	0	0	0	0	p__Basidiomycota	g__Schizophyllum	Saprotroph	Wood Saprotroph
OTU134	0	0	7.66667	0	0	0	0	0	0	0	0	0	0	0	p__Ascomycota	g__unclassified_f__Cephalothecaceae	Saprotroph	Fungal Parasite-Wood Saprotroph
OTU744	7.66667	0	0	0	0	0	0	0	0	0	0	0	0	0	p__Basidiomycota	g__unclassified_p__Basidiomycota	-	-
OTU217	0	0	0	7.66667	0	0	0	0	0	0	0	0	0	0	p__Ascomycota	g__unclassified_p__Ascomycota	-	-
OTU1019	0	0	0	0	0	0	0	0	7.66667	0	0	0	0	0	p__unclassified_k__Fungi	g__unclassified_k__Fungi	-	-
OTU1407	1.33333	0	0	2	0	1	0	0	1	0.666667	1.66667	0	0	0	p__Ascomycota	g__Scytalidium	Saprotroph	Wood Saprotroph
OTU688	3.66667	0	0	0	0.333333	0	0	0	0.666667	2.33333	0.666667	0	0	0	p__Ascomycota	g__unclassified_p__Ascomycota	-	-
OTU1646	0	0	3.33333	0	0	0	0	0	0	0	0	0	4.33333	0	p__Ascomycota	g__Auxarthron	Saprotroph	Dung Saprotroph-Soil Saprotroph
OTU970	0	0	0	0	0	0	0	6.33333	1.33333	0	0	0	0	0	p__Ascomycota	g__Chaetomium	Pathotroph-Saprotroph-Symbiotroph	Animal Pathogen-Dung Saprotroph-Endophyte-Epiphyte-Plant Saprotroph-Wood Saprotroph
OTU689	5.33333	0	0	0	0	0	0	0	0	0	2.33333	0	0	0	p__Ascomycota	g__unclassified_o__Pleosporales	-	-
OTU1611	0	0	0	0	3	2.66667	0	0	0	0	0	0	1.66667	0	p__Ascomycota	g__Gaeumannomyces	Pathotroph	Plant Pathogen
OTU746	5.66667	0	0	0	0	0	0	0	1.66667	0	0	0	0	0	p__Ascomycota	g__Trichoderma	Saprotroph	Undefined Saprotroph
OTU1144	0	0	0	0	0	0	0	0	0	3.66667	2.66667	1	0	0	p__Ascomycota	g__Curvularia	Pathotroph	Plant Pathogen
OTU406	0	0	0	0.666667	4.66667	0	0	0	0	0	2	0	0	0	p__Ascomycota	g__Cosmospora	Pathotroph	Fungal Parasite
OTU709	0.333333	0	0	0	0	6.66667	0	0	0	0	0.333333	0	0	0	p__Ascomycota	g__unclassified_o__Helotiales	-	-
OTU1256	0.666667	0	0	0	0	6	0	0	0	0.666667	0	0	0	0	p__Ascomycota	g__unclassified_p__Ascomycota	-	-
OTU1403	0	0	0	0	0	0	0	0	0	0	7.33333	0	0	0	p__Zygomycota	g__Mortierella	Saprotroph-Symbiotroph	Endophyte-Litter Saprotroph-Soil Saprotroph-Undefined Saprotroph
OTU1578	0	0	0	1.33333	0	1.66667	0	0	0	0	0	0	4.33333	0	p__Basidiomycota	g__Conocybe	Saprotroph	Undefined Saprotroph
OTU1678	0	0	0	0	0	0	0	0.333333	0.666667	3.33333	0	0	0	3	p__Ascomycota	g__Aspergillus	Saprotroph	Undefined Saprotroph
OTU239	0	0	0	4	0	0	0	3.33333	0	0	0	0	0	0	p__Ascomycota	g__Pyrenochaetopsis	Pathotroph-Saprotroph-Symbiotroph	Endophyte-Lichen Parasite-Undefined Saprotroph
OTU342	0	0	0	7.33333	0	0	0	0	0	0	0	0	0	0	p__Basidiomycota	g__Inocybe	Symbiotroph	Ectomycorrhizal
OTU414	0	0	0	0	7.33333	0	0	0	0	0	0	0	0	0	p__Ascomycota	g__Podospora	Saprotroph-Symbiotroph	Dung Saprotroph-Endophyte-Litter Saprotroph-Undefined Saprotroph
OTU560	0	0	0	0	0	7.33333	0	0	0	0	0	0	0	0	p__Ascomycota	g__Podospora	Saprotroph-Symbiotroph	Dung Saprotroph-Endophyte-Litter Saprotroph-Undefined Saprotroph
OTU781	0	0	0	0	0	0	6.33333	0	1	0	0	0	0	0	p__Basidiomycota	g__unclassified_c__Agaricostilbomycetes	-	-
OTU1522	0	1	0.666667	1	0	1	0	0	0	0	2.33333	0.333333	0	1	p__unclassified_k__Fungi	g__unclassified_k__Fungi	-	-
OTU1650	0	0	0	0	0	0	0	0.666667	1.33333	0	0	1.33333	4	0	p__Ascomycota	g__Pseudallescheria	Saprotroph	Undefined Saprotroph
OTU1455	0	0	0.666667	1	0	0	0	0	0	0.666667	1.66667	0.333333	1.66667	1	p__unclassified_k__Fungi	g__unclassified_k__Fungi	-	-
OTU1170	0	0	0	0.666667	0.333333	0	0	0	1.33333	4.66667	0	0	0	0	p__Ascomycota	g__Chaetomium	Pathotroph-Saprotroph-Symbiotroph	Animal Pathogen-Dung Saprotroph-Endophyte-Epiphyte-Plant Saprotroph-Wood Saprotroph
OTU902	0	0	0	0	0	0	0	5.66667	0	0	1.33333	0	0	0	p__Zygomycota	g__Mortierella	Saprotroph-Symbiotroph	Endophyte-Litter Saprotroph-Soil Saprotroph-Undefined Saprotroph
OTU492	0	0	0.333333	0	0.333333	3.33333	0	0	0	0	1.66667	0.666667	0	0.666667	p__unclassified_k__Fungi	g__unclassified_k__Fungi	-	-
OTU1699	4.66667	0	0	0	0	0	0	0	0	0	0	0	0	2.33333	p__unclassified_k__Fungi	g__unclassified_k__Fungi	-	-
OTU214	0	0	0	5.66667	0	0	0	0	1.33333	0	0	0	0	0	p__unclassified_k__Fungi	g__unclassified_k__Fungi	-	-
OTU1654	0	0	0	0	0	0	0	0	0	0	0	0	7	0	p__Ascomycota	g__unclassified_p__Ascomycota	-	-
OTU573	1.33333	0.333333	1.66667	0	0.333333	0.333333	0	0.333333	0.666667	1	0.666667	0	0	0.333333	p__Ascomycota	g__unclassified_f__Nectriaceae	Saprotroph	Undefined Saprotroph
OTU1960	0	0.333333	0	0	0	0	0.333333	1.33333	0.333333	2.33333	0	2.33333	0	0	p__unclassified_k__Fungi	g__unclassified_k__Fungi	-	-
OTU652	2.66667	0	1	0	0.333333	0	0	0	0.666667	0	1.66667	0	0	0.333333	p__unclassified_k__Fungi	g__unclassified_k__Fungi	-	-
OTU854	0	0	0.333333	0	0	0	2.66667	0	0	0	0	3.66667	0	0	p__Ascomycota	g__Phialosimplex	Saprotroph	Undefined Saprotroph
OTU1118	0	0	0	0	0	0	0	0	0	6.66667	0	0	0	0	p__Basidiomycota	g__Tomentella	Symbiotroph	Ectomycorrhizal
OTU390	0	0	0	0	5	0	0	0	0	0	0	0	0	1.66667	p__Basidiomycota	g__unclassified_f__Agaricaceae	Saprotroph	Undefined Saprotroph
OTU458	0	0	0	0	0	6.66667	0	0	0	0	0	0	0	0	p__Ascomycota	g__unclassified_f__Arthrodermataceae	Pathotroph-Saprotroph	Animal Pathogen-Undefined Saprotroph
OTU579	0	0	0	0	0	6.66667	0	0	0	0	0	0	0	0	p__Ascomycota	g__Cyphellophora	Pathotroph-Symbiotroph	Epiphyte-Plant Pathogen
OTU932	0	0	0	0	0	0	0	6.66667	0	0	0	0	0	0	p__Ascomycota	g__Corynascus	Saprotroph	Undefined Saprotroph
OTU829	0	0	0	0	0	0	6.66667	0	0	0	0	0	0	0	p__unclassified_k__Fungi	g__unclassified_k__Fungi	-	-
OTU1432	0	0	0	0	0	0	0	0	0	0	0	6.66667	0	0	p__Ascomycota	g__unclassified_p__Ascomycota	-	-
OTU1268	0	0	0	0	0	0	0	0	0	6.66667	0	0	0	0	p__Ascomycota	g__unclassified_f__norank_o__Pleosporales	-	-
OTU262	0.333333	0.666667	0	0.666667	0.666667	0	2	1.33333	0	0	1	0	0	0	p__Ascomycota	g__unclassified_f__Nectriaceae	Saprotroph	Undefined Saprotroph
OTU1655	0	0	0	0	0.333333	0	0	2.66667	0	0	0	1.33333	2.33333	0	p__Ascomycota	g__Trichoderma	Saprotroph	Undefined Saprotroph
OTU1011	2.33333	0	0	0.666667	0	0	0	0	2.33333	0	0.333333	0.333333	0.666667	0	p__Basidiomycota	g__Melanophyllum	Saprotroph	Undefined Saprotroph
OTU543	0	0	0	0	0	5.33333	0	0	1.33333	0	0	0	0	0	p__Ascomycota	g__unclassified_f__Pyronemataceae	Saprotroph-Symbiotroph	Dung Saprotroph-Ectomycorrhizal-Soil Saprotroph-Wood Saprotroph
OTU259	0	0	0	1.66667	4.66667	0	0	0	0	0	0	0	0	0	p__Ascomycota	g__unclassified_o__Hypocreales	Saprotroph	Undefined Saprotroph
OTU722	1	0	0	0.333333	2.66667	0	0	0	0	0	0.666667	0	1.66667	0	p__unclassified_k__Fungi	g__unclassified_k__Fungi	-	-
OTU819	0	0	0	0	0	2.66667	3.66667	0	0	0	0	0	0	0	p__Ascomycota	g__Arachnomyces	Saprotroph	Dung Saprotroph
OTU844	0	0	0	0	0	0	5.66667	0	0	0	0	0	0.666667	0	p__Ascomycota	g__unclassified_f__Chaetomiaceae	Pathotroph-Saprotroph-Symbiotroph	Animal Pathogen-Dung Saprotroph-Endophyte-Epiphyte-Plant Saprotroph-Wood Saprotroph
OTU1367	0.666667	0.666667	0.333333	0.333333	0.333333	0.333333	0	0	0	0	2.66667	0	1	0	p__Chytridiomycota	g__unclassified_f__Spizellomycetaceae	Pathotroph	Plant Pathogen-Undefined Parasite-Undefined Saprotroph
OTU1879	5.66667	0.333333	0	0	0.333333	0	0	0	0	0	0	0	0	0	p__Ascomycota	g__Acremonium	Pathogen-Saprotroph-Symbiotroph	Animal Pathogen-Endophyte-Fungal Parasite-Plant Pathogen-Wood Saprotroph
OTU751	4.66667	0	0	0.333333	0	1.33333	0	0	0	0	0	0	0	0	p__unclassified_k__Fungi	g__unclassified_k__Fungi	-	-
OTU667	0.666667	0	0.666667	0.666667	0	0.333333	0	0	2.33333	0	0	0	1	0.666667	p__unclassified_k__Fungi	g__unclassified_k__Fungi	-	-
OTU105	0	3.33333	0	0	0	1	0	0	1	0	1	0	0	0	p__Ascomycota	g__Thielavia	Saprotroph	Dung Saprotroph-Undefined Saprotroph
OTU1209	0	0	0	0	0	0	0	0	0	6.33333	0	0	0	0	p__Basidiomycota	g__Entoloma	Pathotroph-Saprotroph-Symbiotroph	Ectomycorrhizal-Fungal Parasite-Soil Saprotroph-Undefined Saprotroph
OTU1338	0	0	0	0	0	0	0	0	0	0	6.33333	0	0	0	p__Basidiomycota	g__Conocybe	Saprotroph	Undefined Saprotroph
OTU563	0	3	0	0	0	3.33333	0	0	0	0	0	0	0	0	p__Ascomycota	g__Lopadostoma	Saprotroph	Undefined Saprotroph
OTU643	0	0	0	0	0	6.33333	0	0	0	0	0	0	0	0	p__Ascomycota	g__Nemania	Saprotroph	Undefined Saprotroph
OTU1081	0	0	0	0	1.33333	0	0	0	5	0	0	0	0	0	p__Ascomycota	g__unclassified_p__Ascomycota	-	-
OTU1430	0.666667	1.33333	0	0	0	0	0	0	0	0	3	0	1.33333	0	p__Glomeromycota	g__Glomus	Symbiotroph	Arbuscular Mycorrhizal
OTU1165	0	0	0	0	0	0	0	0	0.333333	4	0	0	0	1.66667	p__Ascomycota	g__Simplicillium	Pathotroph	Animal Pathogen
OTU446	0	0	2.66667	0	0.333333	0	0	0	0	0	0	0	3	0	p__Ascomycota	g__Sagenomella	Saprotroph	Undefined Saprotroph
OTU253	0	3.33333	0	2.66667	0	0	0	0	0	0	0	0	0	0	p__Ascomycota	g__unclassified_f__Xylariaceae	Pathotroph-Saprotroph-Symbiotroph	Dung Saprotroph-Endophyte-Plant Pathogen-Undefined Saprotroph
OTU74	0	0	0	5	1	0	0	0	0	0	0	0	0	0	p__Ascomycota	g__Podospora	Saprotroph-Symbiotroph	Dung Saprotroph-Endophyte-Litter Saprotroph-Undefined Saprotroph
OTU881	0.333333	0	0	0	0	1.66667	0	2.33333	0	0	0	1	0	0.666667	p__Ascomycota	g__Hirsutella	Pathotroph	Animal Pathogen
OTU994	0	0	0	0	0	0	0	6	0	0	0	0	0	0	p__unclassified_k__Fungi	g__unclassified_k__Fungi	-	-
OTU462	0	0	0	0	0	6	0	0	0	0	0	0	0	0	p__unclassified_k__Fungi	g__unclassified_k__Fungi	-	-
OTU120	0	6	0	0	0	0	0	0	0	0	0	0	0	0	p__unclassified_k__Fungi	g__unclassified_k__Fungi	-	-
OTU541	0	0	0	0	0	6	0	0	0	0	0	0	0	0	p__unclassified_k__Fungi	g__unclassified_k__Fungi	-	-
OTU1122	0	0	0	0	0	0	0	0	0	6	0	0	0	0	p__Ascomycota	g__unclassified_c__Sordariomycetes	-	-
OTU1360	0	0	0	0	0	0	0	0	0	0	6	0	0	0	p__Ascomycota	g__unclassified_o__Helotiales	-	-
OTU549	0	0	0	0	0	6	0	0	0	0	0	0	0	0	p__unclassified_k__Fungi	g__unclassified_k__Fungi	-	-
OTU745	5	0	0	0	0.666667	0	0	0	0	0.333333	0	0	0	0	p__unclassified_k__Fungi	g__unclassified_k__Fungi	-	-
OTU1149	0	0	0	0.333333	0.333333	0.666667	0	0	0	0.666667	0.333333	0.333333	0.333333	3	p__unclassified_k__Fungi	g__unclassified_k__Fungi	-	-
OTU93	0	5.33333	0	0	0	0	0	0	0	0	0	0	0	0.666667	p__Ascomycota	g__Strelitziana	Pathotroph	Plant Pathogen
OTU1069	0	0	0	0	0	0	0	0	5.66667	0	0	0	0	0	p__Ascomycota	g__Pseudaleuria	Saprotroph	Undefined Saprotroph
OTU1382	0	0	0	0	0	0	0	0	0	0	5.66667	0	0	0	p__Basidiomycota	g__Eocronartium	Pathotroph	Plant Pathogen
OTU552	0	0	0	0	0	5.66667	0	0	0	0	0	0	0	0	p__Ascomycota	g__Myxotrichum	Saprotroph-Symbiotroph	Dung Saprotroph-Ericoid Mycorrhizal-Lichenized
OTU39	0	5.66667	0	0	0	0	0	0	0	0	0	0	0	0	p__unclassified_k__Fungi	g__unclassified_k__Fungi	-	-
OTU1192	0	0	0	0	0	0	0	0	0	5.66667	0	0	0	0	p__unclassified_k__Fungi	g__unclassified_k__Fungi	-	-
OTU619	0	0	0	0	0	5.66667	0	0	0	0	0	0	0	0	p__unclassified_k__Fungi	g__unclassified_k__Fungi	-	-
OTU376	0	0	0	5.66667	0	0	0	0	0	0	0	0	0	0	p__unclassified_k__Fungi	g__unclassified_k__Fungi	-	-
OTU614	0	0	0	0	0	5.66667	0	0	0	0	0	0	0	0	p__Ascomycota	g__Paraphoma	-	-
OTU1487	0	0.666667	0	0	0	0	0	0	0	0	0	5	0	0	p__Basidiomycota	g__Eocronartium	Pathotroph	Plant Pathogen
OTU173	0	0	3.66667	0	0	0	0	0	0	0	1.33333	0	0.666667	0	p__Ascomycota	g__Thielavia	Saprotroph	Dung Saprotroph-Undefined Saprotroph
OTU499	0	0	0.666667	0	0	5	0	0	0	0	0	0	0	0	p__Basidiomycota	g__Entoloma	Pathotroph-Saprotroph-Symbiotroph	Ectomycorrhizal-Fungal Parasite-Soil Saprotroph-Undefined Saprotroph
OTU1370	0	0.666667	0	0	0	0	0	0	0	0	2	0	3	0	p__unclassified_k__Fungi	g__unclassified_k__Fungi	-	-
OTU1095	0	2	0	0.666667	1	0	0.333333	0.333333	0.333333	0	0.333333	0	0	0.666667	p__Ascomycota	g__Ochroconis	Saprotroph	Undefined Saprotroph
OTU115	0.333333	3.33333	0	0	0	1.66667	0	0	0	0	0	0	0.333333	0	p__Ascomycota	g__Arthroderma	Pathotroph-Saprotroph	Animal Pathogen-Undefined Saprotroph
OTU1400	0.333333	0	0	0	1	0	0	2.33333	0	1.66667	0.333333	0	0	0	p__Ascomycota	g__Penicillium	Saprotroph	Undefined Saprotroph
OTU559	0	0.333333	0	0.333333	0	3	0	0	0	1	0	0	0	1	p__Ascomycota	g__Plectania	Saprotroph	Undefined Saprotroph
OTU206	0.333333	0	0	1	0	0	0	0	0.333333	0	1.33333	1.66667	0	1	p__unclassified_k__Fungi	g__unclassified_k__Fungi	-	-
OTU445	0	0.333333	0	0.333333	0.666667	0	0	0	0	0.333333	0	0	2.66667	1.33333	p__Ascomycota	g__unclassified_f__Dothioraceae	-	-
OTU606	0.333333	0	0	0	0	5.33333	0	0	0	0	0	0	0	0	p__Basidiomycota	g__Entoloma	Pathotroph-Saprotroph-Symbiotroph	Ectomycorrhizal-Fungal Parasite-Soil Saprotroph-Undefined Saprotroph
OTU704	4	0	0	0	0	0	0	1.33333	0	0	0	0.333333	0	0	p__Ascomycota	g__Acremonium	Pathogen-Saprotroph-Symbiotroph	Animal Pathogen-Endophyte-Fungal Parasite-Plant Pathogen-Wood Saprotroph
OTU1099	0	0	0	0	0.333333	0	0	0	5.33333	0	0	0	0	0	p__unclassified_k__Fungi	g__unclassified_k__Fungi	-	-
OTU1985	0	1.66667	0	0	0.333333	0	0	1.66667	0.666667	0.666667	0	0.333333	0	0	p__Ascomycota	g__unclassified_f__Nectriaceae	Saprotroph	Undefined Saprotroph
OTU909	0	0	0	2.66667	0	0	0	1	0	0	0	0	1.66667	0	p__unclassified_k__Fungi	g__unclassified_k__Fungi	-	-
OTU1689	2.66667	0	0	0	0	0	0	0	0	0	0	1	0	1.66667	p__unclassified_k__Fungi	g__unclassified_k__Fungi	-	-
OTU1811	0	2.66667	0.666667	0	0	0	0	0	0	0	0	0	2	0	p__Ascomycota	g__unclassified_f__Glomerellaceae	Pathotroph-Symbiotroph	Endophyte-Plant Pathogen
OTU1433	0	0	0	0	0	0	0	0	0	0	0.666667	4.66667	0	0	p__Blastocladiomycota	g__unclassified_p__Blastocladiomycota	-	-
OTU1584	0	0	0	0	0	0	0	0	0.666667	0	0	0	4.66667	0	p__unclassified_k__Fungi	g__unclassified_k__Fungi	-	-
OTU1729	0	0.333333	0.333333	0	0	1.66667	0	0	0	0	0	0	0	3	p__unclassified_k__Fungi	g__unclassified_k__Fungi	-	-
OTU816	0	0.666667	0	0	0	0	2.33333	0	0.666667	0	0	0	0	1.66667	p__Ascomycota	g__Stachybotrys	Saprotroph	Undefined Saprotroph
OTU1399	0	0	0.333333	0	0	0	0	0	0	0	5	0	0	0	p__Chytridiomycota	g__Rhizophlyctis	Saprotroph	Undefined Saprotroph
OTU1714	3.66667	0	0	0	0	0	0	0	0	0	0	0.333333	0	1.33333	p__Ascomycota	g__Exophiala	Pathotroph-Saprotroph	Animal Pathogen-Undefined Saprotroph
OTU1817	1.33333	0	0	0	0	2.66667	0	0.333333	1	0	0	0	0	0	p__Ascomycota	g__Chaetomium	Pathotroph-Saprotroph-Symbiotroph	Animal Pathogen-Dung Saprotroph-Endophyte-Epiphyte-Plant Saprotroph-Wood Saprotroph
OTU227	0	0	0	5	0	0	0	0	0.333333	0	0	0	0	0	p__Ascomycota	g__unclassified_o__Hypocreales	Saprotroph	Undefined Saprotroph
OTU1009	1.66667	0	0	0.333333	0	0	0	0	1	0	0	0	0	2.33333	p__Chytridiomycota	g__unclassified_o__Monoblepharidales	-	-
OTU507	0	0	0.333333	0	0	5	0	0	0	0	0	0	0	0	p__unclassified_k__Fungi	g__unclassified_k__Fungi	-	-
OTU1858	0.333333	0	0	0	0	0	2	3	0	0	0	0	0	0	p__Ascomycota	g__unclassified_p__Ascomycota	-	-
OTU1175	0.333333	0	0	0	0	0	0	0	0	5	0	0	0	0	p__Ascomycota	g__unclassified_p__Ascomycota	-	-
OTU1055	0	0	0	0.333333	0.666667	0	0	1	3.33333	0	0	0	0	0	p__Ascomycota	g__Scutellinia	Saprotroph	Undefined Saprotroph
OTU809	0	0	0	0	0	0	5.33333	0	0	0	0	0	0	0	p__Ascomycota	g__Chrysosporium	Saprotroph	Dung Saprotroph-Soil Saprotroph
OTU852	0	0	0	0	0	0	5.33333	0	0	0	0	0	0	0	p__Ascomycota	g__unclassified_f__Herpotrichiellaceae	Pathotroph-Saprotroph	Animal Pathogen-Fungal Parasite-Undefined Saprotroph
OTU817	0	0	0	2	0	0	3.33333	0	0	0	0	0	0	0	p__Ascomycota	g__Paraphoma	-	-
OTU918	0	0	0.333333	0	0	0	0	4.33333	0.666667	0	0	0	0	0	p__unclassified_k__Fungi	g__unclassified_k__Fungi	-	-
OTU453	0	0	0	0	4.33333	0	0	1	0	0	0	0	0	0	p__unclassified_k__Fungi	g__unclassified_k__Fungi	-	-
OTU471	0	0	0	0	0	5.33333	0	0	0	0	0	0	0	0	p__Ascomycota	g__unclassified_c__Eurotiomycetes	-	-
OTU1547	0	0	0	0	0	0	0	0	0	1	0	0	4.33333	0	p__Ascomycota	g__unclassified_c__Sordariomycetes	-	-
OTU3	0	1.33333	0	0	0.666667	0	0	0	1.66667	0	0	1.33333	0	0.333333	p__unclassified_k__Fungi	g__unclassified_k__Fungi	-	-
OTU1373	0.333333	0	0.333333	1.33333	0.333333	0	0	0	1.33333	0	1.66667	0	0	0	p__Ascomycota	g__unclassified_p__Ascomycota	-	-
OTU1749	0.333333	0	0	0	0	0.333333	0	0	0	0	0.333333	0	1.33333	3	p__unclassified_k__Fungi	g__unclassified_k__Fungi	-	-
OTU1092	0	0	0	1.33333	0	0.666667	0	0	2.33333	0	0	0	1	0	p__Zygomycota	g__Ramicandelaber	Saprotroph	Undefined Saprotroph
OTU1838	0	0	0.666667	1.33333	0	0	0	0	3.33333	0	0	0	0	0	p__Ascomycota	g__Chrysosporium	Saprotroph	Dung Saprotroph-Soil Saprotroph
OTU955	0	2.33333	0	0.666667	0	0	0	2.33333	0	0	0	0	0	0	p__Ascomycota	g__Knufia	Pathotroph-Saprotroph	Animal Pathogen-Plant Pathogen-Soil Saprotroph-Undefined Saprotroph
OTU1872	0.333333	0	0	1.33333	0	0	0	3.33333	0	0	0	0	0	0.333333	p__Ascomycota	g__unclassified_f__Gymnoascaceae	Saprotroph	Dung Saprotroph-Plant Saprotroph
OTU422	0	0	1.66667	0.666667	2.66667	0	0	0	0	0	0	0	0	0	p__Ascomycota	g__unclassified_f__Clavicipitaceae	Saprotroph	Undefined Saprotroph
OTU283	0	0	0	2	0	2.66667	0	0	0	0.333333	0	0	0	0	p__Ascomycota	g__Paraphoma	-	-
OTU1541	0	0	0	0	0	0	0	0	0	0	0	0	5	0	p__Ascomycota	g__Gymnoascoideus	Saprotroph	Undefined Saprotroph
OTU1601	0	0	0	0	0	0	0	1.33333	0	0	0	0	3.66667	0	p__Basidiomycota	g__Cryptococcus	Pathotroph-Saprotroph-Symbiotroph	Fungal Parasite-Undefined Saprotroph
OTU504	0	0	0	0	0	3.33333	0	0	0	1.66667	0	0	0	0	p__Ascomycota	g__Paraconiothyrium	Saprotroph	Undefined Saprotroph
OTU545	0	0	0	1.33333	0	3.66667	0	0	0	0	0	0	0	0	p__Ascomycota	g__unclassified_p__Ascomycota	-	-
OTU1353	0	0	0	0	0	0	0	0	1	0	4	0	0	0	p__unclassified_k__Fungi	g__unclassified_k__Fungi	-	-
OTU595	0	0	0	0	0	5	0	0	0	0	0	0	0	0	p__unclassified_k__Fungi	g__unclassified_k__Fungi	-	-
OTU523	0	0	0	0	0	5	0	0	0	0	0	0	0	0	p__unclassified_k__Fungi	g__unclassified_k__Fungi	-	-
OTU1528	0	0.666667	0	0	0.666667	0	0	0	0.666667	0	1	0.666667	1.33333	0	p__Basidiomycota	g__Rhodosporidium	Saprotroph	Undefined Saprotroph
OTU461	0	0.666667	0	0	0	4.33333	0	0	0	0	0	0	0	0	p__unclassified_k__Fungi	g__unclassified_k__Fungi	-	-
OTU1950	0	0	0	0	0	0	3.33333	0.333333	0.333333	0	0	0.333333	0	0.666667	p__unclassified_k__Fungi	g__unclassified_k__Fungi	-	-
OTU1669	0	0	0.333333	0	0	0.666667	0	0.333333	0	0	0	0.333333	0	3.33333	p__Basidiomycota	g__Geastrum	Saprotroph	Undefined Saprotroph
OTU1087	0	0	0	0	0	0	0	0	3.33333	0	0.333333	1.33333	0	0	p__unclassified_k__Fungi	g__unclassified_k__Fungi	-	-
OTU1388	0.333333	0	0.333333	0	0.666667	0	0	0	1.66667	0	1.66667	0	0	0	p__unclassified_k__Fungi	g__unclassified_k__Fungi	-	-
OTU242	0	0	0	4.66667	0	0	0	0	0	0	0	0	0	0	p__Ascomycota	g__Geopora	Symbiotroph	Ectomycorrhizal
OTU311	0	0	0	4.66667	0	0	0	0	0	0	0	0	0	0	p__Ascomycota	g__Candida	Saprotroph	Undefined Saprotroph
OTU540	0	0	0	0	0	4.66667	0	0	0	0	0	0	0	0	p__unclassified_k__Fungi	g__unclassified_k__Fungi	-	-
OTU642	0	0	0	0	0	4.66667	0	0	0	0	0	0	0	0	p__unclassified_k__Fungi	g__unclassified_k__Fungi	-	-
OTU485	0	0	0	0	0	4.66667	0	0	0	0	0	0	0	0	p__unclassified_k__Fungi	g__unclassified_k__Fungi	-	-
OTU440	0	0	0	0	4.66667	0	0	0	0	0	0	0	0	0	p__Ascomycota	g__unclassified_p__Ascomycota	-	-
OTU702	2	0	0	0.333333	0	0	0	0	0	0	1.66667	0.666667	0	0	p__unclassified_k__Fungi	g__unclassified_k__Fungi	-	-
OTU1022	0	0	0	3.66667	0	0	0	0	1	0	0	0	0	0	p__unclassified_k__Fungi	g__unclassified_k__Fungi	-	-
OTU1418	0	0	0	0	0	0	0	0	0	0	2.66667	2	0	0	p__unclassified_k__Fungi	g__unclassified_k__Fungi	-	-
OTU144	0	1	2.66667	1	0	0	0	0	0	0	0	0	0	0	p__unclassified_k__Fungi	g__unclassified_k__Fungi	-	-
OTU1681	0.333333	0	0	0.333333	0	0	0.333333	1	0	0	0	0	0	2.66667	p__Chytridiomycota	g__unclassified_c__Chytridiomycetes	-	-
OTU1235	0	0	0	0.333333	0	0	0	0	0	4.33333	0	0	0	0	p__Ascomycota	g__Didymella	Pathotroph-Saprotroph	Animal Pathogen-Plant Pathogen-Undefined Saprotroph
OTU318	0	0	0	4.33333	0	0	0	0.333333	0	0	0	0	0	0	p__Ascomycota	g__Thelonectria	Saprotroph	Leaf Saprotroph
OTU506	0.333333	0.333333	0.333333	0.333333	0	1.33333	0	0	1	0	0	0.333333	0.666667	0	p__Ascomycota	g__unclassified_f__Nectriaceae	Saprotroph	Undefined Saprotroph
OTU332	0	0	0	2.33333	2.33333	0	0	0	0	0	0	0	0	0	p__Ascomycota	g__Fusarium	Pathotroph-Saprotroph-Symbiotroph	Animal Pathogen-Endophyte-Lichen Parasite-Plant Pathogen-Soil Saprotroph-Wood Saprotroph
OTU1286	0	0	0	0	0	0	0	0	0	3.33333	1.33333	0	0	0	p__Basidiomycota	g__unclassified_c__Microbotryomycetes	-	-
OTU1436	0	0	0	0	0	0	0	0	0	0	0	3.66667	0	0.666667	p__Ascomycota	g__Savoryella	Saprotroph	Undefined Saprotroph
OTU279	0	1.66667	0	2	0	0	0	0	0	0.666667	0	0	0	0	p__Basidiomycota	g__unclassified_c__Agaricomycetes	-	-
OTU1443	0	0	0	0	0	0	0	0	0	0.666667	0	3.66667	0	0	p__Ascomycota	g__unclassified_o__Sordariales	-	-
OTU940	0.666667	0.333333	0	0	0	0	0	1.66667	0.333333	0	0.333333	1	0	0	p__unclassified_k__Fungi	g__unclassified_k__Fungi	-	-
OTU1700	0	0.666667	0.666667	0	0	0	0	0	0	0	0	0	0	3	p__unclassified_k__Fungi	g__unclassified_k__Fungi	-	-
OTU1068	0	0	0	0.333333	0.333333	0	0	0.666667	2	0	0	1	0	0	p__Ascomycota	g__unclassified_f__Nectriaceae	Saprotroph	Undefined Saprotroph
OTU1205	0.666667	0	0.333333	0	0	0.333333	0	0.666667	0	2	0.333333	0	0	0	p__Chytridiomycota	g__Powellomyces	Pathotroph	Plant Pathogen
OTU1392	1.66667	1.33333	0	0.333333	0	0	0	0	0.666667	0	0.333333	0	0	0	p__Ascomycota	g__Microascus	Pathotroph-Saprotroph-Symbiotroph	Animal Pathogen-Endophyte-Plant Pathogen-Undefined Saprotroph
OTU1539	0	0	0	0	0.333333	0	0	0	3	0	0	1	0	0	p__Ascomycota	g__Phialosimplex	Saprotroph	Undefined Saprotroph
OTU1647	0	0	0	0	0.333333	0	0	0	0	0	0	0	4	0	p__Ascomycota	g__Heterospora	Pathotroph-Saprotroph	Plant Pathogen-Wood Saprotroph
OTU813	0	0	3	0.333333	0	0	1	0	0	0	0	0	0	0	p__Ascomycota	g__Phialosimplex	Saprotroph	Undefined Saprotroph
OTU799	0	0	0	0	0	0	4	0	0	0	0	0.333333	0	0	p__unclassified_k__Fungi	g__unclassified_k__Fungi	-	-
OTU684	4	0	0	0.333333	0	0	0	0	0	0	0	0	0	0	p__Ascomycota	g__unclassified_o__Helotiales	-	-
OTU1124	0	0	0	0	0	0	0	0	0	4.33333	0	0	0	0	p__Ascomycota	g__Leptosphaeria	Pathotroph	Plant Pathogen
OTU1935	0	0	0	0.333333	0	0.666667	2.33333	1	0	0	0	0	0	0	p__Ascomycota	g__Purpureocillium	Pathotroph	Fungal Parasite
OTU1785	0	0	0	0	0	0	0	0	0	0	0	0	0	4.33333	p__Ascomycota	g__unclassified_p__Ascomycota	-	-
OTU312	0	0	0	4.33333	0	0	0	0	0	0	0	0	0	0	p__Ascomycota	g__unclassified_p__Ascomycota	-	-
OTU517	0	0	0	0	0	4.33333	0	0	0	0	0	0	0	0	p__unclassified_k__Fungi	g__unclassified_k__Fungi	-	-
OTU814	0	0	0	0	0	0	4.33333	0	0	0	0	0	0	0	p__unclassified_k__Fungi	g__unclassified_k__Fungi	-	-
OTU893	0.333333	0	1.33333	0	0	0	0	0.333333	0	0	0	2.33333	0	0	p__Basidiomycota	g__Xylodon	Saprotroph	Undefined Saprotroph
OTU1225	0	0	0	0	0	0	0	0	0	2	0	0	1.66667	0.333333	p__Basidiomycota	g__Coprinellus	Saprotroph	Dung Saprotroph-Plant Saprotroph-Wood Saprotroph
OTU1599	0	0	0	0.333333	0	0	0	0	0	0	0	0	3.66667	0	p__Ascomycota	g__Aphanoascus	Saprotroph	Dung Saprotroph-Soil Saprotroph
OTU639	0	0	0	0	0	0.333333	0	0	0	0	0	3.66667	0	0	p__Ascomycota	g__unclassified_o__Hypocreales	Saprotroph	Undefined Saprotroph
OTU178	0.666667	0	0.333333	0	0	0.333333	0	0	0	0	0	0.666667	0.333333	1.66667	p__unclassified_k__Fungi	g__unclassified_k__Fungi	-	-
OTU624	0	0	0.333333	0	0	1.66667	0	0	0	0	0	0	2	0	p__unclassified_k__Fungi	g__unclassified_k__Fungi	-	-
OTU1057	0	0	0	0	0	0	0	0	4	0	0	0	0	0	p__Ascomycota	g__unclassified_o__Hypocreales	Saprotroph	Undefined Saprotroph
OTU1219	0	0	0	0	0	0	0	0	0	1	0	0	3	0	p__Basidiomycota	g__unclassified_f__Psathyrellaceae	Saprotroph	Dung Saprotroph-Plant Saprotroph-Wood Saprotroph
OTU1243	0	0	0	0	0	0	0	0	1.66667	2.33333	0	0	0	0	p__Basidiomycota	g__Heterochaete	Saprotroph	Undefined Saprotroph
OTU1634	0	0	0	0	0	0	0	2.33333	0	0	0	0	1.66667	0	p__Ascomycota	g__unclassified_f__Lasiosphaeriaceae	Saprotroph	Undefined Saprotroph
OTU1637	0	0	0	0	0	0	0	0	0	0	0	0	4	0	p__Ascomycota	g__Chaetomium	Pathotroph-Saprotroph-Symbiotroph	Animal Pathogen-Dung Saprotroph-Endophyte-Epiphyte-Plant Saprotroph-Wood Saprotroph
OTU1979	0	0	0	0	0	0	0	4	0	0	0	0	0	0	p__Ascomycota	g__Arthrographis	Saprotroph	Undefined Saprotroph
OTU576	0	0	0	0	0	4	0	0	0	0	0	0	0	0	p__norank	g__Aporospora	Saprotroph	Wood Saprotroph
OTU604	0	0	0	0	0	4	0	0	0	0	0	0	0	0	p__Ascomycota	g__unclassified_f__Nectriaceae	Saprotroph	Undefined Saprotroph
OTU703	4	0	0	0	0	0	0	0	0	0	0	0	0	0	p__Ascomycota	g__Microascus	Pathotroph-Saprotroph-Symbiotroph	Animal Pathogen-Endophyte-Plant Pathogen-Undefined Saprotroph
OTU754	1.66667	0	0	0	0	2.33333	0	0	0	0	0	0	0	0	p__Ascomycota	g__unclassified_f__Ceratostomataceae	Pathotroph-Saprotroph	Fungal Parasite-Plant Saprotroph-Soil Saprotroph
OTU83	0	4	0	0	0	0	0	0	0	0	0	0	0	0	p__Ascomycota	g__Acremonium	Pathogen-Saprotroph-Symbiotroph	Animal Pathogen-Endophyte-Fungal Parasite-Plant Pathogen-Wood Saprotroph
OTU971	0	0	0	0	0	0	0	4	0	0	0	0	0	0	p__Ascomycota	g__Stachybotrys	Saprotroph	Undefined Saprotroph
OTU1515	0	0	0.666667	0	0	0	0	0	0	0	0.333333	3	0	0	p__Ascomycota	g__unclassified_p__Ascomycota	-	-
OTU1575	0	0	0	0	0	0	0	0	0	0	0	0	4	0	p__unclassified_k__Fungi	g__unclassified_k__Fungi	-	-
OTU803	0	0	0	0	0	0	4	0	0	0	0	0	0	0	p__unclassified_k__Fungi	g__unclassified_k__Fungi	-	-
OTU1127	0	0	0	0	0	1.66667	0	0	0	2.33333	0	0	0	0	p__Basidiomycota	g__unclassified_o__Agaricales	-	-
OTU880	0	0	0	0	0	0	0	4	0	0	0	0	0	0	p__unclassified_k__Fungi	g__unclassified_k__Fungi	-	-
OTU1046	1.33333	0	0	0	0	1.66667	0	0	0.666667	0	0.333333	0	0	0	p__Ascomycota	g__unclassified_c__Sordariomycetes	-	-
OTU1380	0	0	0	0	0	0	0	1.33333	0	0	0	2.66667	0	0	p__Ascomycota	g__unclassified_c__Sordariomycetes	-	-
OTU915	0	0	0	0	0	0	0	4	0	0	0	0	0	0	p__unclassified_k__Fungi	g__unclassified_k__Fungi	-	-
OTU1877	0	0	0	0	0	0	0	0	0	0	0	1.33333	2.66667	0	p__unclassified_k__Fungi	g__unclassified_k__Fungi	-	-
OTU1741	0	0	0	0	0	0	0	0	0	0	0	0	0	4	p__unclassified_k__Fungi	g__unclassified_k__Fungi	-	-
OTU1282	0	0	1	0	0	2.33333	0	0	0	0.666667	0	0	0	0	p__Ascomycota	g__unclassified_f__Sporormiaceae	Saprotroph	Dung Saprotroph-Plant Saprotroph
OTU9	0	2.33333	0	0.666667	0	0	0	0	0	0	0	0.666667	0	0.333333	p__unclassified_k__Fungi	g__unclassified_k__Fungi	-	-
OTU853	0	0	0	0	0	0	3.33333	0.666667	0	0	0	0	0	0	p__unclassified_k__Fungi	g__unclassified_k__Fungi	-	-
OTU638	0	0	0.666667	0	0	3.33333	0	0	0	0	0	0	0	0	p__Ascomycota	g__unclassified_c__Eurotiomycetes	-	-
OTU669	1	0	1.33333	1	0	0	0	0	0	0	0.666667	0	0	0	p__Zygomycota	g__Ramicandelaber	Saprotroph	Undefined Saprotroph
OTU731	2	0	0	0	0	0	0	0	0	1.33333	0.666667	0	0	0	p__Ascomycota	g__Vermispora	-	-
OTU1054	0.333333	0	0.333333	0	0	0	0	0.333333	1.33333	0.333333	0.666667	0	0	0.666667	p__unclassified_k__Fungi	g__unclassified_k__Fungi	-	-
OTU647	1.33333	0.333333	0	0.666667	0	0.666667	0	0.333333	0.333333	0	0	0	0.333333	0	p__Ascomycota	g__unclassified_f__Nectriaceae	Saprotroph	Undefined Saprotroph
OTU1409	1	0	0.333333	1.33333	0	0	0	0	0	0	1.33333	0	0	0	p__Zygomycota	g__Ramicandelaber	Saprotroph	Undefined Saprotroph
OTU861	0	1.33333	0	0.333333	0	0	0	1	1.33333	0	0	0	0	0	p__Ascomycota	g__unclassified_f__Lasiosphaeriaceae	Saprotroph	Undefined Saprotroph
OTU1071	0	0	0.333333	0	0	0	0	0	1.66667	1.66667	0	0	0	0	p__Ascomycota	g__unclassified_p__Ascomycota	-	-
OTU2014	0	0	0	0	0	0	0	0.333333	0.666667	1.66667	1	0	0	0	p__unclassified_k__Fungi	g__unclassified_k__Fungi	-	-
OTU839	0	0	0	1.66667	0	0	2	0	0	0	0	0	0	0	p__unclassified_k__Fungi	g__unclassified_k__Fungi	-	-
OTU1687	0	0	0	0	2	0	0	0	0	0	0	0	0	1.66667	p__unclassified_k__Fungi	g__unclassified_k__Fungi	-	-
OTU1111	0	0	0	0	0	0	0	0	0	3.66667	0	0	0	0	p__Ascomycota	g__Myrothecium	Saprotroph	Undefined Saprotroph
OTU1295	0	0	0	0	0	0	0	0	0	3.66667	0	0	0	0	p__Basidiomycota	g__Coprinellus	Saprotroph	Dung Saprotroph-Plant Saprotroph-Wood Saprotroph
OTU1371	0	0	0	0	0	0	0	0	0	0	3.66667	0	0	0	p__Zygomycota	g__Mortierella	Saprotroph-Symbiotroph	Endophyte-Litter Saprotroph-Soil Saprotroph-Undefined Saprotroph
OTU1727	0	0	0	0	0	0	0	0	0	0	0	0	0	3.66667	p__Basidiomycota	g__unclassified_f__Thelephoraceae	Saprotroph-Symbiotroph	Ectomycorrhizal-Undefined Saprotroph
OTU1767	0	2.66667	0	0	0	0	0	0	0	0	0	0	0	1	p__Ascomycota	g__Trimmatostroma	Pathotroph	Lichen Parasite
OTU244	0	0	0	3.66667	0	0	0	0	0	0	0	0	0	0	p__Ascomycota	g__Colletotrichum	Pathotroph-Symbiotroph	Endophyte-Plant Pathogen
OTU293	0	0	0	2.66667	1	0	0	0	0	0	0	0	0	0	p__Ascomycota	g__Curvularia	Pathotroph	Plant Pathogen
OTU466	0	0	0	0	0	3.66667	0	0	0	0	0	0	0	0	p__Zygomycota	g__Ramicandelaber	Saprotroph	Undefined Saprotroph
OTU480	0	0	0	0	0	3.66667	0	0	0	0	0	0	0	0	p__Basidiomycota	g__unclassified_f__Pleurotaceae	Pathotroph-Saprotroph	Endophyte-Plant Pathogen-Wood Saprotroph
OTU60	0	3.66667	0	0	0	0	0	0	0	0	0	0	0	0	p__Ascomycota	g__Chaetomium	Pathotroph-Saprotroph-Symbiotroph	Animal Pathogen-Dung Saprotroph-Endophyte-Epiphyte-Plant Saprotroph-Wood Saprotroph
OTU1232	0	0	0	0	0	0	0	0	0	3.66667	0	0	0	0	p__Ascomycota	g__unclassified_p__Ascomycota	-	-
OTU767	3.66667	0	0	0	0	0	0	0	0	0	0	0	0	0	p__Ascomycota	g__unclassified_p__Ascomycota	-	-
OTU1955	0	0	0	0	0	0	0	3.66667	0	0	0	0	0	0	p__unclassified_k__Fungi	g__unclassified_k__Fungi	-	-
OTU61	0	3.66667	0	0	0	0	0	0	0	0	0	0	0	0	p__unclassified_k__Fungi	g__unclassified_k__Fungi	-	-
OTU537	0	0	0	0	0	3.66667	0	0	0	0	0	0	0	0	p__unclassified_k__Fungi	g__unclassified_k__Fungi	-	-
OTU832	0	0	0	0	0	0	3.66667	0	0	0	0	0	0	0	p__Ascomycota	g__unclassified_p__Ascomycota	-	-
OTU1497	0	0	0	0	0	0	0	0	0	0	0.666667	0.333333	0	2.66667	p__unclassified_k__Fungi	g__unclassified_k__Fungi	-	-
OTU1944	0	0	0	0	0	0	0	0	0	0	0	0	0	3.66667	p__unclassified_k__Fungi	g__unclassified_k__Fungi	-	-
OTU111	0	3.66667	0	0	0	0	0	0	0	0	0	0	0	0	p__Ascomycota	g__unclassified_p__Ascomycota	-	-
OTU660	3.66667	0	0	0	0	0	0	0	0	0	0	0	0	0	p__unclassified_k__Fungi	g__unclassified_k__Fungi	-	-
OTU1341	0	0	0	0	0	0	1.66667	0	0	0	0.666667	1.33333	0	0	p__Ascomycota	g__Spiromastix	Saprotroph	Undefined Saprotroph
OTU1684	0	0	0	0	0	0	0	0	0	0	1.66667	0.666667	0	1.33333	p__Ascomycota	g__unclassified_o__Hypocreales	Saprotroph	Undefined Saprotroph
OTU1316	0.666667	0	0	1	0	0	0	0	0	2	0	0	0	0	p__unclassified_k__Fungi	g__unclassified_k__Fungi	-	-
OTU834	0	0	0	0	0	0	3	0.666667	0	0	0	0	0	0	p__unclassified_k__Fungi	g__unclassified_k__Fungi	-	-
OTU1576	0	0	0	0	0	0	0	0	0	0.666667	0	0	3	0	p__Ascomycota	g__unclassified_p__Ascomycota	-	-
OTU186	0	0	0.333333	0	0	0.333333	0	3	0	0	0	0	0	0	p__Ascomycota	g__Microascus	Pathotroph-Saprotroph-Symbiotroph	Animal Pathogen-Endophyte-Plant Pathogen-Undefined Saprotroph
OTU221	0.666667	0	0	0.666667	0	0	0	0	0	2.33333	0	0	0	0	p__Ascomycota	g__Scytalidium	Saprotroph	Wood Saprotroph
OTU1893	0	0	0	0	0	0.333333	0	3.33333	0	0	0	0	0	0	p__Ascomycota	g__unclassified_f__Plectosphaerellaceae	Pathotroph-Saprotroph-Symbiotroph	Animal Pathogen-Endophyte-Fungal Parasite-Plant Pathogen=Wood Saprotroph
OTU198	0	0.333333	0	3.33333	0	0	0	0	0	0	0	0	0	0	p__Ascomycota	g__Schizothecium	Saprotroph	Dung Saprotroph
OTU393	0	0	0	0	3.33333	0	0	0	0	0	0.333333	0	0	0	p__Glomeromycota	g__Septoglomus	Symbiotroph	Arbuscular Mycorrhizal
OTU609	0	0.333333	0	0	1	2.33333	0	0	0	0	0	0	0	0	p__unclassified_k__Fungi	g__unclassified_k__Fungi	-	-
OTU526	0	0	0	0	0	3.33333	0	0.333333	0	0	0	0	0	0	p__unclassified_k__Fungi	g__unclassified_k__Fungi	-	-
OTU196	0	0	0.333333	3.33333	0	0	0	0	0	0	0	0	0	0	p__unclassified_k__Fungi	g__unclassified_k__Fungi	-	-
OTU919	0	0.333333	0.333333	0	0	0	0	2.33333	0.666667	0	0	0	0	0	p__Ascomycota	g__unclassified_c__Sordariomycetes	-	-
OTU437	0	0	0	1.33333	0.666667	0.333333	0	0	0	0	0	0	1.33333	0	p__Chytridiomycota	g__unclassified_c__Chytridiomycetes	-	-
OTU743	1.33333	0	0	0	0	0	0	0.333333	1.33333	0	0.666667	0	0	0	p__unclassified_k__Fungi	g__unclassified_k__Fungi	-	-
OTU1477	0	0	0	1.33333	0.333333	0	0	0	0	0	0.666667	1.33333	0	0	p__unclassified_k__Fungi	g__unclassified_k__Fungi	-	-
OTU17	0	0.666667	0	0	0.333333	0.666667	0	0	0	1.66667	0	0	0	0	p__Basidiomycota	g__Geastrum	Saprotroph	Undefined Saprotroph
OTU401	0	0	1	0	0.666667	1.66667	0	0	0	0	0	0	0	0	p__unclassified_k__Fungi	g__unclassified_k__Fungi	-	-
OTU1062	0	0	0	0	0.666667	0	0	0	2.66667	0	0	0	0	0	p__Basidiomycota	g__Conocybe	Saprotroph	Undefined Saprotroph
OTU1029	0.333333	0	0	0	0	0	0	0	1.66667	0.666667	0.333333	0	0.333333	0	p__Ascomycota	g__unclassified_p__Ascomycota	-	-
OTU1229	0	0	0	0	0.333333	0	0	0	0.333333	2.66667	0	0	0	0	p__Basidiomycota	g__Lentinellus	Saprotroph	Undefined Saprotroph
OTU1368	0	0	0.333333	0	0	2.66667	0	0	0	0	0.333333	0	0	0	p__Ascomycota	g__Pyrenochaeta	Saprotroph	Undefined Saprotroph-Wood Saprotroph
OTU263	0	0.666667	0	1	0	0	0	0.666667	0	0	0	0	0	1	p__Ascomycota	g__Colletotrichum	Pathotroph-Symbiotroph	Endophyte-Plant Pathogen
OTU447	0	0.666667	0	0	0.666667	0	0	0	0	2	0	0	0	0	p__Ascomycota	g__Gibberella	Pathotroph	Plant Pathogen
OTU106	0	3	0	0	0.333333	0	0	0	0	0	0	0	0	0	p__Ascomycota	g__Magnaporthiopsis	Pathotroph	Plant Pathogen
OTU1112	0	0	0	0	0.333333	0	0	0	0	3	0	0	0	0	p__Ascomycota	g__unclassified_f__Lasiosphaeriaceae	Saprotroph	Undefined Saprotroph
OTU1317	0	0	0	0	0	0	0	0	0	3	0	0	0.333333	0	p__Ascomycota	g__Sarcinomyces	-	-
OTU1630	0	0	0	0	0	0.333333	0	0	0	0	0	0	3	0	p__unclassified_k__Fungi	g__unclassified_k__Fungi	-	-
OTU1065	0	0.666667	0	0	0	0	0	0	2	0.333333	0.333333	0	0	0	p__unclassified_k__Fungi	g__unclassified_k__Fungi	-	-
OTU1771	0	0	0	0	0.333333	0	0	0	0	0	0	0	0	3	p__unclassified_k__Fungi	g__unclassified_k__Fungi	-	-
OTU1042	0	0	0	0	0	0	0	0	3.33333	0	0	0	0	0	p__Ascomycota	g__Hansfordia	Saprotroph	Undefined Saprotroph
OTU1206	0	0	0	0	0	0	0	0	0	3.33333	0	0	0	0	p__Ascomycota	g__Montagnula	Saprotroph	Undefined Saprotroph
OTU1212	0	0	0	0	0	0	0	0	0	3.33333	0	0	0	0	p__Basidiomycota	g__Geminibasidium	Saprotroph	Undefined Saprotroph
OTU1236	0	0	0	0	0	0	0	0	0	3.33333	0	0	0	0	p__Ascomycota	g__Lophiostoma	Saprotroph	Undefined Saprotroph
OTU1855	0	0	0	0	0	0	0	3.33333	0	0	0	0	0	0	p__Ascomycota	g__Acremonium	Pathogen-Saprotroph-Symbiotroph	Animal Pathogen-Endophyte-Fungal Parasite-Plant Pathogen-Wood Saprotroph
OTU225	0	0	0	3.33333	0	0	0	0	0	0	0	0	0	0	p__Basidiomycota	g__Tomentella	Symbiotroph	Ectomycorrhizal
OTU238	0	0	0	3.33333	0	0	0	0	0	0	0	0	0	0	p__Ascomycota	g__Metarhizium	Pathotroph	Animal Pathogen
OTU267	0	0	0	3.33333	0	0	0	0	0	0	0	0	0	0	p__Ascomycota	g__Roussoella	Saprotroph	Undefined Saprotroph
OTU309	0	0	0	3.33333	0	0	0	0	0	0	0	0	0	0	p__Zygomycota	g__Ramicandelaber	Saprotroph	Undefined Saprotroph
OTU321	0	0	0	3.33333	0	0	0	0	0	0	0	0	0	0	p__Ascomycota	g__Cyphellophora	Pathotroph-Symbiotroph	Epiphyte-Plant Pathogen
OTU464	0	0	0	0	0	3.33333	0	0	0	0	0	0	0	0	p__Ascomycota	g__unclassified_f__Sporormiaceae	Saprotroph	Dung Saprotroph-Plant Saprotroph
OTU511	0	0	0	0	0	3.33333	0	0	0	0	0	0	0	0	p__Ascomycota	g__Chaetomium	Pathotroph-Saprotroph-Symbiotroph	Animal Pathogen-Dung Saprotroph-Endophyte-Epiphyte-Plant Saprotroph-Wood Saprotroph
OTU544	0	0	0	0	0	3.33333	0	0	0	0	0	0	0	0	p__Ascomycota	g__Hypocrea	Pathotroph	Endophyte-Fungal Parasite
OTU557	0	0	0	0	0	3.33333	0	0	0	0	0	0	0	0	p__Ascomycota	g__Claviceps	Pathotroph	Plant Pathogen
OTU732	3.33333	0	0	0	0	0	0	0	0	0	0	0	0	0	p__Ascomycota	g__Coniothyrium	Pathotroph-Saprotroph	Plant Pathogen-Wood Saprotroph
OTU787	0	0	0	0	0	0	2.33333	0	0	1	0	0	0	0	p__Ascomycota	g__Aspergillus	Saprotroph	Undefined Saprotroph
OTU849	0	0	0	0	0	0	3.33333	0	0	0	0	0	0	0	p__Ascomycota	g__unclassified_p__Ascomycota	-	-
OTU1581	0	0	0	0	0	0	0	0	0	0	0	0	3.33333	0	p__unclassified_k__Fungi	g__unclassified_k__Fungi	-	-
OTU981	0	0	0	0	0	0	0	1	0	2.33333	0	0	0	0	p__Ascomycota	g__unclassified_o__Xylariales	-	-
OTU533	0	0	0	0	0	3.33333	0	0	0	0	0	0	0	0	p__Ascomycota	g__unclassified_p__Ascomycota	-	-
OTU1591	0	0	0	0	0	0	0	0	0	0	0	0	3.33333	0	p__Ascomycota	g__unclassified_p__Ascomycota	-	-
OTU1305	0	0	0	0	0	0	0	0	0	3.33333	0	0	0	0	p__Ascomycota	g__unclassified_o__Pleosporales	-	-
OTU1977	0	0	0	0	0	0	0	0.666667	0	0	0.333333	0	0	2.33333	p__unclassified_k__Fungi	g__unclassified_k__Fungi	-	-
OTU570	0	0	0	0	0	3.33333	0	0	0	0	0	0	0	0	p__unclassified_k__Fungi	g__unclassified_k__Fungi	-	-
OTU1307	0	0	0	0	0	0	0	0	0	3.33333	0	0	0	0	p__Ascomycota	g__unclassified_o__Sordariales	-	-
OTU1114	0	0	0	0	0	0	0	0	0	3.33333	0	0	0	0	p__Ascomycota	g__Setomelanomma	-	-
OTU1543	0	0	0	0	0	0	0	0	0	0	0	0	3.33333	0	p__unclassified_k__Fungi	g__unclassified_k__Fungi	-	-
OTU488	0	0	0	0	0	3.33333	0	0	0	0	0	0	0	0	p__unclassified_k__Fungi	g__unclassified_k__Fungi	-	-
OTU1450	0	0	0	0	0	0	0	0	0	0	0	3.33333	0	0	p__unclassified_k__Fungi	g__unclassified_k__Fungi	-	-
OTU810	0	0	0	0	0	0	3.33333	0	0	0	0	0	0	0	p__unclassified_k__Fungi	g__unclassified_k__Fungi	-	-
OTU1723	0	0	0	0.666667	0	0.333333	0	0	0	0	1	0	0	1.33333	p__unclassified_k__Fungi	g__unclassified_k__Fungi	-	-
OTU1798	0	0	1.33333	2	0	0	0	0	0	0	0	0	0	0	p__Ascomycota	g__unclassified_p__Ascomycota	-	-
OTU522	0	0.333333	0	0	0	2.33333	0	0	0.333333	0	0	0	0	0.333333	p__unclassified_k__Fungi	g__unclassified_k__Fungi	-	-
OTU47	0.666667	1.66667	0	0	0	0	0	0	0	0	0	0.666667	0	0	p__Basidiomycota	g__Occultifur	-	-
OTU1702	0	0	0	0.333333	0	0	0	0	0	1	0	0	0	1.66667	p__Ascomycota	g__unclassified_o__Pleosporales	-	-
OTU1123	0	0	0	0	0.333333	0	0	0	0	2.66667	0	0	0	0	p__Ascomycota	g__unclassified_f__Phaeosphaeriaceae	Pathotroph-Saprotroph	Fungal Parasite-Plant Pathogen-Plant Saprotroph
OTU1607	0	0	0	0.333333	0	0	0	0	0	0	0	0	2.66667	0	p__Ascomycota	g__unclassified_f__Microascaceae	Pathotroph-Saprotroph-Symbiotroph	Animal Pathogen-Endophyte-Plant Pathogen-Undefined Saprotroph
OTU757	2.66667	0	0	0	0	0.333333	0	0	0	0	0	0	0	0	p__unclassified_k__Fungi	g__unclassified_k__Fungi	-	-
OTU237	0	0	0.333333	2.66667	0	0	0	0	0	0	0	0	0	0	p__unclassified_k__Fungi	g__unclassified_k__Fungi	-	-
OTU1696	0	0	0	0	0	0	0	0	0	0.333333	0	0	0	2.66667	p__unclassified_k__Fungi	g__unclassified_k__Fungi	-	-
OTU287	0	0	0.333333	2.66667	0	0	0	0	0	0	0	0	0	0	p__Ascomycota	g__unclassified_p__Ascomycota	-	-
OTU1119	0.333333	0.333333	0.333333	0	0.333333	0	0	0	0	1.66667	0	0	0	0	p__Ascomycota	g__Aspergillus	Saprotroph	Undefined Saprotroph
OTU596	0	0.666667	0.333333	0	0	0.666667	0	0	0	0	0	0.666667	0.666667	0	p__Ascomycota	g__unclassified_o__norank_c__Leotiomycetes	-	-
OTU1012	0	0	0	0	0	0	0	0	3	0	0	0	0	0	p__Ascomycota	g__Acremonium	Pathogen-Saprotroph-Symbiotroph	Animal Pathogen-Endophyte-Fungal Parasite-Plant Pathogen-Wood Saprotroph
OTU1261	0	0	0	0	0	0	0	1	0	2	0	0	0	0	p__Basidiomycota	g__Phanerochaete	Saprotroph	Wood Saprotroph
OTU1417	0	0	0	0	0	0	0	0	0	0	3	0	0	0	p__Zygomycota	g__Mortierella	Saprotroph-Symbiotroph	Endophyte-Litter Saprotroph-Soil Saprotroph-Undefined Saprotroph
OTU1900	0	0	0	0	0	0	0	0	3	0	0	0	0	0	p__Ascomycota	g__unclassified_f__Microascaceae	Pathotroph-Saprotroph-Symbiotroph	Animal Pathogen-Endophyte-Plant Pathogen-Undefined Saprotroph
OTU1967	0	0	0	0	0	0	0	1.33333	0	0	0	0	0	1.66667	p__Ascomycota	g__Emericella	Saprotroph	Undefined Saprotroph
OTU618	0	0	0	0	0	3	0	0	0	0	0	0	0	0	p__Basidiomycota	g__Entoloma	Pathotroph-Saprotroph-Symbiotroph	Ectomycorrhizal-Fungal Parasite-Soil Saprotroph-Undefined Saprotroph
OTU644	0	0	0	0	0	3	0	0	0	0	0	0	0	0	p__Ascomycota	g__unclassified_f__Lasiosphaeriaceae	Saprotroph	Undefined Saprotroph
OTU654	0.666667	1	0	1	0	0	0	0.333333	0	0	0	0	0	0	p__Ascomycota	g__unclassified_f__Halosphaeriaceae	Saprotroph	Undefined Saprotroph-Wood Saprotroph
OTU737	3	0	0	0	0	0	0	0	0	0	0	0	0	0	p__Ascomycota	g__unclassified_f__Magnaporthaceae	Pathotroph	Plant Pathogen
OTU950	0	0	0	0	0	0	0	2	0	1	0	0	0	0	p__Basidiomycota	g__Rhodotorula	Pathotroph-Saprotroph	Animal Endosymbiont-Animal Pathogen-Endophyte-Plant Pathogen-Undefined Saprotroph
OTU378	0	0	0	0	3	0	0	0	0	0	0	0	0	0	p__Ascomycota	g__unclassified_o__Sordariales	-	-
OTU1133	0	0	0	0	0	0	0	0	0	3	0	0	0	0	p__unclassified_k__Fungi	g__unclassified_k__Fungi	-	-
OTU1660	0	0	0	0	0	0	0	0	0	0	0	0	3	0	p__unclassified_k__Fungi	g__unclassified_k__Fungi	-	-
OTU478	1.66667	0	0	0	0	1.33333	0	0	0	0	0	0	0	0	p__unclassified_k__Fungi	g__unclassified_k__Fungi	-	-
OTU1698	0	0	0	0	0	0	0	0	0	0	0	0	0	3	p__Ascomycota	g__unclassified_p__Ascomycota	-	-
OTU1217	0	0	0	0.666667	0	2	0	0	0	0.333333	0	0	0	0	p__Ascomycota	g__unclassified_c__Sordariomycetes	-	-
OTU1379	0	0	0	0	0	0	0	0	0	0	3	0	0	0	p__unclassified_k__Fungi	g__unclassified_k__Fungi	-	-
OTU472	0	0	0	0	0	3	0	0	0	0	0	0	0	0	p__Ascomycota	g__unclassified_p__Ascomycota	-	-
OTU1238	0	0	0	0	0	0	0	0	0	3	0	0	0	0	p__unclassified_k__Fungi	g__unclassified_k__Fungi	-	-
OTU195	0	0.666667	0	0.333333	0	2	0	0	0	0	0	0	0	0	p__unclassified_k__Fungi	g__unclassified_k__Fungi	-	-
OTU1777	0	0	0	0	0	0	0	0	0	0	0	0	0	3	p__Ascomycota	g__unclassified_p__Ascomycota	-	-
OTU615	0	0	0	0	0	3	0	0	0	0	0	0	0	0	p__unclassified_k__Fungi	g__unclassified_k__Fungi	-	-
OTU81	0	2	0	0.333333	0	0	0	0.333333	0.333333	0	0	0	0	0	p__unclassified_k__Fungi	g__unclassified_k__Fungi	-	-
OTU648	0.333333	0	0	0	0.666667	0	0	0	0.333333	0	0.333333	1	0	0.333333	p__unclassified_k__Fungi	g__unclassified_k__Fungi	-	-
OTU1882	0	0	0.333333	0.333333	0.666667	0.333333	0	0	0	0	1	0	0.333333	0	p__unclassified_k__Fungi	g__unclassified_k__Fungi	-	-
OTU1005	0	0	0	0	0.666667	0	0	0	2.33333	0	0	0	0	0	p__unclassified_k__Fungi	g__unclassified_k__Fungi	-	-
OTU1509	0	0	0	0	0	0.666667	0	0	0	0	0	2.33333	0	0	p__Ascomycota	g__unclassified_c__Sordariomycetes	-	-
OTU444	0	0.666667	0	0	1.33333	0	0	0	0.333333	0	0.666667	0	0	0	p__unclassified_k__Fungi	g__unclassified_k__Fungi	-	-
OTU246	0	0	0	2.33333	0	0	0	0	0.666667	0	0	0	0	0	p__unclassified_k__Fungi	g__unclassified_k__Fungi	-	-
OTU1234	0.333333	0.333333	0	0	0	0	0	0	0	2.33333	0	0	0	0	p__Basidiomycota	g__Sporobolomyces	Pathotroph-Saprotroph	Fungal Parasite-Litter Saprotroph
OTU1521	0	0	0	0	0	2.33333	0	0.333333	0	0	0	0.333333	0	0	p__unclassified_k__Fungi	g__unclassified_k__Fungi	-	-
OTU333	0.333333	0	0.333333	2.33333	0	0	0	0	0	0	0	0	0	0	p__unclassified_k__Fungi	g__unclassified_k__Fungi	-	-
OTU738	2.33333	0	0	0	0	0	0	0.333333	0.333333	0	0	0	0	0	p__Ascomycota	g__unclassified_c__Sordariomycetes	-	-
OTU130	0.666667	0.333333	0	0	0	0	0	0	1.66667	0	0	0	0	0	p__Ascomycota	g__Talaromyces	Saprotroph	Undefined Saprotroph
OTU240	0	0.666667	0	1.66667	0	0	0	0	0.333333	0	0	0	0	0	p__Zygomycota	g__Actinomucor	Saprotroph	Undefined Saprotroph
OTU870	0	0	0	0	0.333333	0	0	1.66667	0	0.666667	0	0	0	0	p__Basidiomycota	g__Peniophora	Pathotroph-Saprotroph	Plant Pathogen-Wood Saprotroph
OTU979	0	0	0	0	0	0	0	1.66667	0	1	0	0	0	0	p__Ascomycota	g__Leptosphaeria	Pathotroph	Plant Pathogen
OTU1345	0.666667	0	0	0	0.333333	0	0	0	0	0	1.66667	0	0	0	p__unclassified_k__Fungi	g__unclassified_k__Fungi	-	-
OTU1624	0	0	0	0	0	0	0	0	0.333333	0	0	0	0.666667	1.66667	p__Ascomycota	g__unclassified_p__Ascomycota	-	-
OTU1328	0	0	0	0	0.333333	0	0	0	0	0	0.666667	0	0	1.66667	p__unclassified_k__Fungi	g__unclassified_k__Fungi	-	-
OTU85	0	1.66667	0	0	0	0	0	1	0	0	0	0	0	0	p__unclassified_k__Fungi	g__unclassified_k__Fungi	-	-
OTU1322	0	0	0	0	0	0	0	0	0	0	1.66667	1	0	0	p__Ascomycota	g__unclassified_p__Ascomycota	-	-
OTU1349	0	0	0	0.666667	0	0	0	0	0	0	1.66667	0.333333	0	0	p__unclassified_k__Fungi	g__unclassified_k__Fungi	-	-
OTU122	0	1	0	1.66667	0	0	0	0	0	0	0	0	0	0	p__Ascomycota	g__unclassified_c__Sordariomycetes	-	-
OTU1262	0	0	0	0	0	0	0	0	0	2.66667	0	0	0	0	p__Ascomycota	g__unclassified_f__Pezizaceae	Saprotroph-Symbiotroph	Dung Saprotroph-Ectomycorrhizal-Litter Saprotroph-Undefined Saprotroph
OTU1704	0	0	0	0	0	0	0	0	0	0	0	0	0	2.66667	p__Ascomycota	g__Monosporascus	Pathotroph	Plant Pathogen
OTU188	0	0	2.66667	0	0	0	0	0	0	0	0	0	0	0	p__Basidiomycota	g__Postia	Saprotroph	Wood Saprotroph
OTU468	0	0	0	0	0	2.66667	0	0	0	0	0	0	0	0	p__Basidiomycota	g__Lepiota	Saprotroph	Soil Saprotroph
OTU574	0	0	0	0	0	2.66667	0	0	0	0	0	0	0	0	p__Zygomycota	g__Ramicandelaber	Saprotroph	Undefined Saprotroph
OTU627	0	0	0	0	0	2.66667	0	0	0	0	0	0	0	0	p__Ascomycota	g__unclassified_f__Sporormiaceae	Saprotroph	Dung Saprotroph-Plant Saprotroph
OTU687	2.66667	0	0	0	0	0	0	0	0	0	0	0	0	0	p__Basidiomycota	g__Geminibasidium	Saprotroph	Undefined Saprotroph
OTU846	0	0	0	0	0	0	2.66667	0	0	0	0	0	0	0	p__Ascomycota	g__Curvularia	Pathotroph	Plant Pathogen
OTU906	0	0	0	0	0	0	0	2.66667	0	0	0	0	0	0	p__Ascomycota	g__Microascus	Pathotroph-Saprotroph-Symbiotroph	Animal Pathogen-Endophyte-Plant Pathogen-Undefined Saprotroph
OTU922	0	0	0	0	0	0	0	2.66667	0	0	0	0	0	0	p__Ascomycota	g__Lophiostoma	Saprotroph	Undefined Saprotroph
OTU947	0	0	0	0	0	0	0	2.66667	0	0	0	0	0	0	p__Ascomycota	g__unclassified_o__Hypocreales	Saprotroph	Undefined Saprotroph
OTU1688	0	0	0	0	0	0	0	0	0	0	0	0	0	2.66667	p__unclassified_k__Fungi	g__unclassified_k__Fungi	-	-
OTU1188	0	0	0	0	0	0	0	0	0	2.66667	0	0	0	0	p__unclassified_k__Fungi	g__unclassified_k__Fungi	-	-
OTU191	0	0	2.66667	0	0	0	0	0	0	0	0	0	0	0	p__Ascomycota	g__unclassified_o__Coniochaetales	-	-
OTU578	0	0	0	0	0	2.66667	0	0	0	0	0	0	0	0	p__unclassified_k__Fungi	g__unclassified_k__Fungi	-	-
OTU1518	0	0	0	0	0	0	0	0	0	0	0	2.66667	0	0	p__unclassified_k__Fungi	g__unclassified_k__Fungi	-	-
OTU594	0	0	0	0	0	2.66667	0	0	0	0	0	0	0	0	p__Ascomycota	g__unclassified_p__Ascomycota	-	-
OTU1208	0	0	0	0	0	0	0	0	0	2.66667	0	0	0	0	p__Ascomycota	g__unclassified_p__Ascomycota	-	-
OTU304	0	0	0	2.66667	0	0	0	0	0	0	0	0	0	0	p__unclassified_k__Fungi	g__unclassified_k__Fungi	-	-
OTU1724	0	0	0	0	0	0	0	0	0	0	0	0	0	2.66667	p__unclassified_k__Fungi	g__unclassified_k__Fungi	-	-
OTU1710	0.333333	0	0	0	0	0	0	0	0	0	0.333333	0	0.333333	1.66667	p__Ascomycota	g__unclassified_p__Ascomycota	-	-
OTU1231	0	2	0	0	0	0	0	0	0	0.666667	0	0	0	0	p__Ascomycota	g__Scedosporium	Saprotroph	Undefined Saprotroph
OTU179	0	0	0.333333	0	0.666667	0	0	0	1	0	0.666667	0	0	0	p__Ascomycota	g__Fusidium	Saprotroph	Undefined Saprotroph
OTU1878	1	0	0	0	0	0.333333	0	0	0.666667	0	0	0.666667	0	0	p__Ascomycota	g__unclassified_f__Microascaceae	Pathotroph-Saprotroph-Symbiotroph	Animal Pathogen-Endophyte-Plant Pathogen-Undefined Saprotroph
OTU961	0	0	0	0	0	0	0	0.666667	0	2	0	0	0	0	p__Basidiomycota	g__Perenniporia	Saprotroph	Wood Saprotroph
OTU763	2	0	0	0	0	0	0	0	0	0	0.666667	0	0	0	p__unclassified_k__Fungi	g__unclassified_k__Fungi	-	-
OTU1768	0	0.666667	0	0	0	0	0	0	0	0	0	0	0	2	p__unclassified_k__Fungi	g__unclassified_k__Fungi	-	-
OTU1623	0	0	0	0	0	0.666667	0	0	0	0	0	0	2	0	p__unclassified_k__Fungi	g__unclassified_k__Fungi	-	-
OTU103	0	2	0	0	0	0	0	0	0	0	0	0.666667	0	0	p__unclassified_k__Fungi	g__unclassified_k__Fungi	-	-
OTU1374	0.666667	1	0	0	0	0	0	0	0	0	0.666667	0.333333	0	0	p__Ascomycota	g__unclassified_p__Ascomycota	-	-
OTU218	0	0	0	2	0.333333	0	0	0	0	0	0	0	0	0.333333	p__Zygomycota	g__Mortierella	Saprotroph-Symbiotroph	Endophyte-Litter Saprotroph-Soil Saprotroph-Undefined Saprotroph
OTU486	0.333333	0	0	0	0	0.333333	0	0	0	0	0	0	2	0	p__Ascomycota	g__unclassified_c__Sordariomycetes	-	-
OTU1990	0	0	0	0	0	0	2.33333	0.333333	0	0	0	0	0	0	p__Ascomycota	g__Spiromastix	Saprotroph	Undefined Saprotroph
OTU920	0	0	0	0.333333	0	0.333333	0	1.33333	0.666667	0	0	0	0	0	p__Ascomycota	g__Acremonium	Pathogen-Saprotroph-Symbiotroph	Animal Pathogen-Endophyte-Fungal Parasite-Plant Pathogen-Wood Saprotroph
OTU1425	0	0	0	0.333333	0	0	0	0	0	0	2.33333	0	0	0	p__unclassified_k__Fungi	g__unclassified_k__Fungi	-	-
OTU1947	2.33333	0	0	0	0	0	0	0	0	0	0	0.333333	0	0	p__Ascomycota	g__unclassified_p__Ascomycota	-	-
OTU1736	0.333333	0	0	0	0	0	0	0	0	0	0	0	0	2.33333	p__unclassified_k__Fungi	g__unclassified_k__Fungi	-	-
OTU356	0.333333	0.666667	0	1.33333	0	0	0	0.333333	0	0	0	0	0	0	p__Ascomycota	g__Periconia	Pathotroph-Saprotroph-Symbiotroph	Endophyte-Plant Pathogen-Wood Saprotroph
OTU419	0	0	0	0	0.333333	0	0	1.33333	0	1	0	0	0	0	p__Ascomycota	g__Acremonium	Pathogen-Saprotroph-Symbiotroph	Animal Pathogen-Endophyte-Fungal Parasite-Plant Pathogen-Wood Saprotroph
OTU657	1	0	0	0	0	0	0	1.33333	0	0	0	0	0.333333	0	p__Ascomycota	g__Chaetomium	Pathotroph-Saprotroph-Symbiotroph	Animal Pathogen-Dung Saprotroph-Endophyte-Epiphyte-Plant Saprotroph-Wood Saprotroph
OTU1536	0	0	0	0	0	0	0	0.333333	1.33333	0	0	1	0	0	p__unclassified_k__Fungi	g__unclassified_k__Fungi	-	-
OTU1896	0	0	0	0	0	1	0	0.333333	0	0	0	1.33333	0	0	p__unclassified_k__Fungi	g__unclassified_k__Fungi	-	-
OTU1609	0	0.333333	0	0	0	0	0	0.666667	0	0	0	0	0.333333	1.33333	p__Ascomycota	g__unclassified_p__Ascomycota	-	-
OTU995	1.33333	0.333333	0	0	0	0	0	0.333333	0	0	0.333333	0.333333	0	0	p__unclassified_k__Fungi	g__unclassified_k__Fungi	-	-
OTU403	0	1.33333	0	0	1.33333	0	0	0	0	0	0	0	0	0	p__Ascomycota	g__Kabatiella	Pathotroph-Saprotroph-Symbiotroph	Endophyte-Plant Pathogen-Undefined Saprotroph
OTU1998	0	1.33333	0	0	0	0	0	0	0	0	0	0	0	1.33333	p__unclassified_k__Fungi	g__unclassified_k__Fungi	-	-
OTU911	0	0	0	0	0	0	0	1.33333	0	0	0	0	1.33333	0	p__unclassified_k__Fungi	g__unclassified_k__Fungi	-	-
OTU1116	0	0	0	0	0	0	0	0.666667	0	1.66667	0	0	0	0	p__Ascomycota	g__unclassified_f__Dermateaceae	Pathotroph-Saprotroph	Plant Pathogen-Plant Saprotroph
OTU512	0	0	0	1.66667	0	0.666667	0	0	0	0	0	0	0	0	p__Ascomycota	g__unclassified_p__Ascomycota	-	-
OTU671	1	0	0	0	0	0	0	0	0	0	0.666667	0.666667	0	0	p__Basidiomycota	g__Corticium	Saprotroph	Undefined Saprotroph
OTU1752	0	0	0	0	0	0	0	0.666667	1	0	0	0	0	0.666667	p__Ascomycota	g__unclassified_c__Sordariomycetes	-	-
OTU1918	1	0.666667	0	0	0	0	0	0	0	0	0	0	0.666667	0	p__unclassified_k__Fungi	g__unclassified_k__Fungi	-	-
OTU772	0.666667	0	0	0	1	0	0	0	0	0	0.666667	0	0	0	p__Ascomycota	g__unclassified_p__Ascomycota	-	-
OTU314	0	0	0	0.333333	0	0	0	0	0	0	0.666667	0.666667	0	0.666667	p__unclassified_k__Fungi	g__unclassified_k__Fungi	-	-
OTU1169	0	0	0	0	0.333333	0	0	0	0	2	0	0	0	0	p__Basidiomycota	g__Phlebia	Saprotroph	Wood Saprotroph
OTU1330	0	0	0	0	2	0	0	0	0	0	0.333333	0	0	0	p__Glomeromycota	g__unclassified_f__Glomeraceae	Symbiotroph	Arbuscular Mycorrhizal
OTU1446	0	0	0	2	0	0	0	0	0	0	0	0.333333	0	0	p__Basidiomycota	g__Pholiota	Saprotroph	Undefined Saprotroph
OTU1662	0	0	0	0	0	0	1	0	0.333333	0	0	0	1	0	p__Basidiomycota	g__Trichosporon	Pathotroph	Animal Pathogen
OTU1663	0	0	0	0	0	0	0	0	0	0.333333	0	0	0	2	p__Ascomycota	g__Ramichloridium	Pathotroph	Plant Pathogen
OTU224	0	0	0.333333	0.666667	0	1	0	0	0	0	0	0	0.333333	0	p__Ascomycota	g__Volutella	Pathotroph	Plant Pathogen
OTU268	0	0	0.333333	0.333333	0	0.666667	0	0.333333	0	0	0	0	0	0.666667	p__Ascomycota	g__Alternaria	Pathotroph-Saprotroph-Symbiotroph	Animal Pathogen-Endophyte-Plant Pathogen-Wood Saprotroph
OTU70	0	0.333333	0.666667	0.333333	0	0	0.333333	0	0.666667	0	0	0	0	0	p__Ascomycota	g__unclassified_o__Hypocreales	Saprotroph	Undefined Saprotroph
OTU706	2	0	0	0	0	0	0	0	0	0	0.333333	0	0	0	p__Ascomycota	g__Exophiala	Pathotroph-Saprotroph	Animal Pathogen-Undefined Saprotroph
OTU72	0	2	0	0	0	0	0	0.333333	0	0	0	0	0	0	p__Ascomycota	g__Sagenomella	Saprotroph	Undefined Saprotroph
OTU556	0	0	0	0	0	2	0	0	0	0	0	0.333333	0	0	p__unclassified_k__Fungi	g__unclassified_k__Fungi	-	-
OTU1445	0	0	0	0	0	0	0	0	0	0	2	0.333333	0	0	p__Ascomycota	g__unclassified_p__Ascomycota	-	-
OTU1214	0	0	0	0	2	0	0	0	0	0.333333	0	0	0	0	p__unclassified_k__Fungi	g__unclassified_k__Fungi	-	-
OTU680	2	0	0	0.333333	0	0	0	0	0	0	0	0	0	0	p__Ascomycota	g__unclassified_p__Ascomycota	-	-
OTU1551	0	0	0	0	0	1	0	0	0.333333	0	0	0	1	0	p__unclassified_k__Fungi	g__unclassified_k__Fungi	-	-
OTU877	0	0	0	0	0.666667	0	0	0.333333	0	0	0.333333	0	0	1	p__Ascomycota	g__unclassified_p__Ascomycota	-	-
OTU1413	1	0	0	0	0	0	0	0	0.333333	0	1	0	0	0	p__unclassified_k__Fungi	g__unclassified_k__Fungi	-	-
OTU1523	0	0	0	0	0	0.333333	0.666667	0	0	0	0	0.333333	1	0	p__unclassified_k__Fungi	g__unclassified_k__Fungi	-	-
OTU1423	0.333333	0	0.333333	0	0	0	0.333333	0	0.333333	0	0.666667	0	0	0.333333	p__Ascomycota	g__unclassified_o__Hypocreales	Saprotroph	Undefined Saprotroph
OTU637	0	0	0.333333	0.333333	0	0.666667	0	0.333333	0	0	0	0.333333	0.333333	0	p__unclassified_k__Fungi	g__unclassified_k__Fungi	-	-
OTU1163	0	0	0	0	0	0	0	0	0	2.33333	0	0	0	0	p__Basidiomycota	g__Agrocybe	Saprotroph	Dung Saprotroph-Soil Saprotroph-Undefined Saprotroph
OTU1222	0	0	0	0	0	0	0	0	0	2.33333	0	0	0	0	p__Basidiomycota	g__Irpex	Saprotroph	Wood Saprotroph
OTU1283	0	0	0	0	0	0	0	0	0	2.33333	0	0	0	0	p__Basidiomycota	g__Gloeocystidiellum	Saprotroph	Undefined Saprotroph
OTU1293	0	0	0	0	0	0	0	0	0	2.33333	0	0	0	0	p__Ascomycota	g__Phaeoisaria	Saprotroph	Undefined Saprotroph-Wood Saprotroph
OTU1410	0	0	0	0	0	0	0	0	0	0	2.33333	0	0	0	p__Ascomycota	g__unclassified_f__Sporormiaceae	Saprotroph	Dung Saprotroph-Plant Saprotroph
OTU1661	0	0	0	0	0	0	0	0	0	0	0	0	2.33333	0	p__Ascomycota	g__unclassified_f__Trichocomaceae	Saprotroph	Undefined Saprotroph
OTU1695	0	0	0	0	0	0	0	0	0	0	0	0	0	2.33333	p__Basidiomycota	g__Rhodosporidium	Saprotroph	Undefined Saprotroph
OTU1889	2.33333	0	0	0	0	0	0	0	0	0	0	0	0	0	p__Ascomycota	g__unclassified_f__Coniochaetaceae	Pathotroph-Saprotroph-Symbiotroph	Animal Pathogen-Dung Saprotroph-Endophyte-Lichen Parasite-Plant Pathogen-Undefined Saprotroph
OTU1942	0	0	0	0	0	0	0	2.33333	0	0	0	0	0	0	p__Basidiomycota	g__Geminibasidium	Saprotroph	Undefined Saprotroph
OTU2000	0	0	0	0	0	0	0	0	0	0	0	0	0	2.33333	p__Ascomycota	g__Madurella	Pathotroph	Animal Pathogen
OTU272	0	0	0	2.33333	0	0	0	0	0	0	0	0	0	0	p__Basidiomycota	g__Waitea	Pathotroph	Plant Pathogen
OTU295	0	0	0	2.33333	0	0	0	0	0	0	0	0	0	0	p__Zygomycota	g__Mortierella	Saprotroph-Symbiotroph	Endophyte-Litter Saprotroph-Soil Saprotroph-Undefined Saprotroph
OTU296	0	0	0	2.33333	0	0	0	0	0	0	0	0	0	0	p__Basidiomycota	g__Tomentella	Symbiotroph	Ectomycorrhizal
OTU395	0	0	0	0	2.33333	0	0	0	0	0	0	0	0	0	p__Ascomycota	g__Arthrinium	Saprotroph	Plant Saprotroph
OTU454	0	0	0	0	2.33333	0	0	0	0	0	0	0	0	0	p__Ascomycota	g__Neonectria	Pathotroph	Plant Pathogen
OTU479	0	0	0	0	0	2.33333	0	0	0	0	0	0	0	0	p__Ascomycota	g__Arthrinium	Saprotroph	Plant Saprotroph
OTU491	0	0	0	0	0	2.33333	0	0	0	0	0	0	0	0	p__Ascomycota	g__unclassified_f__Ceratostomataceae	Pathotroph-Saprotroph	Fungal Parasite-Plant Saprotroph-Soil Saprotroph
OTU777	0	0	0	0	0	0	2.33333	0	0	0	0	0	0	0	p__Ascomycota	g__Cordana	Pathotroph-Saprotroph	-
OTU815	0	0	0	0	0	0	2.33333	0	0	0	0	0	0	0	p__Ascomycota	g__Aspergillus	Saprotroph	Undefined Saprotroph
OTU1747	0	0	0	0	0	0	0	0	0	0	0	0	0	2.33333	p__unclassified_k__Fungi	g__unclassified_k__Fungi	-	-
OTU519	0	0	0	0	0	2.33333	0	0	0	0	0	0	0	0	p__unclassified_k__Fungi	g__unclassified_k__Fungi	-	-
OTU780	0	0	0	0	0	0	2.33333	0	0	0	0	0	0	0	p__unclassified_k__Fungi	g__unclassified_k__Fungi	-	-
OTU1023	0	0	0	0	0	0	0	0	2.33333	0	0	0	0	0	p__Zygomycota	g__unclassified_o__Mortierellales	-	-
OTU842	0	0	0	0	0	0	2.33333	0	0	0	0	0	0	0	p__unclassified_k__Fungi	g__unclassified_k__Fungi	-	-
OTU1667	0	0	0	0	0	0	0	0	0	0	0	0	0	2.33333	p__unclassified_k__Fungi	g__unclassified_k__Fungi	-	-
OTU1082	0	0	0	0	0	0	0	0	2.33333	0	0	0	0	0	p__unclassified_k__Fungi	g__unclassified_k__Fungi	-	-
OTU127	0	2.33333	0	0	0	0	0	0	0	0	0	0	0	0	p__unclassified_k__Fungi	g__unclassified_k__Fungi	-	-
OTU821	0	0	0	0	0	0	2.33333	0	0	0	0	0	0	0	p__Ascomycota	g__Myriodontium	-	-
OTU1	0	1.33333	0	0	0.666667	0	0	0	0.333333	0	0	0	0	0	p__unclassified_k__Fungi	g__unclassified_k__Fungi	-	-
OTU350	0	0	0	2.33333	0	0	0	0	0	0	0	0	0	0	p__unclassified_k__Fungi	g__unclassified_k__Fungi	-	-
OTU1475	0	0	0	0	0	0	0	0	0	0	0	2.33333	0	0	p__unclassified_k__Fungi	g__unclassified_k__Fungi	-	-
OTU1414	0	0	0	0	0	0	0	0	0	0	2.33333	0	0	0	p__Ascomycota	g__unclassified_p__Ascomycota	-	-
OTU288	0	0	0	2.33333	0	0	0	0	0	0	0	0	0	0	p__unclassified_k__Fungi	g__unclassified_k__Fungi	-	-
OTU936	0	0	0	0	0	0	0	2.33333	0	0	0	0	0	0	p__Ascomycota	g__unclassified_c__Sordariomycetes	-	-
OTU431	0	0	0	0	2.33333	0	0	0	0	0	0	0	0	0	p__unclassified_k__Fungi	g__unclassified_k__Fungi	-	-
OTU792	0	0	0	0	0	0	2.33333	0	0	0	0	0	0	0	p__unclassified_k__Fungi	g__unclassified_k__Fungi	-	-
OTU1461	0	0	0	0	1.33333	0	0	0	0	0	0	0.333333	0	0.666667	p__Ascomycota	g__unclassified_o__Hypocreales	Saprotroph	Undefined Saprotroph
OTU43	0	1.33333	0	0	0	1	0	0	0	0	0	0	0	0	p__Ascomycota	g__Sporormiella	Saprotroph	Undefined Saprotroph
OTU956	0	0	0	0	0.333333	0	0	0.666667	1.33333	0	0	0	0	0	p__Ascomycota	g__unclassified_f__Hyponectriaceae	Pathotroph-Saprotroph	Plant Pathogen-Undefined Saprotroph
OTU1658	0	0	0	0	0	0	0	0	0	0	0.666667	0.333333	1.33333	0	p__unclassified_k__Fungi	g__unclassified_k__Fungi	-	-
OTU996	0	0	0	1.33333	0	0	0	1	0	0	0	0	0	0	p__unclassified_k__Fungi	g__unclassified_k__Fungi	-	-
OTU299	0	0	0	1.33333	0	0	0	0.333333	0	0.666667	0	0	0	0	p__Ascomycota	g__unclassified_c__Eurotiomycetes	-	-
OTU1510	0	0	0	0	0	0	0	0.333333	0	0	0	1.66667	0	0	p__Ascomycota	g__Penicillium	Saprotroph	Undefined Saprotroph
OTU1590	0	0.333333	0	0	0	0	0	0	0	0	0	0	1.66667	0	p__Ascomycota	g__Torula	Pathotroph-Saprotroph	Endophyte-Plant Pathogen-Wood Saprotroph
OTU1778	0	0	0	0	0	0	0	0.333333	0	0	0	0	0	1.66667	p__Ascomycota	g__Exserohilum	Pathotroph	Plant Pathogen
OTU1933	1.66667	0	0	0	0	0	0	0	0	0	0	0	0.333333	0	p__Ascomycota	g__unclassified_f__Gymnoascaceae	Saprotroph	Dung Saprotroph-Plant Saprotroph
OTU194	0.333333	0	0	1.66667	0	0	0	0	0	0	0	0	0	0	p__Ascomycota	g__unclassified_c__Sordariomycetes	-	-
OTU1656	0	0	0	0	0.333333	0	0	0	0	0	0	0	1.66667	0	p__unclassified_k__Fungi	g__unclassified_k__Fungi	-	-
OTU769	0.333333	0	0	1.66667	0	0	0	0	0	0	0	0	0	0	p__unclassified_k__Fungi	g__unclassified_k__Fungi	-	-
OTU1333	0	0.333333	0	0	0	0	0	0	0	0	1.66667	0	0	0	p__Ascomycota	g__unclassified_p__Ascomycota	-	-
OTU1184	0	0	0	0	0.333333	0	0	0	0	1.66667	0	0	0	0	p__Basidiomycota	g__unclassified_f__norank_o__Agaricales	-	-
OTU1471	0	0	0	0	0	0	0	0	0.666667	0.666667	0	0.666667	0	0	p__Ascomycota	g__Gibellulopsis	Pathotroph	Plant Pathogen
OTU1146	0	0	0	0	0	0	0	0	0	2	0	0	0	0	p__Ascomycota	g__Brachyphoris	Saprotroph	Undefined Saprotroph
OTU1150	0	0	0	0	0	0	0	0	0	2	0	0	0	0	p__Ascomycota	g__Neosetophoma	Saprotroph	Undefined Saprotroph
OTU1602	0	0	0	0	0	0	0	0	0	0	0	0	2	0	p__Ascomycota	g__Shanorella	Saprotroph	Undefined Saprotroph
OTU1619	0	0	0	0	0	0	0	0	0	0	0	0	2	0	p__Ascomycota	g__Arthroderma	Pathotroph-Saprotroph	Animal Pathogen-Undefined Saprotroph
OTU1626	0	0	0	0	0	0	0	0	0	0	0	0	2	0	p__Basidiomycota	g__Coprinopsis	Saprotroph	Dung Saprotroph-Plant Saprotroph-Wood Saprotroph
OTU1636	0	0	0	0	0	0	0	0	0	0	0	0	2	0	p__Ascomycota	g__Alternaria	Pathotroph-Saprotroph-Symbiotroph	Animal Pathogen-Endophyte-Plant Pathogen-Wood Saprotroph
OTU1666	0	0	0	0	0	0	0	0	0	0	0	0	0	2	p__Basidiomycota	g__Geastrum	Saprotroph	Undefined Saprotroph
OTU174	0	0	1	0	0	0	0	0	0	0	1	0	0	0	p__Basidiomycota	g__Leucoagaricus	Saprotroph	Undefined Saprotroph
OTU1905	0	0	0	0	0	0	0	0	0	0	1	1	0	0	p__Ascomycota	g__Hirsutella	Pathotroph	Animal Pathogen
OTU1922	0	0	0	0	0	0	0	0	0	2	0	0	0	0	p__Basidiomycota	g__Sporobolomyces	Pathotroph-Saprotroph	Fungal Parasite-Litter Saprotroph
OTU1923	0	0	0	2	0	0	0	0	0	0	0	0	0	0	p__Basidiomycota	g__Coprinellus	Saprotroph	Dung Saprotroph-Plant Saprotroph-Wood Saprotroph
OTU247	0	0	0	0.333333	0	0	0	0.666667	0	1	0	0	0	0	p__Ascomycota	g__Colletotrichum	Pathotroph-Symbiotroph	Endophyte-Plant Pathogen
OTU303	0	0	0	2	0	0	0	0	0	0	0	0	0	0	p__Basidiomycota	g__Inocybe	Symbiotroph	Ectomycorrhizal
OTU449	0	0	0	0	2	0	0	0	0	0	0	0	0	0	p__Ascomycota	g__unclassified_f__Pleosporaceae	Pathotroph-Saprotroph	Endophyte-Lichen Parasite-Plant Pathogen-Undefined Saprotroph
OTU611	0	0	0	0	0	2	0	0	0	0	0	0	0	0	p__Ascomycota	g__Polytolypa	Saprotroph	Undefined Saprotroph
OTU640	0	0	0	0	0	2	0	0	0	0	0	0	0	0	p__Ascomycota	g__unclassified_f__Gymnoascaceae	Saprotroph	Dung Saprotroph-Plant Saprotroph
OTU674	2	0	0	0	0	0	0	0	0	0	0	0	0	0	p__Basidiomycota	g__unclassified_f__Ceratobasidiaceae	Pathotroph-Saprotroph-Symbiotroph	Endomycorrhizal-Plant Pathogen-Undefined Saprotroph
OTU752	2	0	0	0	0	0	0	0	0	0	0	0	0	0	p__Ascomycota	g__unclassified_o__Hypocreales	Saprotroph	Undefined Saprotroph
OTU826	0	0	0	0	0	0	2	0	0	0	0	0	0	0	p__Ascomycota	g__Exophiala	Pathotroph-Saprotroph	Animal Pathogen-Undefined Saprotroph
OTU895	0	0	0	0	0	0	0	2	0	0	0	0	0	0	p__Chytridiomycota	g__Powellomyces	Pathotroph	Plant Pathogen
OTU898	0	0.333333	0	0	0.666667	0	0	0.666667	0	0	0	0	0.333333	0	p__Ascomycota	g__Thermomyces	Pathotroph-Symbiotroph	Endophyte-Plant Pathogen
OTU98	0	2	0	0	0	0	0	0	0	0	0	0	0	0	p__Ascomycota	g__unclassified_f__Arthrodermataceae	Pathotroph-Saprotroph	Animal Pathogen-Undefined Saprotroph
OTU646	0.666667	0	0.333333	0	0	0	0	0	0	0	0	0	1	0	p__Ascomycota	g__unclassified_p__Ascomycota	-	-
OTU412	0	0	0	0	1	1	0	0	0	0	0	0	0	0	p__Basidiomycota	g__unclassified_c__Agaricomycetes	-	-
OTU1582	0	0	0	0	0	0	0	0	0	0	0	0	2	0	p__unclassified_k__Fungi	g__unclassified_k__Fungi	-	-
OTU340	0	0	0	2	0	0	0	0	0	0	0	0	0	0	p__unclassified_k__Fungi	g__unclassified_k__Fungi	-	-
OTU712	2	0	0	0	0	0	0	0	0	0	0	0	0	0	p__Ascomycota	g__unclassified_o__Sordariales	-	-
OTU64	0	2	0	0	0	0	0	0	0	0	0	0	0	0	p__unclassified_k__Fungi	g__unclassified_k__Fungi	-	-
OTU1757	0	0	0	0	0	1	0	0	0	0	0	0	0	1	p__unclassified_k__Fungi	g__unclassified_k__Fungi	-	-
OTU79	0	2	0	0	0	0	0	0	0	0	0	0	0	0	p__Ascomycota	g__unclassified_o__Pleosporales	-	-
OTU1744	0	0	0	0	0	0	0	0	0	0	0	0	0	2	p__unclassified_k__Fungi	g__unclassified_k__Fungi	-	-
OTU1037	0	0	0	0	0	0	0	0	2	0	0	0	0	0	p__unclassified_k__Fungi	g__unclassified_k__Fungi	-	-
OTU1159	0	0	0	0	0	0	0	0	0	2	0	0	0	0	p__Ascomycota	g__unclassified_f__norank_o__Helotiales	-	-
OTU1334	0	0	0	0	0	0	0	0	0	0	2	0	0	0	p__Ascomycota	g__unclassified_p__Ascomycota	-	-
OTU571	0	0	0	0	0	2	0	0	0	0	0	0	0	0	p__unclassified_k__Fungi	g__unclassified_k__Fungi	-	-
OTU329	0	0	0	2	0	0	0	0	0	0	0	0	0	0	p__unclassified_k__Fungi	g__unclassified_k__Fungi	-	-
OTU1128	0	0	0	0	0	0	0	0	0	2	0	0	0	0	p__Ascomycota	g__unclassified_c__Sordariomycetes	-	-
OTU577	0	0	0	0	0	2	0	0	0	0	0	0	0	0	p__Ascomycota	g__unclassified_c__Eurotiomycetes	-	-
OTU1154	0	0	0	0	0	0	0	0	0	2	0	0	0	0	p__Ascomycota	g__Lalaria	-	-
OTU359	0.333333	0	0	0.666667	0	0	0	0	0	1	0	0	0	0	p__unclassified_k__Fungi	g__unclassified_k__Fungi	-	-
OTU364	0	0	0	0	0	0	0	0	0	2	0	0	0	0	p__unclassified_k__Fungi	g__unclassified_k__Fungi	-	-
OTU1697	0	0	0	0	0	0	0	0	0	0	0	0	0	2	p__unclassified_k__Fungi	g__unclassified_k__Fungi	-	-
OTU597	0	0	0	0	0	2	0	0	0	0	0	0	0	0	p__unclassified_k__Fungi	g__unclassified_k__Fungi	-	-
OTU629	0	0	0	0	0	2	0	0	0	0	0	0	0	0	p__Ascomycota	g__unclassified_o__Pleosporales	-	-
OTU1196	0	0	0	0	0	0	0	0	0	2	0	0	0	0	p__unclassified_k__Fungi	g__unclassified_k__Fungi	-	-
OTU928	0	1	0	0	0	0	0	1	0	0	0	0	0	0	p__Ascomycota	g__unclassified_c__Sordariomycetes	-	-
OTU794	0	0	0	0	0	0	2	0	0	0	0	0	0	0	p__Ascomycota	g__unclassified_p__Ascomycota	-	-
OTU863	0	0	0	0	0	0	0	2	0	0	0	0	0	0	p__Ascomycota	g__unclassified_o__Pezizales	-	-
OTU580	0	0	0	0	0	2	0	0	0	0	0	0	0	0	p__unclassified_k__Fungi	g__unclassified_k__Fungi	-	-
OTU184	0	0	0.666667	0	0.333333	0.666667	0	0	0.333333	0	0	0	0	0	p__unclassified_k__Fungi	g__unclassified_k__Fungi	-	-
OTU1097	0	0	0	0.666667	0	0	0	0	1	0.333333	0	0	0	0	p__Ascomycota	g__unclassified_o__Onygenales	-	-
OTU1327	0	0	0	0	0	1	0	0	0	0	0.666667	0	0	0.333333	p__unclassified_k__Fungi	g__unclassified_k__Fungi	-	-
OTU1010	0	0.333333	0.333333	0	0.333333	0	0	0	0.666667	0	0	0.333333	0	0	p__Ascomycota	g__unclassified_f__Nectriaceae	Saprotroph	Undefined Saprotroph
OTU1583	0.333333	0.333333	0	0	0	0	0	0	0	0	0	0.333333	1	0	p__Ascomycota	g__Microascus	Pathotroph-Saprotroph-Symbiotroph	Animal Pathogen-Endophyte-Plant Pathogen-Undefined Saprotroph
OTU1180	0	0	0.666667	0	0	0	0	0	0	1.33333	0	0	0	0	p__Ascomycota	g__Aspergillus	Saprotroph	Undefined Saprotroph
OTU1485	0	0	0	0	0	1.33333	0	0	0	0	0	0.666667	0	0	p__Basidiomycota	g__Tricholoma	Pathotroph-Symbiotroph	Ectomycorrhizal-Fungal Parasite
OTU1668	0	0	0	0	0	0	0	0	0	0	0	0.666667	0	1.33333	p__Basidiomycota	g__Ustilago	Pathotroph	Plant Pathogen
OTU655	0.666667	0	0	0	0	0	0	1.33333	0	0	0	0	0	0	p__Ascomycota	g__Monascus	Saprotroph	Undefined Saprotroph
OTU992	0	0	0.666667	0	0	0	0	1.33333	0	0	0	0	0	0	p__Ascomycota	g__Kernia	Saprotroph	Dung Saprotroph-Undefined Saprotroph
OTU1134	0	0	0	0.666667	0	0	0	0	0	1.33333	0	0	0	0	p__unclassified_k__Fungi	g__unclassified_k__Fungi	-	-
OTU1481	0	0.666667	0	0	0	0	0	0	0	0	0	1.33333	0	0	p__unclassified_k__Fungi	g__unclassified_k__Fungi	-	-
OTU715	1.33333	0	0	0	0	0	0	0	0	0	0.666667	0	0	0	p__unclassified_k__Fungi	g__unclassified_k__Fungi	-	-
OTU353	0	0	0	1.33333	0	0	0	0	0	0	0.666667	0	0	0	p__unclassified_k__Fungi	g__unclassified_k__Fungi	-	-
OTU92	0	1.33333	0	0	0	0.666667	0	0	0	0	0	0	0	0	p__Ascomycota	g__unclassified_p__Ascomycota	-	-
OTU1186	0.333333	0	0	0	0	0	0	0	0	0.333333	1.33333	0	0	0	p__Ascomycota	g__Trichoderma	Saprotroph	Undefined Saprotroph
OTU1680	0	0.333333	0	0	0.333333	0	0	0	0	0	0	0	0	1.33333	p__Basidiomycota	g__Geastrum	Saprotroph	Undefined Saprotroph
OTU1784	0	0	0	0	0	0	0	0	0	0	0.333333	0.333333	0	1.33333	p__unclassified_k__Fungi	g__unclassified_k__Fungi	-	-
OTU78	0.333333	1.33333	0	0	0	0	0	0	0.333333	0	0	0	0	0	p__Ascomycota	g__unclassified_p__Ascomycota	-	-
OTU1139	0	0	0	0	0	0	0	0	0	1.66667	0	0	0	0	p__Ascomycota	g__Myrothecium	Saprotroph	Undefined Saprotroph
OTU1147	0	0	0	0	0	0	0	0	0	1.66667	0	0	0	0	p__Basidiomycota	g__Coprinopsis	Saprotroph	Dung Saprotroph-Plant Saprotroph-Wood Saprotroph
OTU1166	0	0	0	0	0	0	0	0	0	1.66667	0	0	0	0	p__Basidiomycota	g__Coprinellus	Saprotroph	Dung Saprotroph-Plant Saprotroph-Wood Saprotroph
OTU1185	0	0	0	0	0	0	0	0	0	1.66667	0	0	0	0	p__Ascomycota	g__Lectera	Pathotroph	Plant Pathogen
OTU1255	0	0	0	0	0	0	0	0	0	1.66667	0	0	0	0	p__Ascomycota	g__Phomopsis	Pathotroph-Saprotroph-Symbiotroph	Endophyte-Plant Pathogen-Wood Saprotroph
OTU1264	0	0	0	0	0	0	0	0	0	1.66667	0	0	0	0	p__Basidiomycota	g__Cryptococcus	Pathotroph-Saprotroph-Symbiotroph	Fungal Parasite-Undefined Saprotroph
OTU1274	0	0	0	0	0	0	0	0	0	1.66667	0	0	0	0	p__Ascomycota	g__Leptosphaeria	Pathotroph	Plant Pathogen
OTU1285	0	0	0	0	0	0	0	0	0	1.66667	0	0	0	0	p__Ascomycota	g__Lophiostoma	Saprotroph	Undefined Saprotroph
OTU1315	0	0	0	0	0	0	0	0	0	1.66667	0	0	0	0	p__Ascomycota	g__unclassified_f__Microascaceae	Pathotroph-Saprotroph-Symbiotroph	Animal Pathogen-Endophyte-Plant Pathogen-Undefined Saprotroph
OTU1350	0	0	0	0	0	0	0	0	0	0	1.66667	0	0	0	p__Ascomycota	g__Thielavia	Saprotroph	Dung Saprotroph-Undefined Saprotroph
OTU1486	0	0	0	0	0	0	0	0	0	0	0	1.66667	0	0	p__Ascomycota	g__Aspergillus	Saprotroph	Undefined Saprotroph
OTU1676	0	0	0	0	0	0	0	0	0	0	0	0	0	1.66667	p__Ascomycota	g__Coniocessia	Saprotroph	Undefined Saprotroph
OTU1871	0	0	0	0	0	0	0	0	0	0	0	0	1.66667	0	p__Ascomycota	g__Calcarisporiella	Saprotroph	Undefined Saprotroph
OTU211	0	0	0	1.66667	0	0	0	0	0	0	0	0	0	0	p__Ascomycota	g__Leptodiscella	Saprotroph	Undefined Saprotroph
OTU292	0	0	0	1.66667	0	0	0	0	0	0	0	0	0	0	p__Chytridiomycota	g__Spizellomyces	Pathotroph	Plant Pathogen-Undefined Parasite-Undefined Saprotroph
OTU294	0	0	0	1.66667	0	0	0	0	0	0	0	0	0	0	p__Ascomycota	g__Scutellinia	Saprotroph	Undefined Saprotroph
OTU416	0	0	0	0	1.66667	0	0	0	0	0	0	0	0	0	p__Ascomycota	g__unclassified_f__Lasiosphaeriaceae	Saprotroph	Undefined Saprotroph
OTU48	0	1.66667	0	0	0	0	0	0	0	0	0	0	0	0	p__Basidiomycota	g__Cortinarius	Symbiotroph	Ectomycorrhizal
OTU503	0	0	0	0	0	1.66667	0	0	0	0	0	0	0	0	p__Ascomycota	g__Aspergillus	Saprotroph	Undefined Saprotroph
OTU553	0	0	0	0	0	1.66667	0	0	0	0	0	0	0	0	p__Ascomycota	g__Chaetosphaeria	Saprotroph-Symbiotroph	Endophyte-Litter Saprotroph-Wood Saprotroph
OTU565	0	0	0	0	0	1.66667	0	0	0	0	0	0	0	0	p__Basidiomycota	g__Agrocybe	Saprotroph	Dung Saprotroph-Soil Saprotroph-Undefined Saprotroph
OTU613	0	0	0	0	0	1.66667	0	0	0	0	0	0	0	0	p__Ascomycota	g__Clonostachys	Pathotroph	Plant Pathogen
OTU691	1.66667	0	0	0	0	0	0	0	0	0	0	0	0	0	p__Ascomycota	g__unclassified_f__Myxotrichaceae	Saprotroph-Symbiotroph	Ectomycorrhizal-Undefined Saprotroph
OTU742	1.66667	0	0	0	0	0	0	0	0	0	0	0	0	0	p__Zygomycota	g__Mortierella	Saprotroph-Symbiotroph	Endophyte-Litter Saprotroph-Soil Saprotroph-Undefined Saprotroph
OTU768	1.66667	0	0	0	0	0	0	0	0	0	0	0	0	0	p__Basidiomycota	g__Tomentella	Symbiotroph	Ectomycorrhizal
OTU824	0	0	0	0	0	0	1.66667	0	0	0	0	0	0	0	p__Ascomycota	g__unclassified_o__Hypocreales	Saprotroph	Undefined Saprotroph
OTU871	0	0	0	0	0	0	0	1.66667	0	0	0	0	0	0	p__Basidiomycota	g__Auricularia	Saprotroph	Undefined Saprotroph
OTU878	0	0	0	0	0	0	0	1.66667	0	0	0	0	0	0	p__Ascomycota	g__Ampelomyces	Saprotroph-Symbiotroph	Endophyte-Undefined Saprotroph
OTU892	0	0	0	0	0	0	0	1.66667	0	0	0	0	0	0	p__Ascomycota	g__Chaetomium	Pathotroph-Saprotroph-Symbiotroph	Animal Pathogen-Dung Saprotroph-Endophyte-Epiphyte-Plant Saprotroph-Wood Saprotroph
OTU969	0	0	0	0	0	0	0	1.66667	0	0	0	0	0	0	p__Zygomycota	g__Mortierella	Saprotroph-Symbiotroph	Endophyte-Litter Saprotroph-Soil Saprotroph-Undefined Saprotroph
OTU982	0	0	0	0	0	0	0	1.66667	0	0	0	0	0	0	p__Basidiomycota	g__Tomentella	Symbiotroph	Ectomycorrhizal
OTU984	0	0	0	0	0	0	0	1.66667	0	0	0	0	0	0	p__Ascomycota	g__unclassified_f__Sporormiaceae	Saprotroph	Dung Saprotroph-Plant Saprotroph
OTU990	0	0	0	0	0	0	0	1.66667	0	0	0	0	0	0	p__Ascomycota	g__Podosphaera	Pathotroph	Plant Pathogen
OTU997	0	0	0	0	0	0	0	1.66667	0	0	0	0	0	0	p__Ascomycota	g__Arthrographis	Saprotroph	Undefined Saprotroph
OTU474	0	0	0	0	0	1.66667	0	0	0	0	0	0	0	0	p__unclassified_k__Fungi	g__unclassified_k__Fungi	-	-
OTU894	0	0	0	0	0	0	0	1.66667	0	0	0	0	0	0	p__unclassified_k__Fungi	g__unclassified_k__Fungi	-	-
OTU860	0	0	0	0	0	0	0	1.66667	0	0	0	0	0	0	p__unclassified_k__Fungi	g__unclassified_k__Fungi	-	-
OTU1827	0	0	0	0	0	1.66667	0	0	0	0	0	0	0	0	p__Ascomycota	g__unclassified_p__Ascomycota	-	-
OTU1994	0	0	0	0	0	0	0	1.66667	0	0	0	0	0	0	p__Ascomycota	g__unclassified_c__Leotiomycetes	-	-
OTU1257	0	0	0	0	0	0	0	0	0	1.66667	0	0	0	0	p__Ascomycota	g__unclassified_o__Pleosporales	-	-
OTU1273	0	0	0	0	0	0	0	0	0	1.66667	0	0	0	0	p__unclassified_k__Fungi	g__unclassified_k__Fungi	-	-
OTU957	0	0	0	0	0	0	0	1.66667	0	0	0	0	0	0	p__unclassified_k__Fungi	g__unclassified_k__Fungi	-	-
OTU1244	0	0	0	0	0	0	0	0	0	1.66667	0	0	0	0	p__Ascomycota	g__unclassified_c__Leotiomycetes	-	-
OTU798	0	0	0	0	0	0	1.66667	0	0	0	0	0	0	0	p__Ascomycota	g__unclassified_o__Chaetothyriales	-	-
OTU724	1.66667	0	0	0	0	0	0	0	0	0	0	0	0	0	p__unclassified_k__Fungi	g__unclassified_k__Fungi	-	-
OTU531	0	0	0	0	0	1.66667	0	0	0	0	0	0	0	0	p__unclassified_k__Fungi	g__unclassified_k__Fungi	-	-
OTU566	0	0	0	0	0	1.66667	0	0	0	0	0	0	0	0	p__unclassified_k__Fungi	g__unclassified_k__Fungi	-	-
OTU1035	0	0	0	0	0	0	0	0	1.66667	0	0	0	0	0	p__unclassified_k__Fungi	g__unclassified_k__Fungi	-	-
OTU685	1.66667	0	0	0	0	0	0	0	0	0	0	0	0	0	p__unclassified_k__Fungi	g__unclassified_k__Fungi	-	-
OTU588	0	0	0	0	0	1.66667	0	0	0	0	0	0	0	0	p__Ascomycota	g__unclassified_o__Pleosporales	-	-
OTU1157	0	0	0	0	0	0	0	0	0	1.66667	0	0	0	0	p__unclassified_k__Fungi	g__unclassified_k__Fungi	-	-
OTU567	0	0	0	0	0	1.66667	0	0	0	0	0	0	0	0	p__unclassified_k__Fungi	g__unclassified_k__Fungi	-	-
OTU520	0	0	0	0	0	1.66667	0	0	0	0	0	0	0	0	p__Ascomycota	g__unclassified_p__Ascomycota	-	-
OTU1569	0	0	0	0	0	0	0	0	0	0	0	0	1.66667	0	p__unclassified_k__Fungi	g__unclassified_k__Fungi	-	-
OTU857	0	0	0	0	0	0	0	1.66667	0	0	0	0	0	0	p__Ascomycota	g__unclassified_o__Pleosporales	-	-
OTU1441	0	0	0	0	0	0	0	0	0	0	0.666667	1	0	0	p__Basidiomycota	g__Coprinopsis	Saprotroph	Dung Saprotroph-Plant Saprotroph-Wood Saprotroph
OTU1754	0	0	0	0.333333	0	0	0	0	0	0.666667	0	0	0	0.666667	p__Basidiomycota	g__Tulostoma	Saprotroph	Soil Saprotroph
OTU1958	0.333333	0	0	0.666667	0	0	0	0	0	0	0.666667	0	0	0	p__Ascomycota	g__unclassified_o__Hypocreales	Saprotroph	Undefined Saprotroph
OTU1988	0	0	0	0	0.333333	0	0	0.666667	0	0	0	0.666667	0	0	p__Ascomycota	g__Candida	Saprotroph	Undefined Saprotroph
OTU358	0	0	0	1	0	0.666667	0	0	0	0	0	0	0	0	p__Ascomycota	g__Exophiala	Pathotroph-Saprotroph	Animal Pathogen-Undefined Saprotroph
OTU807	0.333333	0	0	0	0.666667	0	0.666667	0	0	0	0	0	0	0	p__Ascomycota	g__unclassified_o__Hypocreales	Saprotroph	Undefined Saprotroph
OTU1748	0	0.666667	0	0	0	0	0	0	0	0	0	0	0	1	p__Basidiomycota	g__unclassified_p__Basidiomycota	-	-
OTU1466	0	0	0	0	0	0	0	0	0	0.666667	0	1	0	0	p__unclassified_k__Fungi	g__unclassified_k__Fungi	-	-
OTU1793	0	0	0	0	0.666667	0	0	1	0	0	0	0	0	0	p__Basidiomycota	g__unclassified_o__Polyporales	-	-
OTU1987	0	0	0	0.333333	0.333333	0	0	0.333333	0.666667	0	0	0	0	0	p__Ascomycota	g__Leptodontidium	Symbiotroph	Endophyte
OTU620	0	0	0	0	0	0.333333	0	0	0	0.333333	1	0	0	0	p__Ascomycota	g__Mycothermus	Pathotroph-Saprotroph-Symbiotroph	Animal Pathogen-Dung Saprotroph-Endophyte-Epiphyte-Plant Saprotroph-Wood Saprotroph
OTU804	0	0	0.333333	0	0	0	0.666667	0	0.333333	0	0	0	0	0.333333	p__Ascomycota	g__Kraurogymnocarpa	Saprotroph	Undefined Saprotroph
OTU241	0	0	0.333333	0.666667	0.333333	0	0	0	0.333333	0	0	0	0	0	p__Ascomycota	g__unclassified_o__Coniochaetales	-	-
OTU1770	0	0	0	0	0	1	0	0	0	0	0.333333	0	0	0.333333	p__unclassified_k__Fungi	g__unclassified_k__Fungi	-	-
OTU1534	0	0	0	0	0.666667	0.333333	0	0	0	0	0.333333	0.333333	0	0	p__unclassified_k__Fungi	g__unclassified_k__Fungi	-	-
OTU1913	0	0	0	0	0	0	0	0.333333	0.666667	0	0	0.333333	0	0.333333	p__Ascomycota	g__unclassified_c__Eurotiomycetes	-	-
OTU538	0	0	0	0.333333	0	0.333333	0	0.333333	0	0.333333	0	0	0.333333	0	p__Ascomycota	g__Acremonium	Pathogen-Saprotroph-Symbiotroph	Animal Pathogen-Endophyte-Fungal Parasite-Plant Pathogen-Wood Saprotroph
OTU1759	0.333333	0	0	0	0.333333	0.333333	0	0.333333	0	0	0	0	0	0.333333	p__Ascomycota	g__unclassified_c__Eurotiomycetes	-	-
OTU107	0	1.33333	0	0	0.333333	0	0	0	0	0	0	0	0	0	p__Ascomycota	g__unclassified_f__Amphisphaeriaceae	Saprotroph	Undefined Saprotroph
OTU1294	0	0	0	0	0	0	0	0	1.33333	0.333333	0	0	0	0	p__Basidiomycota	g__Dioszegia	Pathotroph-Saprotroph-Symbiotroph	Fungal Parasite-Undefined Saprotroph
OTU599	0	0	0	0	0	1.33333	0	0	0.333333	0	0	0	0	0	p__Zygomycota	g__Ramicandelaber	Saprotroph	Undefined Saprotroph
OTU360	0	0	0	1.33333	0	0	0	0	0.333333	0	0	0	0	0	p__Ascomycota	g__unclassified_p__Ascomycota	-	-
OTU696	1.33333	0.333333	0	0	0	0	0	0	0	0	0	0	0	0	p__Ascomycota	g__unclassified_p__Ascomycota	-	-
OTU1265	0	0	0	0	0	0	0	0	0	1.33333	0.333333	0	0	0	p__Ascomycota	g__unclassified_o__Pezizales	-	-
OTU740	1.33333	0	0	0	0	0	0	0	0	0	0.333333	0	0	0	p__unclassified_k__Fungi	g__unclassified_k__Fungi	-	-
OTU714	0.333333	1.33333	0	0	0	0	0	0	0	0	0	0	0	0	p__Ascomycota	g__unclassified_p__Ascomycota	-	-
OTU155	0	0	0	0.333333	1.33333	0	0	0	0	0	0	0	0	0	p__unclassified_k__Fungi	g__unclassified_k__Fungi	-	-
OTU1203	0	0	0	0	0	0	0	0.333333	0	1.33333	0	0	0	0	p__Ascomycota	g__unclassified_p__Ascomycota	-	-
OTU1326	0	0	0	0	0	0	0	0	0	0	1.33333	0	0.333333	0	p__Basidiomycota	g__unclassified_o__Agaricales	-	-
OTU663	1.33333	0	0	0	0	0	0	0	0	0	0.333333	0	0	0	p__unclassified_k__Fungi	g__unclassified_k__Fungi	-	-
OTU274	0	0	0	1.33333	0	0	0	0.333333	0	0	0	0	0	0	p__unclassified_k__Fungi	g__unclassified_k__Fungi	-	-
OTU426	0.333333	0	0	0	1.33333	0	0	0	0	0	0	0	0	0	p__Ascomycota	g__unclassified_o__Capnodiales	-	-
OTU1249	0	0	0	0	0	0	0	0	0	0.666667	0	0	0	0.666667	p__Ascomycota	g__Stachybotrys	Saprotroph	Undefined Saprotroph
OTU212	0	0	0.666667	0.666667	0	0	0	0	0	0	0	0	0	0	p__Basidiomycota	g__Trechispora	Saprotroph	Wood Saprotroph
OTU391	0	0	0	0	0	0	0	0.666667	0	0	0	0	0.666667	0	p__Glomeromycota	g__unclassified_c__Glomeromycetes	Symbiotroph	Arbuscular Mycorrhizal
OTU366	0	0	0	0.666667	0	0	0	0.666667	0	0	0	0	0	0	p__unclassified_k__Fungi	g__unclassified_k__Fungi	-	-
OTU925	0	0	0	0.666667	0	0	0	0.666667	0	0	0	0	0	0	p__Ascomycota	g__unclassified_c__Sordariomycetes	-	-
OTU36	0	0.666667	0	0	0	0.666667	0	0	0	0	0	0	0	0	p__unclassified_k__Fungi	g__unclassified_k__Fungi	-	-
OTU484	0	0	0	0.666667	0	0.666667	0	0	0	0	0	0	0	0	p__unclassified_k__Fungi	g__unclassified_k__Fungi	-	-
OTU1100	0	0	0	0	0	0	0	0	0.666667	0.333333	0.333333	0	0	0	p__Basidiomycota	g__Cryptococcus	Pathotroph-Saprotroph-Symbiotroph	Fungal Parasite-Undefined Saprotroph
OTU1102	0	0	0	0	0	0	0	0	1	0.333333	0	0	0	0	p__Ascomycota	g__Pleospora	Pathotroph-Saprotroph	Endophyte-Lichen Parasite-Plant Pathogen-Undefined Saprotroph
OTU1355	0	0	0	0.666667	0	0	0	0	0	0	0.333333	0.333333	0	0	p__Ascomycota	g__Scolecobasidium	Saprotroph	Undefined Saprotroph
OTU1462	0	0	0.666667	0	0	0	0	0	0.333333	0	0	0.333333	0	0	p__Basidiomycota	g__Calvatia	Saprotroph	Undefined Saprotroph
OTU1716	0	0	0	0	0.333333	0	0	0	0	0	0	0	0	1	p__Basidiomycota	g__Entoloma	Pathotroph-Saprotroph-Symbiotroph	Ectomycorrhizal-Fungal Parasite-Soil Saprotroph-Undefined Saprotroph
OTU1756	0	0	0	0	0	0	0	0	0.333333	0	0	0	0	1	p__Ascomycota	g__Engyodontium	Pathotroph	Animal Pathogen
OTU1790	0	0	0	0	0.333333	0	0	0	0	1	0	0	0	0	p__Basidiomycota	g__Steccherinum	Saprotroph	Undefined Saprotroph
OTU1917	0.333333	0	0	0.333333	0	0	0	0	0	0	0	0.666667	0	0	p__Ascomycota	g__Amauroascus	Saprotroph	Dung Saprotroph-Soil Saprotroph
OTU1953	0	0	0	0	0	0	0	1	0	0	0	0.333333	0	0	p__Ascomycota	g__Aspergillus	Saprotroph	Undefined Saprotroph
OTU202	0	0	0.333333	1	0	0	0	0	0	0	0	0	0	0	p__Ascomycota	g__Setophaeosphaeria	Pathotroph-Saprotroph	Fungal Parasite-Plant Pathogen-Plant Saprotroph
OTU345	0.333333	0	0	1	0	0	0	0	0	0	0	0	0	0	p__Ascomycota	g__Nectria	Pathotroph-Saprotroph-Symbiotroph	Animal Pathogen-Endophyte-Fungal Parasite-Lichen Parasite-Plant Pathogen-Wood Saprotroph
OTU55	0	1	0.333333	0	0	0	0	0	0	0	0	0	0	0	p__Ascomycota	g__unclassified_f__Montagnulaceae	Pathotroph-Saprotroph	Fungal Parasite-Plant Pathogen-Undefined Saprotroph
OTU883	0	0	0	0	0	0	0	0.333333	0	0	0	0	1	0	p__Basidiomycota	g__Geastrum	Saprotroph	Undefined Saprotroph
OTU1031	0	0	0	0	0	0	0	0	0.333333	0	0	0.333333	0	0.666667	p__unclassified_k__Fungi	g__unclassified_k__Fungi	-	-
OTU859	0	0	0	0	0.333333	0	0	1	0	0	0	0	0	0	p__unclassified_k__Fungi	g__unclassified_k__Fungi	-	-
OTU331	0	0	0	0.333333	0.666667	0	0	0	0	0	0	0	0	0.333333	p__unclassified_k__Fungi	g__unclassified_k__Fungi	-	-
OTU1036	0	0	0	0	0.333333	0	0	0	1	0	0	0	0	0	p__unclassified_k__Fungi	g__unclassified_k__Fungi	-	-
OTU1246	0	0	0	0.333333	0	0	0	0	0	1	0	0	0	0	p__Ascomycota	g__unclassified_o__Xylariales	-	-
OTU1113	0.333333	0	0	0	0	0	0	0	0	1	0	0	0	0	p__unclassified_k__Fungi	g__unclassified_k__Fungi	-	-
OTU755	0.333333	0	0	0	0	0	0	0	0	1	0	0	0	0	p__unclassified_k__Fungi	g__unclassified_k__Fungi	-	-
OTU112	0	1	0	0	0	0	0	0	0	0	0	0.333333	0	0	p__unclassified_k__Fungi	g__unclassified_k__Fungi	-	-
OTU181	0	0.333333	0.666667	0.333333	0	0	0	0	0	0	0	0	0	0	p__Ascomycota	g__unclassified_c__Dothideomycetes	-	-
OTU1683	0	0.333333	0	0	0	0	0	0	0	0	0	0	0	1	p__unclassified_k__Fungi	g__unclassified_k__Fungi	-	-
OTU711	0.666667	0	0	0	0.333333	0	0	0	0	0	0	0.333333	0	0	p__unclassified_k__Fungi	g__unclassified_k__Fungi	-	-
OTU753	0.333333	0	0	0	0	0	0	0	0	1	0	0	0	0	p__Ascomycota	g__Retroconis	-	-
OTU1482	0	0	0	0	0	0	0	0	0	0.333333	0	1	0	0	p__unclassified_k__Fungi	g__unclassified_k__Fungi	-	-
OTU394	0.333333	0	0	0	1	0	0	0	0	0	0	0	0	0	p__unclassified_k__Fungi	g__unclassified_k__Fungi	-	-
OTU123	0	1	0	0	0	0	0	0	0	0	0	0.333333	0	0	p__unclassified_k__Fungi	g__unclassified_k__Fungi	-	-
OTU379	0	0	0	0	1	0	0	0.333333	0	0	0	0	0	0	p__Ascomycota	g__unclassified_o__Sordariales	-	-
OTU1303	0	0	0	0	0	0	0	0.333333	0	1	0	0	0	0	p__unclassified_k__Fungi	g__unclassified_k__Fungi	-	-
OTU113	0	1	0	0.333333	0	0	0	0	0	0	0	0	0	0	p__Ascomycota	g__unclassified_c__Dothideomycetes	-	-
OTU653	0.666667	0	0	0.333333	0	0	0	0	0	0	0	0.333333	0	0	p__unclassified_k__Fungi	g__unclassified_k__Fungi	-	-
OTU1786	0	0	0	0	0	0	0	0	0	0	0	0.333333	0	1	p__Basidiomycota	g__Gastrosporium	-	-
OTU1857	0	0.333333	0	0.666667	0.333333	0	0	0	0	0	0	0	0	0	p__Ascomycota	g__unclassified_c__Sordariomycetes	-	-
OTU495	0	0	0	0	0	1	0	0	0	0	0	0	0	0.333333	p__unclassified_k__Fungi	g__unclassified_k__Fungi	-	-
OTU665	0.333333	0	0	0	0	0.333333	0	0.333333	0	0	0	0	0	0.333333	p__Basidiomycota	g__Rhodotorula	Pathotroph-Saprotroph	Animal Endosymbiont-Animal Pathogen-Endophyte-Plant Pathogen-Undefined Saprotroph
OTU733	0.333333	0	0	0.333333	0.333333	0	0	0	0	0	0	0.333333	0	0	p__Ascomycota	g__Neosetophoma	Saprotroph	Undefined Saprotroph
OTU1021	0	0	0.333333	0.333333	0	0	0	0.333333	0.333333	0	0	0	0	0	p__Ascomycota	g__unclassified_p__Ascomycota	-	-
OTU1007	0	0	0	0	0	0	0	0	1.33333	0	0	0	0	0	p__Basidiomycota	g__unclassified_f__Thelephoraceae	Saprotroph-Symbiotroph	Ectomycorrhizal-Undefined Saprotroph
OTU1024	0	0	0	0	0	0	0	0	1.33333	0	0	0	0	0	p__Ascomycota	g__Oidiodendron	Pathotroph-Symbiotroph	Ericoid Mycorrhizal
OTU1063	0	0	0	0	0	0	0	0	1.33333	0	0	0	0	0	p__Ascomycota	g__Talaromyces	Saprotroph	Undefined Saprotroph
OTU1135	0	0	0	0	0	0	0	0	0	1.33333	0	0	0	0	p__Ascomycota	g__Tuber	Symbiotroph	Ectomycorrhizal
OTU1141	0	0	0	0	0	0	0	0	0	1.33333	0	0	0	0	p__Ascomycota	g__Cyphellophora	Pathotroph-Symbiotroph	Epiphyte-Plant Pathogen
OTU1488	0	0	0	0	0	0	0	0	0	0	0	1.33333	0	0	p__Ascomycota	g__unclassified_f__Hyponectriaceae	Pathotroph-Saprotroph	Plant Pathogen-Undefined Saprotroph
OTU1535	0	0	0	0	0	0	0	0	0	0	0	1.33333	0	0	p__Ascomycota	g__Camarosporium	Pathotroph-Symbiotroph	Endophyte-Plant Pathogen
OTU1546	0	0	0	0	0	0	0	0	0	0	0	0	1.33333	0	p__Ascomycota	g__Tetracladium	Saprotroph	Undefined Saprotroph
OTU1690	0	0	0	0	0	0	0	0	0	0	0	0	0	1.33333	p__Ascomycota	g__Chloridium	Symbiotroph	Ectomycorrhizal
OTU1797	0	0	0	0	0	0	0	0	0	0	0	0	1.33333	0	p__Ascomycota	g__Microascus	Pathotroph-Saprotroph-Symbiotroph	Animal Pathogen-Endophyte-Plant Pathogen-Undefined Saprotroph
OTU19	0	1.33333	0	0	0	0	0	0	0	0	0	0	0	0	p__Ascomycota	g__Cladorrhinum	Pathotroph-Saprotroph-Symbiotroph	Animal Pathogen-Dung Saprotroph-Endophyte-Plant Saprotroph-Soil Saprotroph-Wood Saprotroph
OTU2031	0	0	0	0	0	0	0	1.33333	0	0	0	0	0	0	p__Ascomycota	g__Gymnoascus	Saprotroph	Undefined Saprotroph
OTU265	0	0	0	1.33333	0	0	0	0	0	0	0	0	0	0	p__Ascomycota	g__Rotiferophthora	Pathotroph	Animal Pathogen
OTU291	0	0	0	1.33333	0	0	0	0	0	0	0	0	0	0	p__Basidiomycota	g__Lepiota	Saprotroph	Soil Saprotroph
OTU344	0	0	0	1.33333	0	0	0	0	0	0	0	0	0	0	p__Basidiomycota	g__Inocybe	Symbiotroph	Ectomycorrhizal
OTU411	0	0	0	0	1.33333	0	0	0	0	0	0	0	0	0	p__Ascomycota	g__Phoma	Pathotroph-Saprotroph-Symbiotroph	Endophyte-Dung Saprotroph-Lichen Parasite-Litter Saprotroph-Plant Pathogen-Soil Saprotroph-Wood Saprotroph
OTU436	0	0	0	0	1.33333	0	0	0	0	0	0	0	0	0	p__Basidiomycota	g__Calyptella	Saprotroph	Undefined Saprotroph
OTU469	0	0	0	0	0	1.33333	0	0	0	0	0	0	0	0	p__Ascomycota	g__Verticillium	Pathotroph-Symbiotroph	Endophyte-Fungal Parasite-Plant Pathogen
OTU593	0	0	0	0	0	1.33333	0	0	0	0	0	0	0	0	p__Zygomycota	g__Umbelopsis	Saprotroph	Undefined Saprotroph
OTU916	0	0	0	0	0	0	0	1.33333	0	0	0	0	0	0	p__Ascomycota	g__unclassified_f__Lasiosphaeriaceae	Saprotroph	Undefined Saprotroph
OTU926	0	0	0	0	0	0	0	1.33333	0	0	0	0	0	0	p__Ascomycota	g__Preussia	Saprotroph	Dung Saprotroph-Plant Saprotroph
OTU958	0	0	0	0	0	0	0	1.33333	0	0	0	0	0	0	p__Ascomycota	g__Lophiostoma	Saprotroph	Undefined Saprotroph
OTU988	0	0	0	0	0	0	0	1.33333	0	0	0	0	0	0	p__Ascomycota	g__Wardomycopsis	Saprotroph	Undefined Saprotroph
OTU773	1.33333	0	0	0	0	0	0	0	0	0	0	0	0	0	p__unclassified_k__Fungi	g__unclassified_k__Fungi	-	-
OTU1093	0	0	0	0	0	0	0	0	1.33333	0	0	0	0	0	p__Ascomycota	g__unclassified_p__Ascomycota	-	-
OTU301	0	0	0	1.33333	0	0	0	0	0	0	0	0	0	0	p__unclassified_k__Fungi	g__unclassified_k__Fungi	-	-
OTU527	0	0	0	0	0	1.33333	0	0	0	0	0	0	0	0	p__Ascomycota	g__unclassified_c__Sordariomycetes	-	-
OTU187	0	0	1.33333	0	0	0	0	0	0	0	0	0	0	0	p__unclassified_k__Fungi	g__unclassified_k__Fungi	-	-
OTU518	0	0	0	0	0	1.33333	0	0	0	0	0	0	0	0	p__Basidiomycota	g__unclassified_p__Basidiomycota	-	-
OTU205	0	0	0	1.33333	0	0	0	0	0	0	0	0	0	0	p__unclassified_k__Fungi	g__unclassified_k__Fungi	-	-
OTU1148	0	0	0	0	0	0	0	0	0	1.33333	0	0	0	0	p__unclassified_k__Fungi	g__unclassified_k__Fungi	-	-
OTU1050	0	0	0	0	0	0	0	0	1.33333	0	0	0	0	0	p__unclassified_k__Fungi	g__unclassified_k__Fungi	-	-
OTU1574	0	0	0	0	0	0	0	0	0	0	0	0	1.33333	0	p__Ascomycota	g__unclassified_p__Ascomycota	-	-
OTU1929	0	0	0	0	0	0	0	0	0	0	1.33333	0	0	0	p__Ascomycota	g__unclassified_o__Pezizales	-	-
OTU473	0	0	0	0	0	1.33333	0	0	0	0	0	0	0	0	p__unclassified_k__Fungi	g__unclassified_k__Fungi	-	-
OTU167	0	0	1.33333	0	0	0	0	0	0	0	0	0	0	0	p__unclassified_k__Fungi	g__unclassified_k__Fungi	-	-
OTU1719	0	0	0	0	0	0	0	0	0	0	0	0	0	1.33333	p__Ascomycota	g__unclassified_p__Ascomycota	-	-
OTU1014	0	0	0	0	0	0	0	0	1.33333	0	0	0	0	0	p__Ascomycota	g__unclassified_c__Sordariomycetes	-	-
OTU978	0	0	0	0	0	0	0	1.33333	0	0	0	0	0	0	p__Basidiomycota	g__unclassified_f__Phanerochaetaceae	-	-
OTU80	0	1.33333	0	0	0	0	0	0	0	0	0	0	0	0	p__unclassified_k__Fungi	g__unclassified_k__Fungi	-	-
OTU216	0	0	0	1.33333	0	0	0	0	0	0	0	0	0	0	p__Ascomycota	g__unclassified_p__Ascomycota	-	-
OTU243	0	0	0	1.33333	0	0	0	0	0	0	0	0	0	0	p__unclassified_k__Fungi	g__unclassified_k__Fungi	-	-
OTU190	0	0	1.33333	0	0	0	0	0	0	0	0	0	0	0	p__unclassified_k__Fungi	g__unclassified_k__Fungi	-	-
OTU100	0	1.33333	0	0	0	0	0	0	0	0	0	0	0	0	p__Ascomycota	g__unclassified_p__Ascomycota	-	-
OTU1266	0	0	0	0	0	0	0	0	0	1.33333	0	0	0	0	p__unclassified_k__Fungi	g__unclassified_k__Fungi	-	-
OTU1616	0	0	0	0	0	0	0	0	0	0	0	0	1.33333	0	p__unclassified_k__Fungi	g__unclassified_k__Fungi	-	-
OTU235	0	0	0	1.33333	0	0	0	0	0	0	0	0	0	0	p__Ascomycota	g__unclassified_o__Helotiales	-	-
OTU91	0	1.33333	0	0	0	0	0	0	0	0	0	0	0	0	p__Ascomycota	g__unclassified_p__Ascomycota	-	-
OTU1354	0	0	0	0	0	0	0	0	0	0	1.33333	0	0	0	p__unclassified_k__Fungi	g__unclassified_k__Fungi	-	-
OTU938	0	0	0	0	0	0	0	1.33333	0	0	0	0	0	0	p__unclassified_k__Fungi	g__unclassified_k__Fungi	-	-
OTU1342	0	0	0	0	0	0	0	0	0	0	1.33333	0	0	0	p__unclassified_k__Fungi	g__unclassified_k__Fungi	-	-
OTU1240	0	0	0	0	0	0	0	0	0	1.33333	0	0	0	0	p__Basidiomycota	g__unclassified_p__Basidiomycota	-	-
OTU1496	0	0	0	0	0	0	0	0	0	0	0	1.33333	0	0	p__unclassified_k__Fungi	g__unclassified_k__Fungi	-	-
OTU1013	0	0	0	0	0	0	0	0	1	0	0	0	0	0	p__Ascomycota	g__unclassified_f__Xylariaceae	Pathotroph-Saprotroph-Symbiotroph	Dung Saprotroph-Endophyte-Plant Pathogen-Undefined Saprotroph
OTU102	0	0.666667	0.333333	0	0	0	0	0	0	0	0	0	0	0	p__Basidiomycota	g__Lycoperdon	Saprotroph	Undefined Saprotroph
OTU1059	0	0	0	0	0	0	0	0	1	0	0	0	0	0	p__Ascomycota	g__Monographella	Pathotroph	Plant Pathogen
OTU1086	0	0	0	0	0	0	0	0	0.666667	0.333333	0	0	0	0	p__Zygomycota	g__Rhizopus	Saprotroph	Undefined Saprotroph
OTU1120	0	0	0	0	0	0	0	0	0	1	0	0	0	0	p__Basidiomycota	g__Dentipellis	Saprotroph	Undefined Saprotroph
OTU1145	0	0	0	0	0	0	0	0	0	1	0	0	0	0	p__Ascomycota	g__Hansfordia	Saprotroph	Undefined Saprotroph
OTU1199	0	0	0	0	0.333333	0	0	0	0	0.666667	0	0	0	0	p__Basidiomycota	g__Bjerkandera	Saprotroph	Wood Saprotroph
OTU1228	0	0	0	0	0	0	0	0	0	1	0	0	0	0	p__Ascomycota	g__Pseudocercospora	Pathotroph	Plant Pathogen
OTU124	0	1	0	0	0	0	0	0	0	0	0	0	0	0	p__Basidiomycota	g__Trechispora	Saprotroph	Wood Saprotroph
OTU1250	0	0	0	0	0	0	0	0	0	1	0	0	0	0	p__Chytridiomycota	g__Rhizophlyctis	Saprotroph	Undefined Saprotroph
OTU1254	0	0	0	0	0	0	0	0	0	1	0	0	0	0	p__Ascomycota	g__Myrothecium	Saprotroph	Undefined Saprotroph
OTU1272	0	0	0	0	0	0	0	0	0	1	0	0	0	0	p__Basidiomycota	g__Stereum	Saprotroph	Undefined Saprotroph
OTU1405	0	0	0	0	0	0	0	0	0	0	1	0	0	0	p__Basidiomycota	g__Geastrum	Saprotroph	Undefined Saprotroph
OTU1478	0	0	0.333333	0	0	0	0	0	0	0	0	0.666667	0	0	p__Ascomycota	g__Cladosporium	Pathotroph-Saprotroph-Symbiotroph	Animal Pathogen-Endophyte-Lichen Parasite-Plant Pathogen-Wood Saprotroph
OTU1479	0	0.333333	0	0	0	0	0	0	0	0	0	0.666667	0	0	p__Zygomycota	g__Mortierella	Saprotroph-Symbiotroph	Endophyte-Litter Saprotroph-Soil Saprotroph-Undefined Saprotroph
OTU154	0	0	1	0	0	0	0	0	0	0	0	0	0	0	p__Basidiomycota	g__Hyphodontia	Saprotroph	Undefined Saprotroph
OTU1579	0	0	0	0	0	0	0	0	0.333333	0	0	0	0.666667	0	p__Basidiomycota	g__unclassified_f__Agaricaceae	Saprotroph	Undefined Saprotroph
OTU1596	0	0	0	0	0	0	0	0	0	0	0	0	1	0	p__Ascomycota	g__Cyberlindnera	Saprotroph	Undefined Saprotroph
OTU1604	0	0	0	0	0	0	0	0	0	0	0	0	1	0	p__Ascomycota	g__Stachybotrys	Saprotroph	Undefined Saprotroph
OTU1614	0	0	0	0	0	0	0	0	0	0	0	0	1	0	p__Ascomycota	g__Staphylotrichum	Saprotroph	Undefined Saprotroph
OTU1628	0	0	0	0	0	0	0	0	0	0	0	0	1	0	p__Ascomycota	g__Kernia	Saprotroph	Dung Saprotroph-Undefined Saprotroph
OTU1631	0	0	0	0	0	0	0	0	0	0	0	0	1	0	p__Ascomycota	g__Myxotrichum	Saprotroph-Symbiotroph	Dung Saprotroph-Ericoid Mycorrhizal-Lichenized
OTU1651	0	0	0	0	0	0	0	0	0	0	0.333333	0	0.666667	0	p__Ascomycota	g__unclassified_o__Hypocreales	Saprotroph	Undefined Saprotroph
OTU1739	0	0	0	0	0	0	0	0	0	0	0	0	0	1	p__Ascomycota	g__unclassified_f__Chaetomiaceae	Pathotroph-Saprotroph-Symbiotroph	Animal Pathogen-Dung Saprotroph-Endophyte-Epiphyte-Plant Saprotroph-Wood Saprotroph
OTU1755	0	0	0	0	0	0	0	0	0	0	0	0	0	1	p__Basidiomycota	g__Wallemia	Saprotroph	Undefined Saprotroph
OTU1769	0	0	0	0	0	0	0	0	0	0	0	0	0	1	p__Ascomycota	g__Cistella	Saprotroph	Undefined Saprotroph
OTU1816	0	0	1	0	0	0	0	0	0	0	0	0	0	0	p__Ascomycota	g__Chrysosporium	Saprotroph	Dung Saprotroph-Soil Saprotroph
OTU183	0	0	1	0	0	0	0	0	0	0	0	0	0	0	p__Ascomycota	g__Amauroascus	Saprotroph	Dung Saprotroph-Soil Saprotroph
OTU1963	0	0	0	0	0	0	0	0	1	0	0	0	0	0	p__Ascomycota	g__Bisifusarium	Saprotroph	Undefined Saprotroph
OTU230	0	0	0	0.666667	0	0	0	0	0	0	0.333333	0	0	0	p__Ascomycota	g__unclassified_o__Hypocreales	Saprotroph	Undefined Saprotroph
OTU27	0	1	0	0	0	0	0	0	0	0	0	0	0	0	p__Ascomycota	g__Gibberella	Pathotroph	Plant Pathogen
OTU305	0	0	0	1	0	0	0	0	0	0	0	0	0	0	p__Zygomycota	g__Ramicandelaber	Saprotroph	Undefined Saprotroph
OTU328	0	0	0	1	0	0	0	0	0	0	0	0	0	0	p__Basidiomycota	g__unclassified_f__Boletaceae	Pathotroph-Saprotroph-Symbiotroph	Ectomycorrhizal-Fungal Parasite-Plant Saprotroph-Wood Saprotroph
OTU398	0	0	0	0	1	0	0	0	0	0	0	0	0	0	p__Ascomycota	g__unclassified_o__Hypocreales	Saprotroph	Undefined Saprotroph
OTU423	0	0	0	0	0.666667	0	0	0	0	0	0	0.333333	0	0	p__Ascomycota	g__Sagenomella	Saprotroph	Undefined Saprotroph
OTU438	0	0	0	0	1	0	0	0	0	0	0	0	0	0	p__Basidiomycota	g__Lopharia	Saprotroph	Undefined Saprotroph
OTU44	0	1	0	0	0	0	0	0	0	0	0	0	0	0	p__Ascomycota	g__Acremonium	Pathogen-Saprotroph-Symbiotroph	Animal Pathogen-Endophyte-Fungal Parasite-Plant Pathogen-Wood Saprotroph
OTU457	0	0	0	0	0	1	0	0	0	0	0	0	0	0	p__Ascomycota	g__Curreya	Saprotroph	Undefined Saprotroph
OTU555	0	0	0	0	0	0.666667	0	0.333333	0	0	0	0	0	0	p__Basidiomycota	g__unclassified_o__Tremellales	Pathotroph-Saprotroph-Symbiotroph	Fungal Parasite-Undefined Saprotroph
OTU568	0	0	0	0	0	1	0	0	0	0	0	0	0	0	p__Ascomycota	g__Metarhizium	Pathotroph	Animal Pathogen
OTU587	0	0	0	0	0	1	0	0	0	0	0	0	0	0	p__Ascomycota	g__Preussia	Saprotroph	Dung Saprotroph-Plant Saprotroph
OTU650	0	0	0	1	0	0	0	0	0	0	0	0	0	0	p__Ascomycota	g__unclassified_o__Hypocreales	Saprotroph	Undefined Saprotroph
OTU698	1	0	0	0	0	0	0	0	0	0	0	0	0	0	p__Ascomycota	g__unclassified_f__Gymnoascaceae	Saprotroph	Dung Saprotroph-Plant Saprotroph
OTU785	0	0	0	0	0	0	1	0	0	0	0	0	0	0	p__Basidiomycota	g__Entoloma	Pathotroph-Saprotroph-Symbiotroph	Ectomycorrhizal-Fungal Parasite-Soil Saprotroph-Undefined Saprotroph
OTU82	0	1	0	0	0	0	0	0	0	0	0	0	0	0	p__Glomeromycota	g__Glomus	Symbiotroph	Arbuscular Mycorrhizal
OTU835	0	0	0	0	0	0	1	0	0	0	0	0	0	0	p__Ascomycota	g__Mattirolomyces	Symbiotroph	Ectomycorrhizal
OTU837	0.333333	0	0	0	0	0	0.666667	0	0	0	0	0	0	0	p__Ascomycota	g__Ilyonectria	Saprotroph	Undefined Saprotroph
OTU885	0	0	0	0	0	0	0	1	0	0	0	0	0	0	p__Ascomycota	g__Cladobotryum	Pathotroph	Fungal Parasite
OTU890	0	0	0	0	0	0	0	1	0	0	0	0	0	0	p__Basidiomycota	g__Coriolopsis	Saprotroph	Wood Saprotroph
OTU899	0	0	0	0	0	0	0	0.666667	0	0	0	0.333333	0	0	p__Ascomycota	g__Cirrenalia	Saprotroph	Undefined Saprotroph
OTU942	0	0	0	0	0	0	0	1	0	0	0	0	0	0	p__Basidiomycota	g__unclassified_f__Clavariaceae	Saprotroph-Symbiotroph	Lichenized-Undefined Saprotroph
OTU954	0	0	0	0	0	0	0	1	0	0	0	0	0	0	p__Ascomycota	g__Byssochlamys	Saprotroph	Undefined Saprotroph
OTU959	0	0	0	0	0	0	0	1	0	0	0	0	0	0	p__Ascomycota	g__Thermomyces	Pathotroph-Symbiotroph	Endophyte-Plant Pathogen
OTU967	0	0	0	0	0	0	0	1	0	0	0	0	0	0	p__Ascomycota	g__unclassified_f__Mycosphaerellaceae	Pathotroph-Saprotroph	Plant Pathogen-Undefined Saprotroph
OTU972	0	0	0	0	0	0	0	1	0	0	0	0	0	0	p__Ascomycota	g__Lectera	Pathotroph	Plant Pathogen
OTU993	0	0	0	0	0	0	0	1	0	0	0	0	0	0	p__Ascomycota	g__unclassified_o__Hypocreales	Saprotroph	Undefined Saprotroph
OTU513	0	0	0	0	0	0.666667	0	0	0	0	0	0	0.333333	0	p__unclassified_k__Fungi	g__unclassified_k__Fungi	-	-
OTU1617	0	0	0	0	0	0.333333	0	0	0	0	0	0	0.666667	0	p__unclassified_k__Fungi	g__unclassified_k__Fungi	-	-
OTU907	0	0	0	0	0	0	0	1	0	0	0	0	0	0	p__unclassified_k__Fungi	g__unclassified_k__Fungi	-	-
OTU867	0	0	0	0	0.666667	0	0	0.333333	0	0	0	0	0	0	p__Ascomycota	g__unclassified_p__Ascomycota	-	-
OTU1670	0	0	0	0	0	0	0	0	0	0.333333	0	0	0	0.666667	p__unclassified_k__Fungi	g__unclassified_k__Fungi	-	-
OTU323	0	0	0	0.666667	0	0.333333	0	0	0	0	0	0	0	0	p__Basidiomycota	g__unclassified_o__Malasseziales	-	-
OTU603	0	0	0	0	0	1	0	0	0	0	0	0	0	0	p__unclassified_k__Fungi	g__unclassified_k__Fungi	-	-
OTU1376	0	0	0	0	0	0	0	0	0	0	1	0	0	0	p__unclassified_k__Fungi	g__unclassified_k__Fungi	-	-
OTU913	0	0	0	0	0	0	0	1	0	0	0	0	0	0	p__Ascomycota	g__unclassified_p__Ascomycota	-	-
OTU521	0	0	0	0	0	0.666667	0.333333	0	0	0	0	0	0	0	p__unclassified_k__Fungi	g__unclassified_k__Fungi	-	-
OTU1971	0	0	0	0	0	0	0	1	0	0	0	0	0	0	p__Ascomycota	g__unclassified_p__Ascomycota	-	-
OTU1290	0.333333	0	0	0	0	0	0	0	0	0.666667	0	0	0	0	p__unclassified_k__Fungi	g__unclassified_k__Fungi	-	-
OTU1110	0	0	0	0	0	0	0	0	1	0	0	0	0	0	p__unclassified_k__Fungi	g__unclassified_k__Fungi	-	-
OTU1074	0	0	0	0	0	0	0	0	1	0	0	0	0	0	p__unclassified_k__Fungi	g__unclassified_k__Fungi	-	-
OTU455	0	0	0	0	1	0	0	0	0	0	0	0	0	0	p__unclassified_k__Fungi	g__unclassified_k__Fungi	-	-
OTU1447	0	0	0	0	0	0	0	0	0	0	0	1	0	0	p__Basidiomycota	g__unclassified_o__Agaricales	-	-
OTU904	0	0	0	0	0	0	0	1	0	0	0	0	0	0	p__unclassified_k__Fungi	g__unclassified_k__Fungi	-	-
OTU1332	0	0	0	0	0.333333	0	0	0	0	0	0.666667	0	0	0	p__unclassified_k__Fungi	g__unclassified_k__Fungi	-	-
OTU1142	0	0	0	0	0	0	0	0	0	1	0	0	0	0	p__Ascomycota	g__unclassified_p__Ascomycota	-	-
OTU1025	0	0	0	0	0	0	0	0	1	0	0	0	0	0	p__unclassified_k__Fungi	g__unclassified_k__Fungi	-	-
OTU435	0	0	0	0	1	0	0	0	0	0	0	0	0	0	p__Ascomycota	g__unclassified_o__Pleosporales	-	-
OTU1292	0	0	0	0	0	0	0	0	0	1	0	0	0	0	p__Basidiomycota	g__unclassified_o__Agaricales	-	-
OTU1336	0	0	0	0.333333	0	0	0	0	0	0	0.666667	0	0	0	p__unclassified_k__Fungi	g__unclassified_k__Fungi	-	-
OTU866	0	0	0	0	0	0	0	0.666667	0	0	0	0.333333	0	0	p__unclassified_k__Fungi	g__unclassified_k__Fungi	-	-
OTU1828	0	0	0	0	0	0	0	1	0	0	0	0	0	0	p__unclassified_k__Fungi	g__unclassified_k__Fungi	-	-
OTU1529	0	0	0	0	0	0	0	0	0	0	0	1	0	0	p__unclassified_k__Fungi	g__unclassified_k__Fungi	-	-
OTU983	0	0	0	0	0	0	0	1	0	0	0	0	0	0	p__unclassified_k__Fungi	g__unclassified_k__Fungi	-	-
OTU765	1	0	0	0	0	0	0	0	0	0	0	0	0	0	p__unclassified_k__Fungi	g__unclassified_k__Fungi	-	-
OTU879	0	0	0	0	0	0	0	1	0	0	0	0	0	0	p__unclassified_k__Fungi	g__unclassified_k__Fungi	-	-
OTU1642	0	0	0	0	0	0	0	0	0	0	0	0	1	0	p__unclassified_k__Fungi	g__unclassified_k__Fungi	-	-
OTU1483	0	0.333333	0	0	0	0	0	0	0	0	0	0.666667	0	0	p__unclassified_k__Fungi	g__unclassified_k__Fungi	-	-
OTU924	0	0	0	0	0	0	0	1	0	0	0	0	0	0	p__Ascomycota	g__unclassified_o__Myriangiales	-	-
OTU94	0	1	0	0	0	0	0	0	0	0	0	0	0	0	p__unclassified_k__Fungi	g__unclassified_k__Fungi	-	-
OTU369	0	0	0	1	0	0	0	0	0	0	0	0	0	0	p__unclassified_k__Fungi	g__unclassified_k__Fungi	-	-
OTU917	0	0	0	0	0	0	0	1	0	0	0	0	0	0	p__unclassified_k__Fungi	g__unclassified_k__Fungi	-	-
OTU509	0	0	0	0	0	1	0	0	0	0	0	0	0	0	p__unclassified_k__Fungi	g__unclassified_k__Fungi	-	-
OTU673	0.666667	0	0	0	0	0	0	0	0.333333	0	0	0	0	0	p__Ascomycota	g__unclassified_p__Ascomycota	-	-
OTU1187	0	0	0	0	0	0	0	0	0	1	0	0	0	0	p__Ascomycota	g__unclassified_c__Sordariomycetes	-	-
OTU788	0	0	0	0	0	0	1	0	0	0	0	0	0	0	p__Ascomycota	g__unclassified_p__Ascomycota	-	-
OTU336	0	0	0	1	0	0	0	0	0	0	0	0	0	0	p__unclassified_k__Fungi	g__unclassified_k__Fungi	-	-
OTU125	0	1	0	0	0	0	0	0	0	0	0	0	0	0	p__Ascomycota	g__unclassified_p__Ascomycota	-	-
OTU354	0	0	0	1	0	0	0	0	0	0	0	0	0	0	p__Ascomycota	g__unclassified_p__Ascomycota	-	-
OTU1138	0	0	0	0	0	0	0	0	0	1	0	0	0	0	p__Ascomycota	g__unclassified_p__Ascomycota	-	-
OTU1318	0	0	0	0	0	0	0	0	0	1	0	0	0	0	p__Basidiomycota	g__Kondoa	-	-
OTU1358	0	0	0	0	0	0	0	0	0	0	1	0	0	0	p__unclassified_k__Fungi	g__unclassified_k__Fungi	-	-
OTU2033	0	0	0	1	0	0	0	0	0	0	0	0	0	0	p__Ascomycota	g__unclassified_p__Ascomycota	-	-
OTU1357	0	0	0	0	0	0	0	0	0	0	1	0	0	0	p__Basidiomycota	g__unclassified_c__Agaricomycetes	-	-
OTU117	0	1	0	0	0	0	0	0	0	0	0	0	0	0	p__unclassified_k__Fungi	g__unclassified_k__Fungi	-	-
OTU172	0	0	1	0	0	0	0	0	0	0	0	0	0	0	p__Ascomycota	g__unclassified_c__Sordariomycetes	-	-
OTU539	0	0	0	0	0	1	0	0	0	0	0	0	0	0	p__unclassified_k__Fungi	g__unclassified_k__Fungi	-	-
OTU747	1	0	0	0	0	0	0	0	0	0	0	0	0	0	p__Ascomycota	g__unclassified_p__Ascomycota	-	-
OTU1337	0.333333	0	0.666667	0	0	0	0	0	0	0	0	0	0	0	p__Ascomycota	g__unclassified_p__Ascomycota	-	-
OTU1453	0	0	0	0	0	0	0	0	0	0	0.333333	0.666667	0	0	p__unclassified_k__Fungi	g__unclassified_k__Fungi	-	-
OTU171	0	0	0.333333	0	0	0	0	0	0.666667	0	0	0	0	0	p__Ascomycota	g__unclassified_c__Eurotiomycetes	-	-
OTU62	0	1	0	0	0	0	0	0	0	0	0	0	0	0	p__unclassified_k__Fungi	g__unclassified_k__Fungi	-	-
OTU1612	0.333333	0	0	0	0	0	0	0	0	0	0	0	0.666667	0	p__Ascomycota	g__unclassified_o__Pleosporales	-	-
OTU215	0	0	0	0.666667	0.333333	0	0	0	0	0	0	0	0	0	p__Ascomycota	g__Pseudorobillarda	-	-
OTU346	0	0	0	1	0	0	0	0	0	0	0	0	0	0	p__unclassified_k__Fungi	g__unclassified_k__Fungi	-	-
OTU148	0	0	1	0	0	0	0	0	0	0	0	0	0	0	p__Ascomycota	g__unclassified_p__Ascomycota	-	-
OTU1325	0	0	0	0	0	0	0	0	0	0	0.333333	0	0	0.666667	p__unclassified_k__Fungi	g__unclassified_k__Fungi	-	-
OTU1592	0	0	0	0	0	0	0	0	0	0	0	0	1	0	p__Basidiomycota	g__unclassified_o__Polyporales	-	-
OTU827	0	0	0	0	0	0	1	0	0	0	0	0	0	0	p__unclassified_k__Fungi	g__unclassified_k__Fungi	-	-
OTU612	0	0	0	0	0	1	0	0	0	0	0	0	0	0	p__unclassified_k__Fungi	g__unclassified_k__Fungi	-	-
OTU1470	0	0	0	0	0	0	0	0	0	0	0	1	0	0	p__Ascomycota	g__Shiraia	-	-
OTU1408	0	0	0	0	0	0	0	0	0	0	1	0	0	0	p__unclassified_k__Fungi	g__unclassified_k__Fungi	-	-
OTU1421	0	0	0.333333	0.333333	0	0	0	0	0	0	0.333333	0	0	0	p__Chytridiomycota	g__Powellomyces	Pathotroph	Plant Pathogen
OTU1542	0	0	0	0	0	0.333333	0	0.333333	0	0	0	0	0.333333	0	p__Ascomycota	g__unclassified_f__Herpotrichiellaceae	Pathotroph-Saprotroph	Animal Pathogen-Fungal Parasite-Undefined Saprotroph
OTU302	0	0	0	0.333333	0	0	0	0	0	0.333333	0.333333	0	0	0	p__Ascomycota	g__Acremonium	Pathogen-Saprotroph-Symbiotroph	Animal Pathogen-Endophyte-Fungal Parasite-Plant Pathogen-Wood Saprotroph
OTU784	0	0	0	0	0	0	0.333333	0.333333	0	0	0	0	0.333333	0	p__Ascomycota	g__unclassified_o__Hypocreales	Saprotroph	Undefined Saprotroph
OTU2003	0	0.333333	0	0	0	0	0	0.333333	0	0	0.333333	0	0	0	p__unclassified_k__Fungi	g__unclassified_k__Fungi	-	-
OTU1859	0.333333	0	0	0	0	0	0	0.333333	0	0	0	0	0.333333	0	p__Ascomycota	g__unclassified_o__Microascales	-	-
OTU1026	0	0	0	0	0	0	0	0	0.666667	0	0	0	0	0	p__Ascomycota	g__Myxotrichum	Saprotroph-Symbiotroph	Dung Saprotroph-Ericoid Mycorrhizal-Lichenized
OTU1053	0	0	0	0	0	0	0	0	0.666667	0	0	0	0	0	p__Basidiomycota	g__Pluteus	Pathotroph-Saprotroph	Bryophyte Parasite-Litter Saprotroph-Wood Saprotroph
OTU1060	0	0	0	0	0	0	0	0	0.666667	0	0	0	0	0	p__Ascomycota	g__Thielavia	Saprotroph	Dung Saprotroph-Undefined Saprotroph
OTU1076	0	0	0	0	0	0	0	0	0.666667	0	0	0	0	0	p__Ascomycota	g__Paraconiothyrium	Saprotroph	Undefined Saprotroph
OTU1106	0	0	0	0	0	0	0	0	0.666667	0	0	0	0	0	p__Ascomycota	g__unclassified_f__Chaetomiaceae	Pathotroph-Saprotroph-Symbiotroph	Animal Pathogen-Dung Saprotroph-Endophyte-Epiphyte-Plant Saprotroph-Wood Saprotroph
OTU1117	0	0	0	0	0	0	0	0	0	0.666667	0	0	0	0	p__Basidiomycota	g__Melanoleuca	Saprotroph	Soil Saprotroph
OTU1179	0	0	0	0	0	0	0	0	0	0.666667	0	0	0	0	p__Ascomycota	g__Aspergillus	Saprotroph	Undefined Saprotroph
OTU119	0	0.666667	0	0	0	0	0	0	0	0	0	0	0	0	p__Ascomycota	g__Meyerozyma	Saprotroph	Undefined Saprotroph
OTU1190	0	0	0	0	0	0	0	0	0	0.666667	0	0	0	0	p__Basidiomycota	g__Rhodotorula	Pathotroph-Saprotroph	Animal Endosymbiont-Animal Pathogen-Endophyte-Plant Pathogen-Undefined Saprotroph
OTU1211	0	0	0	0	0	0	0	0	0	0.666667	0	0	0	0	p__Ascomycota	g__Monosporascus	Pathotroph	Plant Pathogen
OTU1263	0	0	0	0	0	0	0	0	0	0.666667	0	0	0	0	p__Basidiomycota	g__Sporobolomyces	Pathotroph-Saprotroph	Fungal Parasite-Litter Saprotroph
OTU1270	0	0	0	0	0	0	0	0	0	0.666667	0	0	0	0	p__Ascomycota	g__Venturia	Pathotroph	Plant Pathogen
OTU1302	0	0	0	0	0	0	0	0	0	0.666667	0	0	0	0	p__Ascomycota	g__Paraconiothyrium	Saprotroph	Undefined Saprotroph
OTU1347	0	0	0	0	0	0	0	0	0	0	0.666667	0	0	0	p__Ascomycota	g__Gibberella	Pathotroph	Plant Pathogen
OTU1356	0	0	0	0	0	0	0	0	0	0	0.666667	0	0	0	p__Ascomycota	g__Preussia	Saprotroph	Dung Saprotroph-Plant Saprotroph
OTU1364	0	0	0	0	0	0	0	0	0	0	0.666667	0	0	0	p__Basidiomycota	g__Cortinarius	Symbiotroph	Ectomycorrhizal
OTU1457	0	0	0	0	0	0	0	0	0	0	0	0.666667	0	0	p__Ascomycota	g__Rhizopycnis	Pathotroph-Symbiotroph	Endophyte-Plant Pathogen
OTU1491	0	0	0	0	0	0	0	0	0	0	0	0.666667	0	0	p__Ascomycota	g__Pleospora	Pathotroph-Saprotroph	Endophyte-Lichen Parasite-Plant Pathogen-Undefined Saprotroph
OTU1493	0	0	0	0	0	0	0	0	0	0	0	0.666667	0	0	p__Ascomycota	g__Chaetomium	Pathotroph-Saprotroph-Symbiotroph	Animal Pathogen-Dung Saprotroph-Endophyte-Epiphyte-Plant Saprotroph-Wood Saprotroph
OTU150	0	0	0.666667	0	0	0	0	0	0	0	0	0	0	0	p__Ascomycota	g__unclassified_f__Nectriaceae	Saprotroph	Undefined Saprotroph
OTU1501	0	0	0	0	0	0	0	0	0	0	0	0.666667	0	0	p__Ascomycota	g__Uwebraunia	Saprotroph	Undefined Saprotroph
OTU1573	0	0	0	0	0	0	0	0	0	0	0	0	0.666667	0	p__Ascomycota	g__Curvularia	Pathotroph	Plant Pathogen
OTU168	0	0	0.666667	0	0	0	0	0	0	0	0	0	0	0	p__Ascomycota	g__Candida	Saprotroph	Undefined Saprotroph
OTU1691	0	0	0	0	0	0	0	0	0	0	0	0	0	0.666667	p__Ascomycota	g__Monosporascus	Pathotroph	Plant Pathogen
OTU177	0	0	0.666667	0	0	0	0	0	0	0	0	0	0	0	p__Ascomycota	g__Fusicolla	Saprotroph	Undefined Saprotroph
OTU1782	0	0	0	0	0	0	0	0	0	0	0	0	0	0.666667	p__Basidiomycota	g__Malassezia	Pathotroph-Saprotroph	Animal Pathogen-Undefined Saprotroph
OTU1815	0	0	0	0.666667	0	0	0	0	0	0	0	0	0	0	p__Ascomycota	g__Acremonium	Pathogen-Saprotroph-Symbiotroph	Animal Pathogen-Endophyte-Fungal Parasite-Plant Pathogen-Wood Saprotroph
OTU1894	0	0	0	0	0	0.666667	0	0	0	0	0	0	0	0	p__Ascomycota	g__Preussia	Saprotroph	Dung Saprotroph-Plant Saprotroph
OTU2002	0	0	0	0	0	0	0	0.666667	0	0	0	0	0	0	p__Ascomycota	g__Cephalotheca	Saprotroph	Undefined Saprotroph
OTU220	0	0	0	0.666667	0	0	0	0	0	0	0	0	0	0	p__Ascomycota	g__Alternaria	Pathotroph-Saprotroph-Symbiotroph	Animal Pathogen-Endophyte-Plant Pathogen-Wood Saprotroph
OTU257	0	0	0	0.666667	0	0	0	0	0	0	0	0	0	0	p__Ascomycota	g__unclassified_f__Pezizaceae	Saprotroph-Symbiotroph	Dung Saprotroph-Ectomycorrhizal-Litter Saprotroph-Undefined Saprotroph
OTU334	0	0	0	0.666667	0	0	0	0	0	0	0	0	0	0	p__Ascomycota	g__Geopora	Symbiotroph	Ectomycorrhizal
OTU34	0	0.666667	0	0	0	0	0	0	0	0	0	0	0	0	p__Basidiomycota	g__Tomentella	Symbiotroph	Ectomycorrhizal
OTU343	0	0	0	0.666667	0	0	0	0	0	0	0	0	0	0	p__Ascomycota	g__Tetracladium	Saprotroph	Undefined Saprotroph
OTU361	0	0	0	0.666667	0	0	0	0	0	0	0	0	0	0	p__Ascomycota	g__unclassified_f__Sporormiaceae	Saprotroph	Dung Saprotroph-Plant Saprotroph
OTU375	0	0	0	0.666667	0	0	0	0	0	0	0	0	0	0	p__Ascomycota	g__unclassified_o__Hypocreales	Saprotroph	Undefined Saprotroph
OTU385	0	0	0	0	0.666667	0	0	0	0	0	0	0	0	0	p__Zygomycota	g__Mortierella	Saprotroph-Symbiotroph	Endophyte-Litter Saprotroph-Soil Saprotroph-Undefined Saprotroph
OTU397	0	0	0	0	0.666667	0	0	0	0	0	0	0	0	0	p__Ascomycota	g__Cladosporium	Pathotroph-Saprotroph-Symbiotroph	Animal Pathogen-Endophyte-Lichen Parasite-Plant Pathogen-Wood Saprotroph
OTU432	0	0	0	0	0.666667	0	0	0	0	0	0	0	0	0	p__Ascomycota	g__unclassified_f__Lasiosphaeriaceae	Saprotroph	Undefined Saprotroph
OTU493	0	0	0	0	0	0.666667	0	0	0	0	0	0	0	0	p__Basidiomycota	g__Clavulinopsis	Saprotroph	Undefined Saprotroph
OTU54	0	0.666667	0	0	0	0	0	0	0	0	0	0	0	0	p__Ascomycota	g__unclassified_o__Hypocreales	Saprotroph	Undefined Saprotroph
OTU616	0	0	0	0	0	0.666667	0	0	0	0	0	0	0	0	p__Ascomycota	g__unclassified_f__Sporormiaceae	Saprotroph	Dung Saprotroph-Plant Saprotroph
OTU672	0.666667	0	0	0	0	0	0	0	0	0	0	0	0	0	p__Basidiomycota	g__Cryptococcus	Pathotroph-Saprotroph-Symbiotroph	Fungal Parasite-Undefined Saprotroph
OTU69	0	0.666667	0	0	0	0	0	0	0	0	0	0	0	0	p__Basidiomycota	g__Conocybe	Saprotroph	Undefined Saprotroph
OTU695	0.666667	0	0	0	0	0	0	0	0	0	0	0	0	0	p__Ascomycota	g__Microascus	Pathotroph-Saprotroph-Symbiotroph	Animal Pathogen-Endophyte-Plant Pathogen-Undefined Saprotroph
OTU728	0.666667	0	0	0	0	0	0	0	0	0	0	0	0	0	p__Ascomycota	g__Coniella	Pathotroph	Plant Pathogen
OTU76	0	0.666667	0	0	0	0	0	0	0	0	0	0	0	0	p__Basidiomycota	g__Stereum	Saprotroph	Undefined Saprotroph
OTU8	0	0.666667	0	0	0	0	0	0	0	0	0	0	0	0	p__Ascomycota	g__Phaeococcomyces	Saprotroph	Undefined Saprotroph
OTU806	0	0	0	0	0	0	0.666667	0	0	0	0	0	0	0	p__Ascomycota	g__Candida	Saprotroph	Undefined Saprotroph
OTU84	0	0.666667	0	0	0	0	0	0	0	0	0	0	0	0	p__Basidiomycota	g__Volvariella	Saprotroph	Undefined Saprotroph
OTU868	0	0	0	0	0	0	0	0.666667	0	0	0	0	0	0	p__Ascomycota	g__unclassified_f__Nectriaceae	Saprotroph	Undefined Saprotroph
OTU87	0	0.666667	0	0	0	0	0	0	0	0	0	0	0	0	p__Ascomycota	g__unclassified_f__Rhytismataceae	Pathotroph-Saprotroph-Symbiotroph	Endophyte-Leaf Saprotroph-Plant Pathogen
OTU882	0	0	0	0	0	0	0	0.666667	0	0	0	0	0	0	p__Basidiomycota	g__Ceriporia	Saprotroph	Wood Saprotroph
OTU900	0	0	0	0	0	0	0	0.666667	0	0	0	0	0	0	p__Ascomycota	g__Sarocladium	Saprotroph	Undefined Saprotroph
OTU941	0	0	0	0	0	0	0	0.666667	0	0	0	0	0	0	p__Ascomycota	g__Ascochyta	Pathotroph	Plant Pathogen
OTU1692	0	0	0	0	0	0	0	0	0	0	0	0	0	0.666667	p__unclassified_k__Fungi	g__unclassified_k__Fungi	-	-
OTU219	0	0	0	0.666667	0	0	0	0	0	0	0	0	0	0	p__unclassified_k__Fungi	g__unclassified_k__Fungi	-	-
OTU65	0	0.666667	0	0	0	0	0	0	0	0	0	0	0	0	p__unclassified_k__Fungi	g__unclassified_k__Fungi	-	-
OTU1912	0	0	0	0	0	0	0	0	0	0	0	0.666667	0	0	p__unclassified_k__Fungi	g__unclassified_k__Fungi	-	-
OTU1415	0	0	0	0	0	0	0	0	0	0	0.666667	0	0	0	p__unclassified_k__Fungi	g__unclassified_k__Fungi	-	-
OTU1041	0	0	0	0	0	0	0	0	0.666667	0	0	0	0	0	p__unclassified_k__Fungi	g__unclassified_k__Fungi	-	-
OTU1810	0	0	0	0	0	0	0	0.666667	0	0	0	0	0	0	p__Ascomycota	g__unclassified_o__Sordariales	-	-
OTU749	0.666667	0	0	0	0	0	0	0	0	0	0	0	0	0	p__unclassified_k__Fungi	g__unclassified_k__Fungi	-	-
OTU68	0	0.666667	0	0	0	0	0	0	0	0	0	0	0	0	p__unclassified_k__Fungi	g__unclassified_k__Fungi	-	-
OTU371	0	0	0	0.666667	0	0	0	0	0	0	0	0	0	0	p__Ascomycota	g__unclassified_c__Sordariomycetes	-	-
OTU1537	0	0	0	0	0	0	0	0	0	0	0	0.666667	0	0	p__unclassified_k__Fungi	g__unclassified_k__Fungi	-	-
OTU1763	0	0	0	0	0	0	0	0	0	0	0	0	0	0.666667	p__unclassified_k__Fungi	g__unclassified_k__Fungi	-	-
OTU1045	0	0	0	0	0	0	0	0	0.666667	0	0	0	0	0	p__unclassified_k__Fungi	g__unclassified_k__Fungi	-	-
OTU1096	0	0	0	0	0	0	0	0	0.666667	0	0	0	0	0	p__unclassified_k__Fungi	g__unclassified_k__Fungi	-	-
OTU986	0	0	0	0	0	0	0	0.666667	0	0	0	0	0	0	p__unclassified_k__Fungi	g__unclassified_k__Fungi	-	-
OTU964	0	0	0	0	0	0	0	0.666667	0	0	0	0	0	0	p__Ascomycota	g__unclassified_p__Ascomycota	-	-
OTU335	0	0	0	0.666667	0	0	0	0	0	0	0	0	0	0	p__unclassified_k__Fungi	g__unclassified_k__Fungi	-	-
OTU1193	0	0	0	0	0	0	0	0	0	0.666667	0	0	0	0	p__unclassified_k__Fungi	g__unclassified_k__Fungi	-	-
OTU500	0	0	0	0	0	0.666667	0	0	0	0	0	0	0	0	p__unclassified_k__Fungi	g__unclassified_k__Fungi	-	-
OTU1090	0	0	0	0	0	0	0	0	0.666667	0	0	0	0	0	p__Basidiomycota	g__unclassified_o__Sebacinales	-	-
OTU1267	0	0	0	0	0	0	0	0	0	0.666667	0	0	0	0	p__Ascomycota	g__unclassified_p__Ascomycota	-	-
OTU1901	0	0	0	0	0	0	0	0.666667	0	0	0	0	0	0	p__unclassified_k__Fungi	g__unclassified_k__Fungi	-	-
OTU1182	0	0	0	0	0	0	0	0	0	0.666667	0	0	0	0	p__Ascomycota	g__unclassified_o__Pleosporales	-	-
OTU1247	0	0	0	0	0	0	0	0	0	0.666667	0	0	0	0	p__Ascomycota	g__unclassified_p__Ascomycota	-	-
OTU1664	0	0	0	0	0	0	0	0	0	0	0	0	0	0.666667	p__Basidiomycota	g__unclassified_o__Polyporales	-	-
OTU1866	0	0	0	0	0	0	0	0	0	0	0.666667	0	0	0	p__unclassified_k__Fungi	g__unclassified_k__Fungi	-	-
OTU944	0	0	0	0	0	0	0	0.666667	0	0	0	0	0	0	p__unclassified_k__Fungi	g__unclassified_k__Fungi	-	-
OTU101	0	0.666667	0	0	0	0	0	0	0	0	0	0	0	0	p__Ascomycota	g__unclassified_o__Pleosporales	-	-
OTU1258	0	0	0	0	0	0	0	0	0	0.666667	0	0	0	0	p__unclassified_k__Fungi	g__unclassified_k__Fungi	-	-
OTU1848	0	0	0	0	0	0	0	0	0	0	0.666667	0	0	0	p__unclassified_k__Fungi	g__unclassified_k__Fungi	-	-
OTU260	0	0	0	0.666667	0	0	0	0	0	0	0	0	0	0	p__unclassified_k__Fungi	g__unclassified_k__Fungi	-	-
OTU1845	0	0	0.666667	0	0	0	0	0	0	0	0	0	0	0	p__unclassified_k__Fungi	g__unclassified_k__Fungi	-	-
OTU1181	0	0	0	0	0	0	0	0	0	0.666667	0	0	0	0	p__unclassified_k__Fungi	g__unclassified_k__Fungi	-	-
OTU903	0	0.666667	0	0	0	0	0	0	0	0	0	0	0	0	p__Ascomycota	g__unclassified_o__Onygenales	-	-
OTU937	0	0	0	0	0	0	0	0.666667	0	0	0	0	0	0	p__unclassified_k__Fungi	g__unclassified_k__Fungi	-	-
OTU1365	0	0	0	0	0	0	0	0	0	0	0.666667	0	0	0	p__Ascomycota	g__unclassified_p__Ascomycota	-	-
OTU1745	0	0	0	0	0	0	0	0	0	0	0	0	0	0.666667	p__unclassified_k__Fungi	g__unclassified_k__Fungi	-	-
OTU209	0	0	0	0.666667	0	0	0	0	0	0	0	0	0	0	p__unclassified_k__Fungi	g__unclassified_k__Fungi	-	-
OTU789	0	0	0	0	0	0	0.666667	0	0	0	0	0	0	0	p__unclassified_k__Fungi	g__unclassified_k__Fungi	-	-
OTU176	0	0	0.666667	0	0	0	0	0	0	0	0	0	0	0	p__unclassified_k__Fungi	g__unclassified_k__Fungi	-	-
OTU1899	0	0	0	0	0	0	0	0.666667	0	0	0	0	0	0	p__Basidiomycota	g__unclassified_c__Agaricomycetes	-	-
OTU1089	0	0	0	0	0	0	0	0	0.666667	0	0	0	0	0	p__unclassified_k__Fungi	g__unclassified_k__Fungi	-	-
OTU598	0	0	0	0	0	0.666667	0	0	0	0	0	0	0	0	p__Ascomycota	g__unclassified_c__Eurotiomycetes	-	-
OTU24	0	0.666667	0	0	0	0	0	0	0	0	0	0	0	0	p__unclassified_k__Fungi	g__unclassified_k__Fungi	-	-
OTU1440	0	0	0	0	0	0	0	0	0	0	0	0.666667	0	0	p__unclassified_k__Fungi	g__unclassified_k__Fungi	-	-
OTU1132	0	0	0	0	0	0	0	0	0	0.666667	0	0	0	0	p__unclassified_k__Fungi	g__unclassified_k__Fungi	-	-
OTU4	0	0.666667	0	0	0	0	0	0	0	0	0	0	0	0	p__unclassified_k__Fungi	g__unclassified_k__Fungi	-	-
OTU634	0	0	0	0	0	0.666667	0	0	0	0	0	0	0	0	p__unclassified_k__Fungi	g__unclassified_k__Fungi	-	-
OTU1940	0	0	0	0.666667	0	0	0	0	0	0	0	0	0	0	p__unclassified_k__Fungi	g__unclassified_k__Fungi	-	-
OTU357	0	0	0	0.666667	0	0	0	0	0	0	0	0	0	0	p__Ascomycota	g__unclassified_p__Ascomycota	-	-
OTU1391	0	0	0	0	0	0	0	0	0	0	0.666667	0	0	0	p__unclassified_k__Fungi	g__unclassified_k__Fungi	-	-
OTU1775	0	0	0	0	0	0	0	0	0	0	0	0	0	0.666667	p__unclassified_k__Fungi	g__unclassified_k__Fungi	-	-
OTU1622	0	0	0	0	0	0	0	0	0	0	0	0	0.666667	0	p__unclassified_k__Fungi	g__unclassified_k__Fungi	-	-
OTU370	0	0	0	0.666667	0	0	0	0	0	0	0	0	0	0	p__unclassified_k__Fungi	g__unclassified_k__Fungi	-	-
OTU929	0	0	0	0	0	0	0	0.666667	0	0	0	0	0	0	p__unclassified_k__Fungi	g__unclassified_k__Fungi	-	-
OTU1288	0	0	0	0	0	0	0	0	0	0.666667	0	0	0	0	p__unclassified_k__Fungi	g__unclassified_k__Fungi	-	-
OTU420	0	0	0	0	0.666667	0	0	0	0	0	0	0	0	0	p__Ascomycota	g__unclassified_c__Sordariomycetes	-	-
OTU1291	0	0	0	0	0	0	0	0	0	0.666667	0	0	0	0	p__Basidiomycota	g__unclassified_c__Tremellomycetes	-	-
OTU352	0	0	0	0.666667	0	0	0	0	0	0	0	0	0	0	p__unclassified_k__Fungi	g__unclassified_k__Fungi	-	-
OTU315	0	0	0	0.666667	0	0	0	0	0	0	0	0	0	0	p__Ascomycota	g__unclassified_c__Sordariomycetes	-	-
OTU1424	0	0	0	0	0	0	0	0	0	0	0.666667	0	0	0	p__unclassified_k__Fungi	g__unclassified_k__Fungi	-	-
OTU193	0	0	0	0.666667	0	0	0	0	0	0	0	0	0	0	p__Ascomycota	g__unclassified_p__Ascomycota	-	-
OTU451	0	0	0	0	0.666667	0	0	0	0	0	0	0	0	0	p__unclassified_k__Fungi	g__unclassified_k__Fungi	-	-
OTU791	0	0	0	0	0	0	0.666667	0	0	0	0	0	0	0	p__Ascomycota	g__unclassified_o__Sordariales	-	-
OTU1456	0	0	0	0	0	0	0	0	0	0	0	0.666667	0	0	p__Ascomycota	g__unclassified_c__Sordariomycetes	-	-
OTU327	0	0	0	0.666667	0	0	0	0	0	0	0	0	0	0	p__Ascomycota	g__unclassified_p__Ascomycota	-	-
OTU1242	0	0	0	0	0	0	0	0	0	0.666667	0	0	0	0	p__unclassified_k__Fungi	g__unclassified_k__Fungi	-	-
OTU1606	0	0	0	0	0	0	0	0	0	0	0	0	0.666667	0	p__unclassified_k__Fungi	g__unclassified_k__Fungi	-	-
OTU1746	0	0	0	0	0	0	0	0	0	0	0	0	0	0.666667	p__Ascomycota	g__unclassified_p__Ascomycota	-	-
OTU1502	0	0	0	0	0	0	0	0	0	0.333333	0	0.333333	0	0	p__Ascomycota	g__Articulospora	Saprotroph	Undefined Saprotroph
OTU163	0	0	0.333333	0	0	0.333333	0	0	0	0	0	0	0	0	p__Ascomycota	g__unclassified_o__Hypocreales	Saprotroph	Undefined Saprotroph
OTU1818	0	0.333333	0	0	0	0	0	0	0	0	0	0.333333	0	0	p__Ascomycota	g__Acremonium	Pathogen-Saprotroph-Symbiotroph	Animal Pathogen-Endophyte-Fungal Parasite-Plant Pathogen-Wood Saprotroph
OTU1852	0	0	0	0	0	0	0	0	0	0.333333	0	0	0	0.333333	p__Ascomycota	g__Debaryomyces	Saprotroph	Undefined Saprotroph
OTU410	0	0	0	0	0.333333	0	0	0	0	0	0	0.333333	0	0	p__Ascomycota	g__Aspergillus	Saprotroph	Undefined Saprotroph
OTU554	0	0.333333	0	0	0	0.333333	0	0	0	0	0	0	0	0	p__Ascomycota	g__unclassified_f__Nectriaceae	Saprotroph	Undefined Saprotroph
OTU675	0.333333	0	0	0	0	0	0	0	0	0	0.333333	0	0	0	p__Ascomycota	g__Paraphaeosphaeria	Saprotroph	Undefined Saprotroph
OTU910	0	0	0	0	0.333333	0	0	0.333333	0	0	0	0	0	0	p__Basidiomycota	g__Hapalopilus	Saprotroph	Wood Saprotroph
OTU962	0	0	0	0	0	0	0	0.333333	0	0	0	0	0	0.333333	p__Ascomycota	g__Arachnomyces	Saprotroph	Dung Saprotroph
OTU407	0	0	0	0.333333	0.333333	0	0	0	0	0	0	0	0	0	p__Ascomycota	g__unclassified_p__Ascomycota	-	-
OTU1764	0	0	0	0	0	0	0	0	0	0	0.333333	0	0	0.333333	p__unclassified_k__Fungi	g__unclassified_k__Fungi	-	-
OTU1320	0	0	0	0	0	0	0	0.333333	0	0	0.333333	0	0	0	p__unclassified_k__Fungi	g__unclassified_k__Fungi	-	-
OTU1844	0	0.333333	0	0	0	0	0	0	0.333333	0	0	0	0	0	p__unclassified_k__Fungi	g__unclassified_k__Fungi	-	-
OTU284	0	0	0.333333	0.333333	0	0	0	0	0	0	0	0	0	0	p__Ascomycota	g__unclassified_p__Ascomycota	-	-
OTU1553	0	0.333333	0	0	0	0	0	0	0	0	0	0	0.333333	0	p__unclassified_k__Fungi	g__unclassified_k__Fungi	-	-
OTU153	0	0	0.333333	0	0	0	0	0	0	0	0.333333	0	0	0	p__unclassified_k__Fungi	g__unclassified_k__Fungi	-	-
OTU776	0	0	0	0	0.333333	0	0.333333	0	0	0	0	0	0	0	p__unclassified_k__Fungi	g__unclassified_k__Fungi	-	-
OTU1472	0	0	0	0	0.333333	0	0	0	0	0	0	0.333333	0	0	p__unclassified_k__Fungi	g__unclassified_k__Fungi	-	-
OTU271	0	0	0	0.333333	0	0.333333	0	0	0	0	0	0	0	0	p__unclassified_k__Fungi	g__unclassified_k__Fungi	-	-
OTU57	0	0.333333	0	0.333333	0	0	0	0	0	0	0	0	0	0	p__Ascomycota	g__unclassified_c__Dothideomycetes	-	-
OTU1427	0	0	0	0	0	0	0	0	0	0	0.333333	0	0	0.333333	p__unclassified_k__Fungi	g__unclassified_k__Fungi	-	-
OTU1034	0	0	0	0	0	0	0	0	0.333333	0	0	0	0	0	p__Ascomycota	g__Darksidea	Symbiotroph	Endophyte
OTU1220	0	0	0	0	0	0	0	0	0	0.333333	0	0	0	0	p__Basidiomycota	g__Trechispora	Saprotroph	Wood Saprotroph
OTU1226	0	0	0	0	0	0	0	0	0	0.333333	0	0	0	0	p__Basidiomycota	g__Bensingtonia	Saprotroph	Undefined Saprotroph
OTU1289	0	0	0	0	0	0	0	0	0	0.333333	0	0	0	0	p__Ascomycota	g__Setophaeosphaeria	Pathotroph-Saprotroph	Fungal Parasite-Plant Pathogen-Plant Saprotroph
OTU1717	0.333333	0	0	0	0	0	0	0	0	0	0	0	0	0	p__Ascomycota	g__Testudomyces	Saprotroph	Undefined Saprotroph
OTU1819	0	0	0	0	0	0	0	0	0	0.333333	0	0	0	0	p__Basidiomycota	g__Trametes	Saprotroph	Wood Saprotroph
OTU1837	0	0.333333	0	0	0	0	0	0	0	0	0	0	0	0	p__Basidiomycota	g__Trechispora	Saprotroph	Wood Saprotroph
OTU1853	0	0	0	0	0	0	0	0.333333	0	0	0	0	0	0	p__Ascomycota	g__Dichotomomyces	Saprotroph	Undefined Saprotroph
OTU1875	0	0	0	0.333333	0	0	0	0	0	0	0	0	0	0	p__Basidiomycota	g__Hyphodermella	Saprotroph	Undefined Saprotroph
OTU192	0	0	0	0.333333	0	0	0	0	0	0	0	0	0	0	p__Basidiomycota	g__Inocybe	Symbiotroph	Ectomycorrhizal
OTU1959	0	0	0	0	0	0	0	0	0	0	0	0.333333	0	0	p__Basidiomycota	g__Conocybe	Saprotroph	Undefined Saprotroph
OTU2020	0	0	0	0	0	0.333333	0	0	0	0	0	0	0	0	p__Ascomycota	g__Acremonium	Pathogen-Saprotroph-Symbiotroph	Animal Pathogen-Endophyte-Fungal Parasite-Plant Pathogen-Wood Saprotroph
OTU2023	0	0	0	0	0	0	0	0	0.333333	0	0	0	0	0	p__Ascomycota	g__Sporothrix	Pathotroph-Saprotroph-Symbiotroph	Animal Pathogen-Endophyte-Plant Saprotroph-Soil Saprotroph
OTU320	0	0	0	0.333333	0	0	0	0	0	0	0	0	0	0	p__Basidiomycota	g__unclassified_f__Thelephoraceae	Saprotroph-Symbiotroph	Ectomycorrhizal-Undefined Saprotroph
OTU347	0	0	0	0.333333	0	0	0	0	0	0	0	0	0	0	p__Zygomycota	g__Mortierella	Saprotroph-Symbiotroph	Endophyte-Litter Saprotroph-Soil Saprotroph-Undefined Saprotroph
OTU365	0	0	0	0.333333	0	0	0	0	0	0	0	0	0	0	p__Basidiomycota	g__Coprinellus	Saprotroph	Dung Saprotroph-Plant Saprotroph-Wood Saprotroph
OTU450	0	0	0	0	0.333333	0	0	0	0	0	0	0	0	0	p__Ascomycota	g__Phialophora	Pathotroph-Saprotroph-Symbiotroph	Animal Pathogen-Endophyte-Ericoid Mycorrhizal-Plant Pathogen-Wood Saprotroph
OTU456	0	0	0	0	0	0	0	0	0	0	0	0	0	0.333333	p__Basidiomycota	g__Cryptococcus	Pathotroph-Saprotroph-Symbiotroph	Fungal Parasite-Undefined Saprotroph
OTU476	0	0	0	0	0	0.333333	0	0	0	0	0	0	0	0	p__Basidiomycota	g__Tapinella	Saprotroph	Wood Saprotroph
OTU6	0	0.333333	0	0	0	0	0	0	0	0	0	0	0	0	p__Basidiomycota	g__Dioszegia	Pathotroph-Saprotroph-Symbiotroph	Fungal Parasite-Undefined Saprotroph
OTU666	0.333333	0	0	0	0	0	0	0	0	0	0	0	0	0	p__Ascomycota	g__unclassified_o__Hypocreales	Saprotroph	Undefined Saprotroph
OTU692	0.333333	0	0	0	0	0	0	0	0	0	0	0	0	0	p__Basidiomycota	g__Cystobasidium	Pathotroph	Fungal Parasite
OTU708	0.333333	0	0	0	0	0	0	0	0	0	0	0	0	0	p__Ascomycota	g__Arthrinium	Saprotroph	Plant Saprotroph
OTU858	0	0	0	0	0	0	0	0.333333	0	0	0	0	0	0	p__Ascomycota	g__Emericella	Saprotroph	Undefined Saprotroph
OTU908	0	0	0	0	0	0	0	0.333333	0	0	0	0	0	0	p__Basidiomycota	g__Junghuhnia	Saprotroph	Wood Saprotroph
OTU999	0	0	0	0	0	0	0	0.333333	0	0	0	0	0	0	p__Ascomycota	g__Nemania	Saprotroph	Undefined Saprotroph
OTU35	0	0.333333	0	0	0	0	0	0	0	0	0	0	0	0	p__unclassified_k__Fungi	g__unclassified_k__Fungi	-	-
OTU1049	0	0	0	0	0	0	0	0	0.333333	0	0	0	0	0	p__unclassified_k__Fungi	g__unclassified_k__Fungi	-	-
OTU1954	0	0	0	0	0	0	0	0	0	0	0	0.333333	0	0	p__Ascomycota	g__unclassified_c__Pezizomycetes	-	-
OTU128	0	0.333333	0	0	0	0	0	0	0	0	0	0	0	0	p__unclassified_k__Fungi	g__unclassified_k__Fungi	-	-
OTU766	0.333333	0	0	0	0	0	0	0	0	0	0	0	0	0	p__Ascomycota	g__unclassified_p__Ascomycota	-	-
OTU1884	0	0	0	0	0	0	0	0	0	0.333333	0	0	0	0	p__unclassified_k__Fungi	g__unclassified_k__Fungi	-	-
OTU1152	0	0	0	0	0	0	0	0	0	0.333333	0	0	0	0	p__Ascomycota	g__unclassified_c__Sordariomycetes	-	-
OTU1191	0	0	0	0	0	0	0	0	0	0.333333	0	0	0	0	p__Ascomycota	g__unclassified_p__Ascomycota	-	-
OTU1435	0	0	0	0	0	0	0	0	0	0	0	0.333333	0	0	p__unclassified_k__Fungi	g__unclassified_k__Fungi	-	-
OTU1252	0	0	0	0	0	0	0	0	0	0.333333	0	0	0	0	p__Basidiomycota	g__unclassified_o__Polyporales	-	-
OTU1919	0	0	0	0	0	0	0	0	0	0	0	0.333333	0	0	p__unclassified_k__Fungi	g__unclassified_k__Fungi	-	-
OTU33	0	0.333333	0	0	0	0	0	0	0	0	0	0	0	0	p__unclassified_k__Fungi	g__unclassified_k__Fungi	-	-
OTU1943	0	0	0	0	0	0	0	0.333333	0	0	0	0	0	0	p__Ascomycota	g__unclassified_p__Ascomycota	-	-
OTU131	0	0.333333	0	0	0	0	0	0	0	0	0	0	0	0	p__unclassified_k__Fungi	g__unclassified_k__Fungi	-	-
OTU281	0	0	0	0.333333	0	0	0	0	0	0	0	0	0	0	p__Ascomycota	g__unclassified_p__Ascomycota	-	-
OTU1377	0	0	0	0	0	0	0	0	0	0	0.333333	0	0	0	p__unclassified_k__Fungi	g__unclassified_k__Fungi	-	-
OTU254	0	0	0	0.333333	0	0	0	0	0	0	0	0	0	0	p__unclassified_k__Fungi	g__unclassified_k__Fungi	-	-
OTU135	0	0	0.333333	0	0	0	0	0	0	0	0	0	0	0	p__Ascomycota	g__unclassified_p__Ascomycota	-	-
OTU1073	0	0	0	0	0	0	0	0	0.333333	0	0	0	0	0	p__unclassified_k__Fungi	g__unclassified_k__Fungi	-	-
OTU1564	0	0	0	0	0	0	0	0	0	0	0	0	0.333333	0	p__unclassified_k__Fungi	g__unclassified_k__Fungi	-	-
OTU1473	0	0	0	0	0	0	0	0	0	0	0	0.333333	0	0	p__unclassified_k__Fungi	g__unclassified_k__Fungi	-	-
OTU97	0	0.333333	0	0	0	0	0	0	0	0	0	0	0	0	p__Ascomycota	g__unclassified_c__Leotiomycetes	-	-
OTU88	0	0.333333	0	0	0	0	0	0	0	0	0	0	0	0	p__Basidiomycota	g__unclassified_p__Basidiomycota	-	-
OTU1867	0	0	0	0	0	0	0	0.333333	0	0	0	0	0	0	p__Ascomycota	g__unclassified_o__Pleosporales	-	-
OTU1324	0	0	0	0	0	0	0	0	0	0	0.333333	0	0	0	p__unclassified_k__Fungi	g__unclassified_k__Fungi	-	-
OTU213	0	0	0	0.333333	0	0	0	0	0	0	0	0	0	0	p__Blastocladiomycota	g__unclassified_p__Blastocladiomycota	-	-
OTU1840	0	0	0	0	0	0	0	0	0	0	0	0	0	0.333333	p__unclassified_k__Fungi	g__unclassified_k__Fungi	-	-
OTU7	0	0.333333	0	0	0	0	0	0	0	0	0	0	0	0	p__unclassified_k__Fungi	g__unclassified_k__Fungi	-	-
OTU28	0	0.333333	0	0	0	0	0	0	0	0	0	0	0	0	p__Ascomycota	g__unclassified_c__Sordariomycetes	-	-
OTU1484	0	0	0	0	0	0	0	0	0	0	0	0.333333	0	0	p__unclassified_k__Fungi	g__unclassified_k__Fungi	-	-
OTU1480	0	0	0	0	0	0	0	0	0	0	0	0.333333	0	0	p__unclassified_k__Fungi	g__unclassified_k__Fungi	-	-
OTU2013	0	0	0	0	0	0	0	0	0.333333	0	0	0	0	0	p__unclassified_k__Fungi	g__unclassified_k__Fungi	-	-
OTU386	0	0	0	0	0.333333	0	0	0	0	0	0	0	0	0	p__Ascomycota	g__unclassified_p__Ascomycota	-	-
OTU152	0	0	0.333333	0	0	0	0	0	0	0	0	0	0	0	p__Ascomycota	g__unclassified_c__Dothideomycetes	-	-
OTU180	0	0	0	0.333333	0	0	0	0	0	0	0	0	0	0	p__unclassified_k__Fungi	g__unclassified_k__Fungi	-	-
OTU886	0	0	0	0	0	0	0	0.333333	0	0	0	0	0	0	p__unclassified_k__Fungi	g__unclassified_k__Fungi	-	-
OTU948	0	0	0	0	0	0	0	0.333333	0	0	0	0	0	0	p__unclassified_k__Fungi	g__unclassified_k__Fungi	-	-
OTU1271	0	0	0	0	0	0	0	0	0	0.333333	0	0	0	0	p__Ascomycota	g__unclassified_p__Ascomycota	-	-
OTU601	0	0	0	0	0	0.333333	0	0	0	0	0	0	0	0	p__unclassified_k__Fungi	g__unclassified_k__Fungi	-	-
	453184
